# Supplementary material for: 1,2,3-Triarylazulenes as precursors of azulene-embedded polycyclic aromatic hydrocarbons
Source: Royal Society of Chemistry journal article supplement (doi:10.1039/d4qo01459f), 2024-01-01
Supplement: d4qo01459f1.pdf [file d4qo01459f1.pdf]

## **1,2,3-Triarylazulenes as Precursors of Azulene-Embedded Polycyclic Aromatic Hydrocarbons**

Justyna Biesaga, Sławomir Szafert, Bartłomiej Pigulski\*

*Faculty of Chemistry, University of Wrocław, 14 F. Joliot-Curie, 50-383 Wrocław, Poland*  
e-mail: bartlomej.pigulski@uwr.edu.pl

## Contents

|                                                                |           |
|----------------------------------------------------------------|-----------|
| <b>General.....</b>                                            | <b>3</b>  |
| <b>Synthesis .....</b>                                         | <b>5</b>  |
| <b>X-ray crystallography .....</b>                             | <b>16</b> |
| <b>UV/Vis/NIR spectroscopy.....</b>                            | <b>19</b> |
| <b>Electrochemistry .....</b>                                  | <b>23</b> |
| <b>DFT calculations.....</b>                                   | <b>27</b> |
| <b>NMR Spectra.....</b>                                        | <b>33</b> |
| <b>Cartesian coordinates of DFT-optimized structures .....</b> | <b>53</b> |
| <b>References.....</b>                                         | <b>66</b> |

## General

**Synthesis:** Sensitive reactions were conducted under N<sub>2</sub> using standard Schlenk techniques. Glassware was dried at 120 °C. Solvents for synthesis were treated as follows: 1,4-Dioxane (POCH): distilled over Na/benzophenone, MeNO<sub>2</sub> (POCH) dried over molecular sieves, THF (POCH) purified using mBraun solvent purification system, 1,2-dichloroethane (Acros, 99.8%, Extra Dry) and CH<sub>2</sub>Cl<sub>2</sub> (ChemPur) were used without further purification.

1-Bromo-4-(*tert*-butyl)benzene (Sigma Aldrich, 97%), 1-iodo-4-methoxybenzene (Aldrich, 98%), 4-(*tert*-butyl)phenylboronic acid (Apollo Scientific, 98%), (4-methoxyphenyl)boronic acid (Apollo Scientific, 97%), *N*-iodosuccinimide (NIS, Alfa Aesar, 97%), B<sub>2</sub>(pin)<sub>2</sub> (Alfa Aesar, 98%), FeCl<sub>3</sub> (POCH, pure for analysis), K<sub>2</sub>CO<sub>3</sub> (Aldrich, pure for synthesis), Cs<sub>2</sub>CO<sub>3</sub> (Sigma Aldrich, 99%) were used as received. Catalysts were purified by recrystallization under N<sub>2</sub>: Pd(dppf)Cl<sub>2</sub>·CH<sub>2</sub>Cl<sub>2</sub> (Aldrich) from CH<sub>2</sub>Cl<sub>2</sub>/*n*-hexane (1/1) mixture, [Ir(OMe)cod]<sub>2</sub> (Aldrich, 98%) from CH<sub>2</sub>Cl<sub>2</sub>/MeOH (1/1) mixture.

Following compound were prepared according to the literature methods: 6-*tert*-butylazulene,<sup>1</sup> 2-bromo-7-(*tert*-butyl)pyrene,<sup>2</sup> 2-(7-(*tert*-butyl)pyren-2-yl)-4,4,5,5-tetramethyl-1,3,2-dioxaborolane.<sup>2</sup>

**Chromatography:** *Column chromatography:* standard glass columns and silica gel 60 (0.040-0.063 mm or 0.063-0.200 mm, Merck Millipore). Solvents for column chromatography were used without additional purification.

*SEC (Size exclusion chromatography):* Glass columns, BioBeads SX-1 stationary phase and CH<sub>2</sub>Cl<sub>2</sub> as an eluent.

*GPC (Gel permeation chromatography):* JAI LaboACE LC-7080 recycling preparative system with JAIGEL-2HR (20φx600) and JAIGEL-2.5HR (20φx600) column using CHCl<sub>3</sub> stabilized with EtOH as an eluent.

**NMR Spectroscopy:** <sup>1</sup>H and <sup>13</sup>C NMR spectra were recorded with a Bruker Avance 500 MHz, Bruker Avance 600 MHz or JOEL 500 MHz spectrometers. For all the <sup>1</sup>H NMR spectra, the chemical shifts are given in ppm relative to the solvent residual peaks (CDCl<sub>3</sub>, <sup>1</sup>H: 7.26 ppm, <sup>13</sup>C: 77.16 ppm; CD<sub>2</sub>Cl<sub>2</sub>, <sup>1</sup>H: 5.32 ppm, <sup>13</sup>C: 53.84 ppm). Coupling constants are given in Hz.

**High Resolution Mass Spectrometry:** HRMS spectra were recorded as follows: *ESI-HRMS:* Bruker qTOF compact or Shimadzu q-TOF LCMS 9030, *APCI-HRMS:* Bruker qTOF compact.

**UV/Vis/NIR Spectroscopy:** All measurements of CH<sub>2</sub>Cl<sub>2</sub> solutions (*c*~10<sup>-5</sup> M) were carried out in 10 mm quartz cuvettes using two-beam JASCO V-770 spectrophotometer.

**Electrochemistry:** Cyclic voltammetry (CV) and differential pulse voltammetry (DPV) measurements were carried out in CH<sub>2</sub>Cl<sub>2</sub> (dried and degassed from mBraun solvent purification system) using a Metrohm Autolab/PGSTAT302N potentiostat / galvanostat in a glass cell under a N<sub>2</sub> atmosphere at room temperature. A platinum disk working electrode, a platinum wire auxiliary electrode and an Ag/AgCl reference electrode were used for all measurements. Tetrabutylammonium hexafluorophosphate (AmBeed) was used as a supporting electrolyte (0.1 M solution). CV: scan rate was 0.050 V s<sup>-1</sup>. DPV: step size of 0.005

V, a modulation amplitude of 0.01 V, a modulation time of 0.05 s and an interval time of 0.5 s. All potentials were calibrated to the ferrocenium/ferrocene ( $\text{Fc}^+/\text{Fc}$ ) redox couple.

**X-ray single crystal diffraction:** A suitable crystals were selected and measured using Rigaku XtaLAB Synergy-R diffractometer. The crystals were kept at 100 K during data collection. The structures were solved with the olex2.solve<sup>3</sup> or SHELXS<sup>4</sup> structure solution programs and refined with the SHELXL<sup>5</sup> refinement package using least squares minimization.<sup>5</sup>

**Theoretical methods:** Gaussian 16 software was used for density functional theory (DFT) and time-dependent density functional theory (TD-DFT) calculations.<sup>6</sup> B3LYP functional<sup>7,8</sup> and 6-31g(d) basis set were applied for neutral structure optimization, solvent model SCRF=(Solvent=Dichloromethane) was applied. Optimized ground-state geometries were examined by frequency analysis to possess no negative frequency. B3LYP functionals and 6-31g(d) basis sets were applied for TD-DFT calculations of UV/Vis/NIR spectra and NICS(0). UB3LYP/6-31G(d) level of theory was used for calculations of spin density of possible intermediates. Multiwfn software was used for analysis of the electronic transitions.<sup>9</sup>

## Synthesis

### Compound 5, 2-(6-(*tert*-butyl)azulen-2-yl)-4,4,5,5-tetramethyl-1,3,2-dioxaborolane

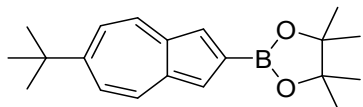

6-*tert*-butylazulene (1.000 g, 5.43 mmol), 4,4'-dimethyl-2,2'-bipyridyl (50 mg, 0.27 mmol), B<sub>2</sub>(pin)<sub>2</sub> (758 mg, 2.98 mmol) and [Ir(MeO)(COD)]<sub>2</sub> (72 mg, 0.11 mmol) were placed in a Schlenk flask and purged with N<sub>2</sub>. Next moisture- and oxygen-free THF was added, and the reaction mixture was stirred under N<sub>2</sub> for 24 h at 80 °C. After given time the solvent was removed under reduced pressure and the crude product was purified using silica gel chromatography (hexane/CH<sub>2</sub>Cl<sub>2</sub>; v/v; from 1/0 to 1/1) yielding 1.11 g (3.58 mmol) of product as a deep blue solid. Yield: 66%

<sup>1</sup>H NMR (500 MHz, CDCl<sub>3</sub>) δ 8.29 (d, *J* = 10.8 Hz, 2H), 7.67 (s, 2H), 7.29 (d, *J* = 10.7 Hz, 2H), 1.45 (s, 9H), 1.40 (s, 12H).

<sup>13</sup>C NMR (126 MHz, CDCl<sub>3</sub>) δ 162.9, 139.6, 137.4, 124.7, 121.0, 83.7, 38.9, 32.0, 25.1 (C-B signal not visible).

ESI-HRMS (positive mode) *m/z* calcd for C<sub>20</sub>H<sub>27</sub>BKO<sub>2</sub><sup>+</sup> (M+K<sup>+</sup>): 348.1772; found: 348.1793.

### Compound 6a, 6-(*tert*-butyl)-2-(4-(*tert*-butyl)phenyl)azulene

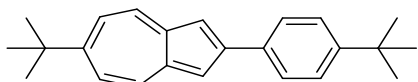

2-(6-(*tert*-butyl)azulen-2-yl)-4,4,5,5-tetramethyl-1,3,2-dioxaborolane **5** (350 mg, 1.13 mmol), Pd(dppf)Cl<sub>2</sub>·CH<sub>2</sub>Cl<sub>2</sub> (20.6 mg, 0.028 mmol), 1-bromo-4-(*tert*-butyl)benzene (288 mg, 1.35 mmol), Cs<sub>2</sub>CO<sub>3</sub> (735 mg, 2.26 mmol) were placed in a Schlenk flask and dissolved in 10 mL of 1,4-dioxane and 1 mL of H<sub>2</sub>O. Reaction mixture was degassed and stirred at 80 °C for 18 h. Solvents were evaporated under reduced pressure and crude mixture was purified using silica gel column (hexane to hexane/CH<sub>2</sub>Cl<sub>2</sub>, v/v, 1/1) yielding blue solid (235 mg, 0.742 mmol), yield: 66%

<sup>1</sup>H NMR (500 MHz, CDCl<sub>3</sub>) δ 8.22 (d, *J* = 10.8 Hz, 2H), 7.90 (d, *J* = 8.2 Hz, 2H), 7.59 (s, 2H), 7.49 (d, *J* = 8.2 Hz, 2H), 7.34 (d, *J* = 10.8 Hz, 2H), 1.46 (s, 9H), 1.38 (s, 9H).

<sup>13</sup>C NMR (126 MHz, CDCl<sub>3</sub>) δ 159.9, 151.2, 149.3, 140.2, 134.9, 134.1, 127.3, 126.0, 121.9, 113.9, 38.6, 34.8, 32.1, 31.5.

ESI-HRMS (positive mode) *m/z* calcd for C<sub>24</sub>H<sub>29</sub><sup>+</sup> (M+H<sup>+</sup>): 317.2264; found: 317.2279.

### Compound 6b, 6-(*tert*-butyl)-2-(4-methoxyphenyl)azulene

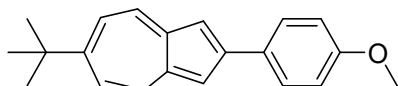

2-(6-(*tert*-butyl)azulen-2-yl)-4,4,5,5-tetramethyl-1,3,2-dioxaborolane **5** (300 mg, 0.967 mmol), 1-iodo-4-methoxybenzene (339 mg, 1.45 mmol), Pd(dppf)Cl<sub>2</sub>·CH<sub>2</sub>Cl<sub>2</sub> (21.2 mg, 0.029 mmol), Cs<sub>2</sub>CO<sub>3</sub> (630 mg, 1.93 mmol), 20 mL of 1,4-dioxane and 2 mL of water were used according to the procedure for **6a**. Reaction was carried out at 80 °C for 21 h, purification: silica gel column (hexane to CH<sub>2</sub>Cl<sub>2</sub>). Blue solid (70 mg, 0.241 mmol), yield: 25%.

$^1\text{H}$  NMR (500 MHz,  $\text{CDCl}_3$ )  $\delta$  8.19 (d,  $J = 10.9$  Hz, 2H), 7.92 – 7.88 (m, 2H), 7.53 (s, 2H), 7.33 (d,  $J = 10.9$  Hz, 2H), 7.02 – 6.97 (m, 2H), 3.87 (s, 3H), 1.45 (s, 9H).

$^{13}\text{C}$  NMR (126 MHz,  $\text{CDCl}_3$ )  $\delta$  159.9, 159.5, 149.1, 140.3, 134.5, 129.7, 128.8, 122.0, 114.5, 113.4, 55.5, 38.6, 32.1.

APCI-HRMS (positive mode)  $m/z$  calcd for  $\text{C}_{21}\text{H}_{23}\text{O}^+$  ( $\text{M}+\text{H}^+$ ): 291.1743; found: 291.1809.

### Compound 6c, 2-(*tert*-butyl)-7-(6-(*tert*-butyl)azulen-2-yl)pyrene

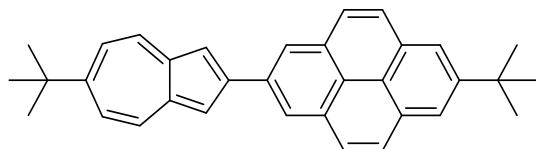

2-(6-(*tert*-butyl)azulen-2-yl)-4,4,5,5-tetramethyl-1,3,2-dioxaborolane **5** (227 mg, 0.732 mmol), 2-bromo-7-(*tert*-butyl)pyrene (271 mg, 0.804 mmol),  $\text{Pd}(\text{dppf})\text{Cl}_2 \cdot \text{CH}_2\text{Cl}_2$  (16.1 mg, 0.022 mmol),  $\text{Cs}_2\text{CO}_3$  (477 mg, 1.46 mmol), 10 mL of 1,4-dioxane and 1 mL of water were used according to the procedure for **6a**. Reaction was carried out at 80 °C for 18 h, purification: silica gel column (hexane to  $\text{CH}_2\text{Cl}_2$ ) and then solid was washed with hexane. Green solid (146 mg, 0.331 mmol), yield: 45%.

$^1\text{H}$  NMR (500 MHz,  $\text{CDCl}_3$ )  $\delta$  8.72 (s, 2H), 8.32 (d,  $J = 10.8$  Hz, 2H), 8.21 (s, 2H), 8.12 (d,  $J = 8.9$  Hz, 2H), 8.06 (d,  $J = 8.9$  Hz, 2H), 7.90 (s, 2H), 7.39 (d,  $J = 10.8$  Hz, 2H), 1.60 (s, 9H), 1.49 (s, 9H).

$^{13}\text{C}$  NMR (126 MHz,  $\text{CDCl}_3$ )  $\delta$  160.5, 149.6, 149.3, 140.5, 135.4, 134.2, 131.6, 131.3, 128.1, 127.7, 124.6, 124.0, 123.1, 122.5, 122.2, 114.6, 38.7, 35.4, 32.1, 32.1.

APCI-HRMS (positive mode)  $m/z$  calcd for  $\text{C}_{24}\text{H}_{33}^+$  ( $\text{M}+\text{H}^+$ ): 441.2577; found: 441.2641.

### Compound 7a, 6-(*tert*-butyl)-2-(4-(*tert*-butyl)phenyl)-1,3-diiodoazulene

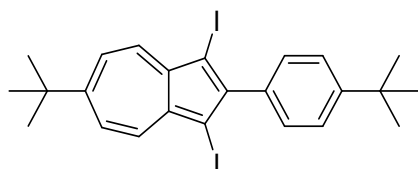

Azulene **6a** (100 mg, 0.316 mmol) was dissolved in 50 mL of  $\text{CH}_2\text{Cl}_2$  and the reaction mixture was cooled down to 0 °C. NIS (149 mg, 0.664 mmol) was added and the blue solution was stirred at room temperature for 3 h. Solvent was evaporated under reduced pressure and the crude product was purified using silica gel column (hexane/ $\text{CH}_2\text{Cl}_2$ , v/v, 1/1) yielding **7a** as a green solid (176 mg, 0.310 mmol), yield: 98%

$^1\text{H}$  NMR (500 MHz,  $\text{CDCl}_3$ )  $\delta$  8.23 (d,  $J = 11.2$  Hz, 2H), 7.57 (d,  $J = 11.2$  Hz, 2H), 7.54 – 7.50 (m, 2H), 7.47 – 7.44 (m, 2H), 1.48 (s, 9H), 1.42 (s, 9H).

$^{13}\text{C}$  NMR (126 MHz,  $\text{CDCl}_3$ )  $\delta$  162.8, 154.1, 151.2, 141.0, 138.4, 135.3, 130.4, 124.8, 123.8, 77.4, 39.0, 34.9, 31.9, 31.6.

ESI-HRMS (positive mode)  $m/z$  calcd for  $\text{C}_{24}\text{H}_{26}\text{I}_2^+$  ( $\text{M}^+$ ): 568.0118; found: 568.0133.

**Compound 7b, 6-(*tert*-butyl)-1,3-diiodo-2-(4-methoxyphenyl)azulene**

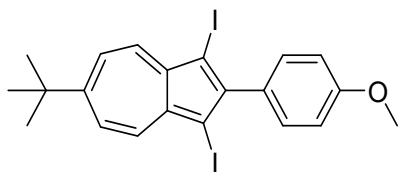

Azulene **6b** (70 mg, 0.241 mmol), NIS (136 mg, 0.602 mmol) and 50 mL of CH<sub>2</sub>Cl<sub>2</sub> were used according to the procedure for **7a**. Reaction time: 1 h, purification: silica gel column (petroleum ether/CH<sub>2</sub>Cl<sub>2</sub>, v/v, 1/1), green solid, yield: 97% (127 mg, 0.234 mmol).

<sup>1</sup>H NMR (500 MHz, CDCl<sub>3</sub>) δ 8.19 (d, *J* = 10.9 Hz, 2H), 7.55 (d, *J* = 10.9 Hz, 2H), 7.46 – 7.42 (m, 2H), 7.05 – 7.02 (m, 2H), 3.89 (s, 3H), 1.46 (s, 9H).

<sup>13</sup>C NMR (126 MHz, CDCl<sub>3</sub>) δ 162.7, 159.7, 153.9, 141.0, 138.3, 132.1, 130.8, 123.8, 113.4, 77.5, 55.4, 39.0, 31.9.

APCI-HRMS (positive mode) *m/z* calcd for C<sub>21</sub>H<sub>21</sub>I<sub>2</sub>O<sup>+</sup> (M<sup>+</sup>): 542.9676; found: 542.9698.

**Compound 7c, 2-(*tert*-butyl)-7-(6-(*tert*-butyl)-1,3-diiodoazulen-2-yl)pyrene**

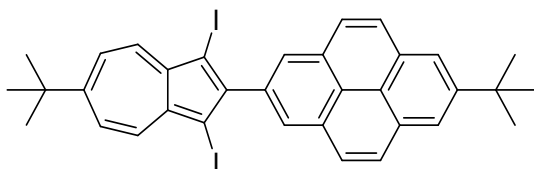

Azulene **6c** (110 mg, 0.250 mmol), NIS (124 mg, 0.602 mmol) and 50 mL of CH<sub>2</sub>Cl<sub>2</sub> were used according to the procedure for **7a**. Reaction time: 1 h, purification: silica gel column (hexane/CH<sub>2</sub>Cl<sub>2</sub>, v/v, 1/1), green solid, yield: 84% (146 mg, 0.211 mmol).

<sup>1</sup>H NMR (500 MHz, CDCl<sub>3</sub>) δ 8.32 (d, *J* = 11.1 Hz, 2H), 8.26 (s, 2H), 8.25 (s, 2H), 8.14 (d, *J* = 8.9 Hz, 2H), 8.11 (d, *J* = 8.9 Hz, 2H), 7.64 (d, *J* = 11.1 Hz, 2H), 1.61 (s, 9H), 1.52 (s, 9H).

<sup>13</sup>C NMR (126 MHz, CDCl<sub>3</sub>) δ 163.2, 154.6, 149.5, 141.1, 138.6, 135.8, 131.3, 130.6, 128.0, 127.6, 127.1, 124.4, 124.0, 123.0, 122.5, 77.9, 39.1, 35.4, 32.1, 32.0.

APCI-HRMS (positive mode) *m/z* calcd for C<sub>34</sub>H<sub>31</sub>I<sub>2</sub><sup>+</sup> (M+H<sup>+</sup>): 693.0510; found: 693.0499.

**Compound 1a, 6-(*tert*-butyl)-1,2,3-tris(4-(*tert*-butyl)phenyl)azulene**

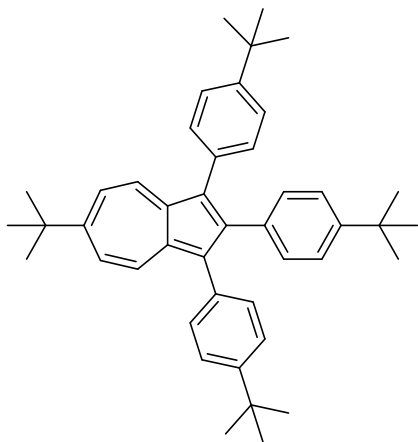

Diiodoazulene **7a** (100 mg, 0.176 mmol) (4-(*tert*-butyl)phenyl)boronic acid (94 mg, 0.528 mmol), Pd(dppf)Cl<sub>2</sub>·CH<sub>2</sub>Cl<sub>2</sub> (6.4 mg, 0.0087 mmol), Cs<sub>2</sub>CO<sub>3</sub> (172 mg, 0.528 mmol) were placed in a Schlenk flask and dissolved in 10 mL of 1,4-dioxane and 1 mL of H<sub>2</sub>O. Reaction mixture was

degassed and stirred at 80 °C for 2 h. Solvents were evaporated under reduced pressure and crude mixture was purified using silica gel column (hexane to hexane/CH<sub>2</sub>Cl<sub>2</sub>, v/v, 1/1) yielding green solid (80 mg, 0.138 mmol), yield: 78%.

<sup>1</sup>H NMR (500 MHz, CDCl<sub>3</sub>) δ 8.26 (d, *J* = 11.0 Hz, 2H), 7.35 – 7.31 (m, 4H), 7.23 (d, *J* = 11.1 Hz, 2H), 7.21 – 7.18 (m, 4H), 7.10 – 7.06 (m, 2H), 6.97 – 6.94 (m, 2H), 1.41 (s, 9H), 1.35 (s, 18H), 1.25 (s, 9H).

<sup>13</sup>C NMR (126 MHz, CDCl<sub>3</sub>) δ 161.4, 149.1, 148.8, 147.3, 136.2, 134.8, 133.9, 133.7, 131.3, 131.1, 128.8, 124.8, 124.3, 121.6, 38.5, 34.6, 34.5, 32.0, 31.6, 31.5.

APCI-HRMS (positive mode) *m/z* calcd for C<sub>44</sub>H<sub>53</sub><sup>+</sup> (M<sup>+</sup>): 581.4142; found: 581.4092.

### Compound 1b, 6-(*tert*-butyl)-2-(4-(*tert*-butyl)phenyl)-1,3-bis(4-methoxyphenyl)azulene

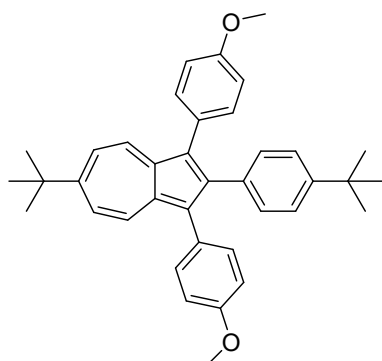

Diiodoazulene **7a** (100 mg, 0.176 mmol), (4-methoxyphenyl)boronic acid (80 mg, 0.528 mmol), Pd(dppf)Cl<sub>2</sub>·CH<sub>2</sub>Cl<sub>2</sub> (6.4 mg, 0.0087 mmol), Cs<sub>2</sub>CO<sub>3</sub> (172 mg, 0.528 mmol), 20 mL of 1,4-dioxane and 2 mL of water were used according to the procedure for **1a**. Reaction carried out at 80 °C for 18 h, purification: silica gel column (hexane to hexane/CH<sub>2</sub>Cl<sub>2</sub>, v/v, 1/1). Green solid (67 mg, 0.127 mmol), yield: 72%.

<sup>1</sup>H NMR (500 MHz, CDCl<sub>3</sub>) δ 8.22 (d, *J* = 11.0 Hz, 2H), 7.23 (d, *J* = 11.0 Hz, 2H), 7.22 – 7.18 (m, 4H), 7.14 – 7.10 (m, 2H), 6.98 – 6.95 (m, 2H), 6.91 – 6.87 (m, 4H), 3.85 (s, 6H), 1.42 (s, 9H), 1.26 (s, 9H).

<sup>13</sup>C NMR (126 MHz, CDCl<sub>3</sub>) δ 161.5, 158.1, 149.2, 147.1, 136.2, 134.6, 133.8, 132.7, 131.0, 129.2, 128.3, 124.6, 121.5, 113.6, 55.4, 38.5, 34.6, 32.0, 31.5.

APCI-HRMS (positive mode) *m/z* calcd for C<sub>38</sub>H<sub>41</sub>O<sub>2</sub><sup>+</sup> (M+H<sup>+</sup>): 529.3101; found: 529.3061.

### Compound 1c, 6-(*tert*-butyl)-1,2,3-tris(4-methoxyphenyl)azulene

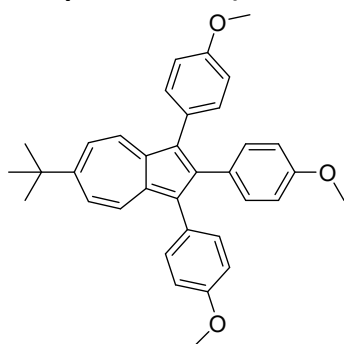

Diiodoazulene **7b** (50 mg, 0.092 mmol, 1.0 equiv.), boronic acid (42 mg, 0.277 mmol), Pd(dppf)Cl<sub>2</sub>·CH<sub>2</sub>Cl<sub>2</sub> (2.0 mg, 0.0028 mmol), Cs<sub>2</sub>CO<sub>3</sub> (90 mg, 0.277 mmol), 5 mL of 1,4-dioxane



and 1 mL of water were used according to the procedure for **1a**. Reaction carried out at 80 °C for 18 h, purification: silica gel column (CH<sub>2</sub>Cl<sub>2</sub>). Green solid (43 mg, 0.085 mmol), yield: 92%.

<sup>1</sup>H NMR (500 MHz, CDCl<sub>3</sub>) δ 8.21 (d, *J* = 11.0 Hz, 2H), 7.23 (d, *J* = 11.0 Hz, 2H), 7.22 – 7.19 (m, 4H), 6.99 – 6.95 (m, 2H), 6.92 – 6.89 (m, 4H), 6.69 – 6.65 (m, 2H), 3.85 (s, 6H), 3.75 (s, 3H), 1.42 (s, 9H).

<sup>13</sup>C NMR (126 MHz, CDCl<sub>3</sub>) δ 161.4, 158.3, 158.2, 146.7, 136.2, 134.4, 132.7, 132.6, 129.3, 129.2, 128.1, 121.6, 113.7, 113.3, 55.4, 55.2, 38.5, 32.0.

APCI-HRMS (positive mode) *m/z* calcd for C<sub>35</sub>H<sub>35</sub>O<sub>3</sub><sup>+</sup> (M+H<sup>+</sup>): 503.2581; found: 503.2547.

**Compound 1d, 2-(*tert*-butyl)-7-(6-(*tert*-butyl)-1,3-bis(4-(*tert*-butyl)phenyl)azulen-2-yl)pyrene**

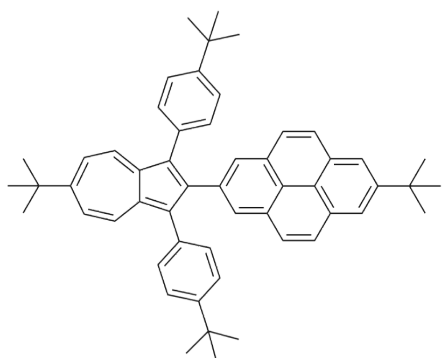

Diiodoazulene **7c** (90 mg, 0.130 mmol), 4-*tert*-butylphenylboronic acid (69 mg, 0.390 mmol), Pd(dppf)Cl<sub>2</sub>·CH<sub>2</sub>Cl<sub>2</sub> (2.9 mg, 0.0039 mmol), Cs<sub>2</sub>CO<sub>3</sub> (85 mg, 0.260 mmol), 10 mL of 1,4-dioxane and 1 mL of water were used according to the procedure for **1a**. Reaction at 80 °C for 20 h, purification: silica gel column (hexane/CH<sub>2</sub>Cl<sub>2</sub>, *v/v*, 10/1), then GPC (CHCl<sub>3</sub>). Green solid (44 mg, 0.062 mmol), yield: 48%.

<sup>1</sup>H NMR (500 MHz, CDCl<sub>3</sub>) δ 8.40 (d, *J* = 11.0 Hz, 2H), 8.13 (s, 2H), 7.90 (d, *J* = 9.0 Hz, 2H), 7.78 (s, 2H), 7.68 (d, *J* = 9.0 Hz, 2H), 7.31 (d, *J* = 11.0 Hz, 2H), 7.25 (d, *J* = 8.6 Hz, 4H), 7.21 (d, *J* = 8.6 Hz, 4H), 1.55 (s, 9H), 1.46 (s, 9H), 1.29 (s, 18H).

<sup>13</sup>C NMR (126 MHz, CDCl<sub>3</sub>) δ 162.0, 149.1, 149.0, 147.3, 136.3, 135.2, 134.5, 133.5, 131.4, 131.2, 130.4, 129.3, 128.4, 127.7, 127.1, 125.0, 123.4, 122.9, 122.0, 121.8, 38.6, 35.3, 34.6, 32.1, 32.0, 31.5.

APCI-HRMS (positive mode) *m/z* calcd for C<sub>54</sub>H<sub>57</sub><sup>+</sup> (M+H<sup>+</sup>): 705.4455; found: 705.4449.

**Compound 1e, 7,7'-(6-(*tert*-butyl)-2-(4-(*tert*-butyl)phenyl)azulene-1,3-diyl)bis(2-(*tert*-butyl)pyrene)**

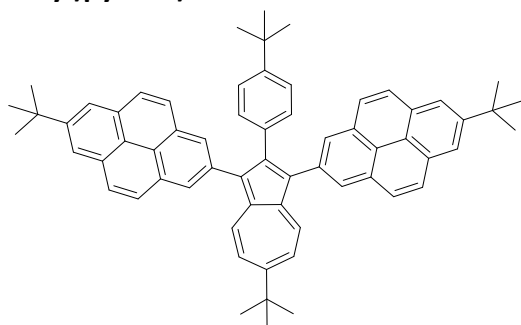

Diiodoazulene **7a** (100 mg, 0.176 mmol), 2-(7-(*tert*-butyl)pyren-2-yl)-4,4,5,5-tetramethyl-1,3,2-dioxaborolane (203 mg, 0.528 mmol), Pd(dppf)Cl<sub>2</sub>·CH<sub>2</sub>Cl<sub>2</sub> (3.9 mg, 0.0053 mmol), Cs<sub>2</sub>CO<sub>3</sub> (115 mg, 0.352 mmol), 10 mL of 1,4-dioxane and 1 mL of water were used according to the procedure for **1a**. Reaction at 80 °C for 24 h, purification: silica gel column (hexane/CH<sub>2</sub>Cl<sub>2</sub>, v/v, 10/1), then SEC (BioBeads SX-1, CH<sub>2</sub>Cl<sub>2</sub>). Blue solid (59 mg, 0.071 mmol), yield: 40%.

<sup>1</sup>H NMR (500 MHz, CDCl<sub>3</sub>) δ 8.46 (d, *J* = 11.1 Hz, 2H), 8.23 (s, 4H), 8.15 (s, 4H), 8.04 (d, *J* = 8.9 Hz, 4H), 7.97 (d, *J* = 8.9 Hz, 4H), 7.36 (d, *J* = 11.1 Hz, 2H), 6.96 (d, *J* = 8.5 Hz, 2H), 6.87 (d, *J* = 8.6 Hz, 2H), 1.61 (s, 18H), 1.46 (s, 9H), 1.09 (s, 9H).

<sup>13</sup>C NMR (126 MHz, CDCl<sub>3</sub>, 300 K) δ 162.0, 149.4, 149.0, 148.4, 137.0, 135.0, 134.4, 133.4, 131.3, 131.2, 131.0, 129.0, 128.3, 127.6, 127.6, 124.6, 123.4, 123.1, 122.5, 122.3, 38.7, 35.4, 34.5, 32.1, 32.0, 31.2.

APCI-HRMS (positive mode) *m/z* calcd for C<sub>64</sub>H<sub>60</sub><sup>+</sup> (M+H<sup>+</sup>): 828.4689; found: 828.4634.

**Compound 1f, 7,7',7''-(6-(*tert*-butyl)azulene-1,2,3-triyl)tris(2-(*tert*-butyl)pyrene)**

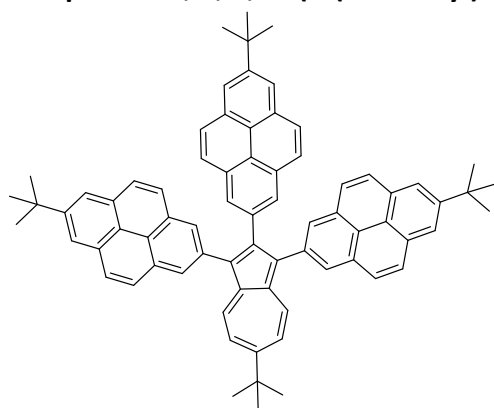

Diiodoazulene **7c** (100 mg, 0.144 mmol), 2-(7-(*tert*-butyl)pyren-2-yl)-4,4,5,5-tetramethyl-1,3,2-dioxaborolane (166 mg, 0.433 mmol), Pd(dppf)Cl<sub>2</sub>·CH<sub>2</sub>Cl<sub>2</sub> (3.2 mg, 0.0043 mmol), Cs<sub>2</sub>CO<sub>3</sub> (141 mg, 0.433 mmol), 10 mL of 1,4-dioxane and 1 mL of water were used according to the procedure for **1a**. Reaction at 80 °C for 20 h, purification: silica gel column (hexane to hexane/CH<sub>2</sub>Cl<sub>2</sub>, v/v, 1/1), then SEC (BioBeads SX-1, CH<sub>2</sub>Cl<sub>2</sub>). Green solid (63 mg, 0.066 mmol), yield: 46%.

<sup>1</sup>H NMR (500 MHz, CDCl<sub>3</sub>) δ 8.56 (d, *J* = 11.0 Hz, 2H), 8.18 (s, 4H), 8.17 (s, 4H), 8.01 (s, 2H), 7.95 (d, *J* = 9.0 Hz, 4H), 7.88 (s, 2H), 7.84 (d, *J* = 9.0 Hz, 4H), 7.67 (d, *J* = 9.0 Hz, 2H), 7.41 (d, *J* = 11.0 Hz, 2H), 7.37 (d, *J* = 9.0 Hz, 2H), 1.58 (s, 18H), 1.49 (s, 9H), 1.48 (s, 9H).

<sup>13</sup>C NMR (126 MHz, CDCl<sub>3</sub>) δ 162.5, 149.0, 149.0, 147.9, 137.3, 135.4, 134.2, 133.9, 131.1, 131.0, 130.5, 129.5, 128.5, 128.3, 127.7, 127.6, 127.6, 127.1, 123.4, 123.4, 123.1, 122.7, 122.7,

122.3, 122.0, 38.8, 35.4, 35.3, 32.1, 32.0, 32.0. (one aromatic signal missing due to overlapping).

APCI-HRMS (positive mode)  $m/z$  calcd for  $C_{73}H_{63}^+$  ( $M+H^+$ ): 939.4924; found: 939.5025.

**Compound 3a, 3,6,11-tri-*tert*-butyl-13 $\alpha$ -(4-(*tert*-butyl)phenyl)azuleno[1,2-*l*]phenanthren-14(13 $\alpha$ H)-one**

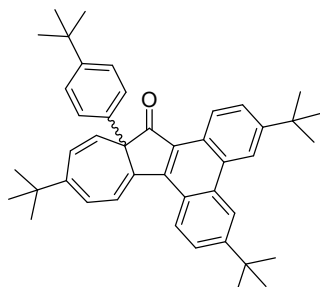

Starting azulene **1a** (10 mg, 0.017 mmol) and 48 mg of  $K_2CO_3$  (0.344 mmol) were placed in a screw-sealed vial and then 1 mL of dry 1,2-dichloroethane was added. The mixture was bubbled with  $N_2$  and then 22 mg (0.138 mmol) of dry  $FeCl_3$  in 0.4 mL of dry nitromethane was added to the reaction mixture. Vial was tightly closed and reaction mixture was stirred for 16 h at 80 °C. Solvent was removed under reduced pressure and mixture was passed through short silica column (hexane) yielding product as yellow solid (9.7 mg, 0.016 mmol). Yield: 93%

$^1H$  NMR (500 MHz,  $CDCl_3$ )  $\delta$  9.16 (d,  $J = 8.7$  Hz, 1H), 8.77 (d,  $J = 11.0$  Hz, 1H), 8.77 (s, 1H), 8.63 (d,  $J = 1.7$  Hz, 1H), 7.80 (dd,  $J = 8.7, 2.0$  Hz, 1H), 7.72 (dd,  $J = 8.7, 1.8$  Hz, 1H), 7.55 (d,  $J = 7.0$  Hz, 1H), 7.15 – 7.11 (m, 2H), 7.09 – 7.06 (m, 2H), 6.63 (d,  $J = 10.1$  Hz, 1H), 6.46 (d,  $J = 10.1$  Hz, 1H), 6.40 (d,  $J = 6.9$  Hz, 1H), 1.55 (s, 9H), 1.49 (s, 9H), 1.19 (s, 9H), 0.99 (s, 9H).

$^{13}C$  NMR (126 MHz,  $CDCl_3$ )  $\delta$  204.8, 154.5, 152.7, 150.8, 149.4, 148.0, 137.4, 135.7, 132.0, 131.2, 128.7, 128.3, 127.1, 127.0, 126.7, 126.0, 125.9, 125.8, 125.7, 124.2, 123.8, 122.8, 119.7, 118.1, 60.7, 36.3, 35.6, 35.5, 34.4, 31.5, 31.4, 30.1, 29.8.

APCI-HRMS (positive mode)  $m/z$  calcd for  $C_{44}H_{51}O^+$  ( $M+H^+$ ): 595.3934; found: 595.3974.

**Compound 3b, 3,11-di-*tert*-butyl-6-methoxy-13 $\alpha$ -(4-methoxyphenyl)azuleno[1,2-*l*]phenanthren-14(13 $\alpha$ H)-one**

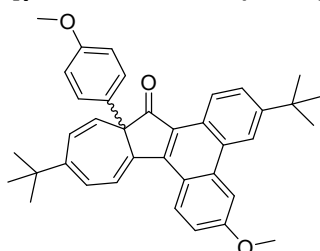

Starting azulene **1b** (25 mg, 0.047 mmol) and 131 mg of  $K_2CO_3$  (0.946 mmol) were placed in a Schlenk flask and then 5 mL of dry 1,2-dichloroethane was added. The mixture was bubbled with  $N_2$  and then 123 mg (0.757 mmol) of dry  $FeCl_3$  in 1.25 mL of dry nitromethane was added to the reaction mixture. Reaction mixture was stirred at 80 °C for 96 h. Solvent was removed under reduced pressure and mixture was purified using short silica gel column (eluent gradually changed from hexane to  $CH_2Cl_2$ ) and washed with methanol yielding product as a yellow solid (15 mg, 0.028 mmol). Yield: 58%

$^1\text{H}$  NMR (500 MHz,  $\text{CDCl}_3$ )  $\delta$  9.16 (d,  $J = 8.7$  Hz, 1H), 8.79 (d,  $J = 9.2$  Hz, 1H), 8.51 (d,  $J = 1.7$  Hz, 1H), 8.16 (d,  $J = 2.6$  Hz, 1H), 7.73 (dd,  $J = 8.7, 1.8$  Hz, 1H), 7.50 (d,  $J = 7.0$  Hz, 1H), 7.34 (dd,  $J = 9.1, 2.6$  Hz, 1H), 7.13 (d,  $J = 8.9$  Hz, 2H), 6.63 (dd,  $J = 10.6, 8.7$  Hz, 3H), 6.44 – 6.39 (m, 2H), 4.09 (s, 3H), 3.69 (s, 3H), 1.48 (s, 9H), 1.03 (s, 9H).

$^{13}\text{C}$  NMR (126 MHz,  $\text{CDCl}_3$ )  $\delta$  204.5, 160.7, 158.4, 156.1, 154.6, 150.8, 148.1, 137.3, 137.2, 131.9, 131.1, 130.5, 129.0, 128.8, 128.4, 127.1, 127.0, 126.2, 125.9, 123.6, 122.8, 122.5, 118.3, 116.1, 112.9, 106.6, 55.7, 55.3, 36.4, 35.5, 31.5, 30.1.

APCI-HRMS (positive mode)  $m/z$  calcd for  $\text{C}_{38}\text{H}_{39}\text{O}_3^+$  ( $\text{M}+\text{H}^+$ ): 543.2894; found: 543.2931.

**Compound 3c, 11-(*tert*-butyl)-3,6-dimethoxy-13a-(4-methoxyphenyl)azuleno[1,2-*I*]phenanthren-14(13a*H*)-one**

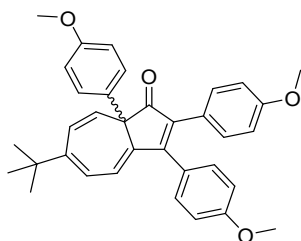

Starting azulene **1c** (10 mg, 0.020 mmol) and 44 mg of  $\text{K}_2\text{CO}_3$  (0.318 mmol) were placed in a Schlenk flask and then 2 mL of dry 1,2-dichloroethane was added. The mixture was bubbled with  $\text{N}_2$  and then 65 mg (0.398 mmol) of dry  $\text{FeCl}_3$  in 0.5 mL of dry nitromethane was added to the reaction mixture. Reaction mixture was stirred at 80 °C for 48 h. Solvent was removed under reduced pressure and mixture was passed through short silica column ( $\text{CH}_2\text{Cl}_2$ /hexane, v/v, 5/2) yielding product as a yellow solid (3 mg, 0.0058 mmol). Yield: 29%

$^1\text{H}$  NMR (500 MHz,  $\text{CDCl}_3$ )  $\delta$  7.28 (d,  $J = 8.8$  Hz, 2H), 7.20 (d,  $J = 8.9$  Hz, 2H), 7.17 (d,  $J = 9.0$  Hz, 2H), 6.95 (d,  $J = 8.8$  Hz, 2H), 6.72 (d,  $J = 4.7$  Hz, 2H), 6.70 (d,  $J = 4.6$  Hz, 2H), 6.53 (d,  $J = 10.3$  Hz, 1H), 6.38 (d,  $J = 10.4$  Hz, 1H), 6.34 (d,  $J = 6.9$  Hz, 1H), 6.20 (d,  $J = 6.9$  Hz, 1H), 3.86 (s, 3H), 3.75 (s, 3H), 3.74 (s, 3H), 0.96 (s, 9H).

$^{13}\text{C}$  NMR (126 MHz,  $\text{CDCl}_3$ )  $\delta$  204.9, 162.5, 160.2, 159.3, 158.5, 154.5, 141.7, 135.1, 132.4, 131.5, 131.3, 130.9, 130.5, 128.9, 128.1, 126.2, 123.9, 122.6, 122.0, 114.3, 113.6, 113.1, 55.5, 55.4, 55.3, 36.5, 30.0.

APCI-HRMS (positive mode)  $m/z$  calcd for  $\text{C}_{35}\text{H}_{35}\text{O}_4^+$  ( $\text{M}+\text{H}^+$ ): 519.2523; found: 519.2523.

**Compound 4d:** 4,9,14-tri-*tert*-butyl-17-(4-(*tert*-butyl)phenyl)azuleno[2,1-*k*]dibenzo[*m,pqr*]tetraphene and compound **2d:** 2,7,12,17-tetra-*tert*-butylazuleno[1,2,3-*cd*]tribenzo[*a,f,lm*]perylene

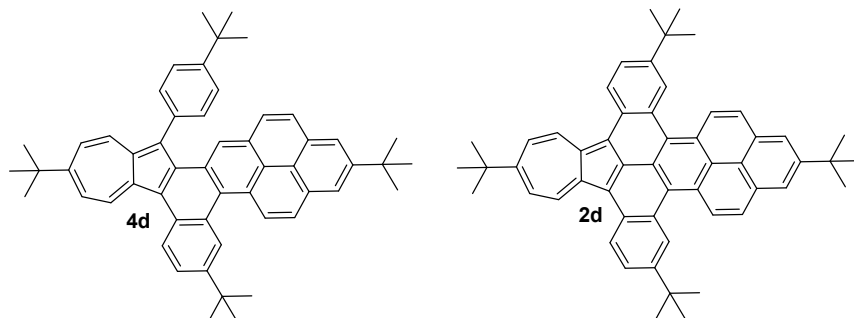

Starting azulene **1d** (10 mg, 0.014 mmol) and 31 mg of  $K_2CO_3$  (0.227 mmol) were placed in a Schlenk flask and then 2 mL of dry 1,2-dichloroethane was added. The mixture was bubbled with  $N_2$  and then 18 mg (0.113 mmol) of dry  $FeCl_3$  in 0.4 mL of dry nitromethane was added to the reaction mixture. Reaction mixture was stirred for 24 h at room temperature. Solvent was removed under reduced pressure and mixture was passed through short silica column (hexane/ $CH_2Cl_2$ , v/v, 7/3) and purified using GPC ( $CHCl_3$ ) yielding product **4d** as a green solid (3.0 mg, 0.0043 mmol, yield: 30%) and traces of **2d**. Extension of the reaction time to 7 d followed by the same workup gave **4d** as a green solid (3.0 mg, 0.0043 mmol, yield: 30%) and **2d** as a red solid (3.5 mg, 0.0050 mmol, yield: 36%).

**Compound 4d:** 4,9,14-tri-*tert*-butyl-17-(4-(*tert*-butyl)phenyl)azuleno[2,1-*k*]dibenzo[*m,pqr*]tetraphene:

$^1H$  NMR (500 MHz,  $CDCl_3$ )  $\delta$  9.38 (d,  $J = 10.2$  Hz, 1H), 9.20 (d,  $J = 9.3$  Hz, 1H), 9.02 (d,  $J = 2.0$  Hz, 1H), 8.92 (d,  $J = 8.6$  Hz, 1H), 8.53 (s, 1H), 8.24 (d,  $J = 1.7$  Hz, 1H), 8.23 (d,  $J = 2.7$  Hz, 1H), 8.21 (s, 1H), 8.16 (d,  $J = 1.7$  Hz, 1H), 7.90 (d,  $J = 9.0$  Hz, 1H), 7.83 (dd,  $J = 8.5, 2.0$  Hz, 1H), 7.70 (d,  $J = 8.3$  Hz, 2H), 7.60 – 7.51 (m, 4H), 7.38 (dd,  $J = 11.1, 1.9$  Hz, 1H), 1.60 (s, 9H), 1.58 (s, 9H), 1.54 (s, 9H), 1.51 (s, 9H).

$^{13}C$  NMR (126 MHz,  $CDCl_3$ )  $\delta$  160.8, 150.7, 149.4, 146.3, 139.7, 137.7, 135.9, 134.6, 134.5, 131.8, 131.3, 130.9, 130.6, 129.1, 129.0, 128.8, 128.5, 128.3, 127.9, 127.6, 127.3, 127.2, 127.0, 126.6, 126.0, 125.3, 125.3, 124.9, 123.9, 123.4, 122.8, 122.6, 122.5, 121.7, 121.3, 120.9, 38.6, 35.4, 35.2, 35.1, 32.1, 32.0, 31.8, 31.7.

APCI-HRMS (positive mode)  $m/z$  calcd for  $C_{54}H_{55}^+$  ( $M+H^+$ ): 703.4298; found: 703.4299.

**Compound 2d:** 2,7,12,17-tetra-*tert*-butylazuleno[1,2,3-*cd*]tribenzo[*a,f,lm*]perylene:

$^1H$  NMR (500 MHz,  $CD_2Cl_2$ )  $\delta$  9.85 (d,  $J = 11.1$  Hz, 2H), 9.24 (d,  $J = 10.6$  Hz, 2H), 9.24 (s, 2H), 9.15 (d,  $J = 8.6$  Hz, 2H), 8.40 (s, 2H), 8.33 (d,  $J = 9.2$  Hz, 2H), 7.97 – 7.92 (m, 4H), 1.68 (s, 9H), 1.65 (s, 9H), 1.59 (s, 18H).

$^{13}C$  NMR (151 MHz,  $CD_2Cl_2$ )  $\delta$  162.3, 150.0, 147.4, 138.3, 135.1, 134.9, 131.7, 130.3, 129.8, 128.8, 127.6, 126.9, 126.6, 126.0, 125.8, 125.4, 124.8, 123.9, 122.7, 122.6, 122.0, 118.3, 39.0, 35.6, 35.5, 32.4, 32.3, 32.1.

APCI-HRMS (positive mode)  $m/z$  calcd for  $C_{54}H_{53}^+$  ( $M+H^+$ ): 701.4142; found: 701.4146.

**Compound 4e, 2,7,13-tri-*tert*-butyl-10-(7-(*tert*-butyl)pyren-2-yl)azuleno[1,2-*k*]dibenzo[*m,pqr*]tetraphene**

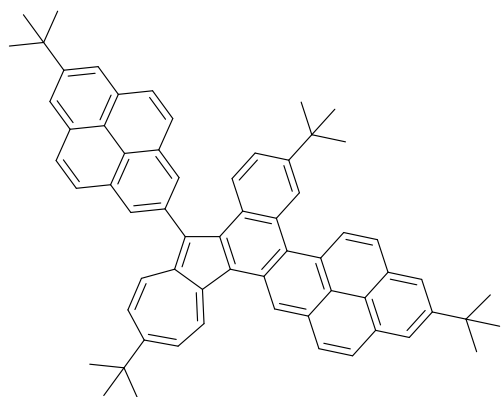

Starting azulene **1e** (35 mg, 0.042 mmol) and 117 mg of  $K_2CO_3$  (0.844 mmol) were placed in a Schlenk flask and then 7 mL of dry 1,2-dichloroethane was added. The mixture was chilled in an ice bath and bubbled with  $N_2$ . Then 110 mg (0.675 mmol) of dry  $FeCl_3$  in 1.75 mL of dry nitromethane was added to the reaction mixture. Reaction mixture was stirred for 18 h at room temperature. Solvent was removed under reduced pressure and mixture was passed through short silica column (hexane/ $CH_2Cl_2$ , v/v, 1/1) and purified using GPC ( $CHCl_3$ ) yielding product as green solid (11 mg, 0.013 mmol). Yield: 32%

$^1H$  NMR (500 MHz,  $CDCl_3$ )  $\delta$  9.72 – 9.68 (m, 2H), 9.20 (d,  $J = 9.3$  Hz, 1H), 9.01 (d,  $J = 1.4$  Hz, 1H), 8.46 (s, 2H), 8.35 – 8.25 (m, 7H), 8.18 – 8.13 (m, 5H), 7.74 (d,  $J = 8.6$  Hz, 2H), 7.39 (dd,  $J = 11.1, 1.5$  Hz, 1H), 7.15 (d,  $J = 8.7$  Hz, 1H), 1.65 (s, 9H), 1.64 (s, 9H), 1.53 (s, 9H), 1.37 (s, 9H).

$^{13}C$  NMR (126 MHz,  $CDCl_3$ )  $\delta$  160.9, 149.4, 149.1, 149.1, 140.3, 138.9, 136.3, 135.8, 134.8, 134.4, 131.8, 131.7, 131.5, 131.5, 131.3, 130.6, 130.3, 128.7, 128.2, 128.1, 128.0, 127.8, 127.8, 127.7, 127.7, 127.1, 126.9, 126.5, 125.3, 124.2, 124.1, 123.5, 123.4, 123.4, 123.2, 122.8, 122.7, 122.3, 122.0, 121.9, 120.5, 120.4, 38.6, 35.5, 35.4, 35.3, 32.2, 32.1, 32.0, 31.5.

APCI-HRMS (positive mode)  $m/z$  calcd for  $C_{64}H_{59}^+$  ( $M+H^+$ ): 827.4611; found: 827.4675.

**Compound 2f, 2,9,16,23-tetra-*tert*-butylazuleno[1,2,3-*hi*]dinaphtho[8,1,2-*pqr*:2',1',8'-*yz*]pyreno[1,2,3-*uv*]hexacene**

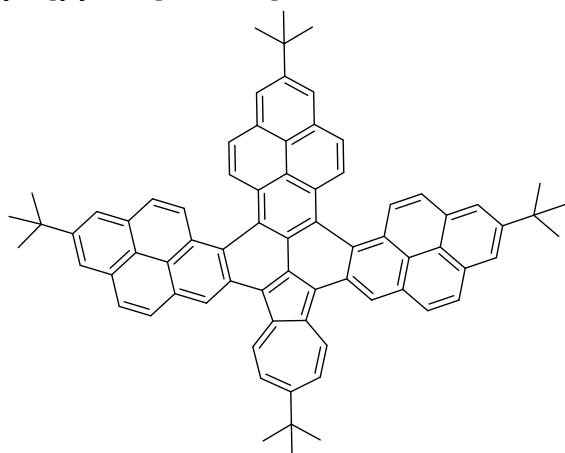

Starting azulene **1f** (12 mg, 0.013 mmol) and 35 mg of  $K_2CO_3$  (0.252 mmol) were placed in a screw-sealed vial and then 2 mL of dry 1,2-dichloroethane was added. The mixture was bubbled with  $N_2$  and the 33 mg (0.201 mmol) of dry  $FeCl_3$  in 0.5 mL of dry nitromethane was added to the reaction mixture. Vial was tightly closed, and reaction mixture was stirred for 16

h at 80 °C. Solvent was removed under reduced pressure and mixture was passed through short silica column (hexane/CH<sub>2</sub>Cl<sub>2</sub>, v/v, 1/1) and purified using preparative TLC (hexane/CH<sub>2</sub>Cl<sub>2</sub>, v/v, 5/1) yielding product as a brown solid (5.7 mg, 0.006 mmol). Yield: 46%

<sup>1</sup>H NMR (500 MHz, CDCl<sub>3</sub>) δ 9.93 (d, *J* = 11.1 Hz, 2H), 9.69 (s, 2H), 8.72 (d, *J* = 9.5 Hz, 2H), 8.59 (d, *J* = 9.5 Hz, 2H), 8.39 (d, *J* = 8.9 Hz, 2H), 8.30 (dd, *J* = 9.1, 1.7 Hz, 4H), 8.26 (s, 2H), 8.22 (d, *J* = 8.9 Hz, 2H), 8.06 (d, *J* = 9.4 Hz, 2H), 8.02 – 7.98 (m, 4H), 1.69 (s, 9H), 1.66 (s, 18H), 1.62 (s, 9H).

<sup>13</sup>C NMR (151 MHz, CD<sub>2</sub>Cl<sub>2</sub>) δ 162.4, 150.1, 149.6, 141.6, 135.5, 135.2, 131.9, 131.7, 131.4, 131.2, 130.8, 130.4, 129.1, 129.0, 128.7, 128.2, 128.1, 127.5, 127.3, 127.1, 125.1, 124.8, 123.9, 123.4, 123.3, 123.2, 123.1, 122.8, 122.7, 121.0, 117.2, 39.0, 35.6, 35.5, 32.2, 32.1, 32.0.

APCI-HRMS (positive mode) *m/z* calcd for C<sub>74</sub>H<sub>61</sub><sup>+</sup> (M+H<sup>+</sup>): 949.4768; found: 949.4730.

## X-ray crystallography

**Table S1.** Detail of X-ray crystallography experiment of **1a**.

| <b>Crystal data CCDC 2371234</b>                                                                               |                                                |
|----------------------------------------------------------------------------------------------------------------|------------------------------------------------|
| Chemical formula                                                                                               | C <sub>44</sub> H <sub>52</sub>                |
| <i>M<sub>r</sub></i>                                                                                           | 580.85                                         |
| Crystal system, space group                                                                                    | Monoclinic, <i>P</i> 2 <sub>1</sub> / <i>c</i> |
| Temperature (K)                                                                                                | 100                                            |
| <i>a</i> , <i>b</i> , <i>c</i> (Å)                                                                             | 11.333 (2), 14.004 (3), 22.087 (5)             |
| β (°)                                                                                                          | 96.66 (3)                                      |
| <i>V</i> (Å <sup>3</sup> )                                                                                     | 3481.7 (13)                                    |
| <i>Z</i>                                                                                                       | 4                                              |
| Radiation type                                                                                                 | Cu Kα                                          |
| μ (mm <sup>-1</sup> )                                                                                          | 0.46                                           |
| Crystal size (mm)                                                                                              | 0.15 × 0.14 × 0.08                             |
| Data collection                                                                                                |                                                |
| Diffractometer                                                                                                 | XtaLAB Synergy R, DW system, HyPix-Arc 150     |
| Absorption correction                                                                                          | –                                              |
| No. of measured, independent and observed [ <i>I</i> > 2σ( <i>I</i> )] reflections                             | 63206, 7210, 6176                              |
| <i>R</i> <sub>int</sub>                                                                                        | 0.024                                          |
| (sin θ/λ) <sub>max</sub> (Å <sup>-1</sup> )                                                                    | 0.628                                          |
| Refinement                                                                                                     |                                                |
| <i>R</i> [ <i>F</i> <sup>2</sup> > 2σ( <i>F</i> <sup>2</sup> )], <i>wR</i> ( <i>F</i> <sup>2</sup> ), <i>S</i> | 0.040, 0.107, 1.03                             |
| No. of reflections                                                                                             | 7210                                           |
| No. of parameters                                                                                              | 409                                            |
| H-atom treatment                                                                                               | H-atom parameters constrained                  |
| Δρ <sub>max</sub> , Δρ <sub>min</sub> (e Å <sup>-3</sup> )                                                     | 0.19, -0.21                                    |



**Table S2.** Detail of X-ray crystallography experiment of **3a**.

| <b>Crystal data CCDC 2371233</b>                                                                               |                                                                                                                                                                                                                         |
|----------------------------------------------------------------------------------------------------------------|-------------------------------------------------------------------------------------------------------------------------------------------------------------------------------------------------------------------------|
| Chemical formula                                                                                               | C <sub>44</sub> H <sub>50</sub> O                                                                                                                                                                                       |
| <i>M<sub>r</sub></i>                                                                                           | 594.84                                                                                                                                                                                                                  |
| Crystal system, space group                                                                                    | Orthorhombic, <i>P</i> 2 <sub>1</sub> 2 <sub>1</sub> 2 <sub>1</sub>                                                                                                                                                     |
| Temperature (K)                                                                                                | 100                                                                                                                                                                                                                     |
| <i>a</i> , <i>b</i> , <i>c</i> (Å)                                                                             | 10.365 (2), 30.398 (6), 33.663 (6)                                                                                                                                                                                      |
| <i>V</i> (Å <sup>3</sup> )                                                                                     | 10606 (3)                                                                                                                                                                                                               |
| <i>Z</i>                                                                                                       | 12                                                                                                                                                                                                                      |
| Radiation type                                                                                                 | Mo <i>K</i> α                                                                                                                                                                                                           |
| μ (mm <sup>-1</sup> )                                                                                          | 0.06                                                                                                                                                                                                                    |
| Crystal size (mm)                                                                                              | 0.33 × 0.25 × 0.12                                                                                                                                                                                                      |
| <b>Data collection</b>                                                                                         |                                                                                                                                                                                                                         |
| Diffractometer                                                                                                 | Xcalibur, Ruby, Gemini ultra                                                                                                                                                                                            |
| Absorption correction                                                                                          | –                                                                                                                                                                                                                       |
| No. of measured, independent and observed [ <i>I</i> > 2σ( <i>I</i> )] reflections                             | 37324, 21232, 10374                                                                                                                                                                                                     |
| <i>R</i> <sub>int</sub>                                                                                        | 0.087                                                                                                                                                                                                                   |
| (sin θ/λ) <sub>max</sub> (Å <sup>-1</sup> )                                                                    | 0.679                                                                                                                                                                                                                   |
| <b>Refinement</b>                                                                                              |                                                                                                                                                                                                                         |
| <i>R</i> [ <i>F</i> <sup>2</sup> > 2σ( <i>F</i> <sup>2</sup> )], <i>wR</i> ( <i>F</i> <sup>2</sup> ), <i>S</i> | 0.091, 0.204, 1.00                                                                                                                                                                                                      |
| No. of reflections                                                                                             | 21232                                                                                                                                                                                                                   |
| No. of parameters                                                                                              | 1252                                                                                                                                                                                                                    |
| H-atom treatment                                                                                               | H-atom parameters constrained                                                                                                                                                                                           |
| Δρ <sub>max</sub> , Δρ <sub>min</sub> (e Å <sup>-3</sup> )                                                     | 0.38, -0.33                                                                                                                                                                                                             |
| Absolute structure                                                                                             | Flack <i>x</i> determined using 2308 quotients [( <i>I</i> <sup>+</sup> )-( <i>I</i> <sup>-</sup> )]/[( <i>I</i> <sup>+</sup> )+( <i>I</i> <sup>-</sup> )] (Parsons, Flack and Wagner, Acta Cryst. B69 (2013) 249-259). |
| Absolute structure parameter                                                                                   | -0.9 (10)                                                                                                                                                                                                               |

**Table S3.** Detail of X-ray crystallography experiment of **4e**.

| <b>Crystal data CCDC 2371235</b>                                                                                        |                                                                                                                                                                                                  |
|-------------------------------------------------------------------------------------------------------------------------|--------------------------------------------------------------------------------------------------------------------------------------------------------------------------------------------------|
| Chemical formula                                                                                                        | C <sub>64</sub> H <sub>58</sub> ·1.5(C <sub>6</sub> H <sub>4</sub> Cl <sub>2</sub> )                                                                                                             |
| <i>M<sub>r</sub></i>                                                                                                    | 1047.59                                                                                                                                                                                          |
| Crystal system, space group                                                                                             | Triclinic, <i>P</i> 1                                                                                                                                                                            |
| Temperature (K)                                                                                                         | 100                                                                                                                                                                                              |
| <i>a</i> , <i>b</i> , <i>c</i> (Å)                                                                                      | 10.287 (2), 15.743 (3), 18.493 (4)                                                                                                                                                               |
| $\alpha$ , $\beta$ , $\gamma$ (°)                                                                                       | 112.04 (3), 98.31 (3), 90.23 (3)                                                                                                                                                                 |
| <i>V</i> (Å <sup>3</sup> )                                                                                              | 2741.4 (11)                                                                                                                                                                                      |
| <i>Z</i>                                                                                                                | 2                                                                                                                                                                                                |
| Radiation type                                                                                                          | Cu <i>K</i> $\alpha$                                                                                                                                                                             |
| $\mu$ (mm <sup>-1</sup> )                                                                                               | 1.85                                                                                                                                                                                             |
| Crystal size (mm)                                                                                                       | 0.27 × 0.20 × 0.12                                                                                                                                                                               |
| <b>Data collection</b>                                                                                                  |                                                                                                                                                                                                  |
| Diffractometer                                                                                                          | XtaLAB Synergy R, DW system, HyPix-Arc 150                                                                                                                                                       |
| Absorption correction                                                                                                   | Multi-scan<br><i>CrysAlis PRO</i> 1.171.43.105a (Rigaku Oxford Diffraction, 2024)<br>Empirical absorption correction using spherical harmonics, implemented in SCALE3 ABSPACK scaling algorithm. |
| <i>T<sub>min</sub></i> , <i>T<sub>max</sub></i>                                                                         | 0.846, 1.000                                                                                                                                                                                     |
| No. of measured, independent and observed [ <i>I</i> > 2 $\sigma$ ( <i>I</i> )] reflections                             | 68595, 11179, 10382                                                                                                                                                                              |
| <i>R<sub>int</sub></i>                                                                                                  | 0.021                                                                                                                                                                                            |
| ( $\sin \theta/\lambda$ ) <sub>max</sub> (Å <sup>-1</sup> )                                                             | 0.629                                                                                                                                                                                            |
| <b>Refinement</b>                                                                                                       |                                                                                                                                                                                                  |
| <i>R</i> [ <i>F</i> <sup>2</sup> > 2 $\sigma$ ( <i>F</i> <sup>2</sup> )], <i>wR</i> ( <i>F</i> <sup>2</sup> ), <i>S</i> | 0.042, 0.117, 1.03                                                                                                                                                                               |
| No. of reflections                                                                                                      | 11179                                                                                                                                                                                            |
| No. of parameters                                                                                                       | 739                                                                                                                                                                                              |
| H-atom treatment                                                                                                        | H atoms treated by a mixture of independent and constrained refinement                                                                                                                           |
| $\Delta\rho_{\max}$ , $\Delta\rho_{\min}$ (e Å <sup>-3</sup> )                                                          | 0.68, -0.53                                                                                                                                                                                      |

## UV/Vis/NIR spectroscopy

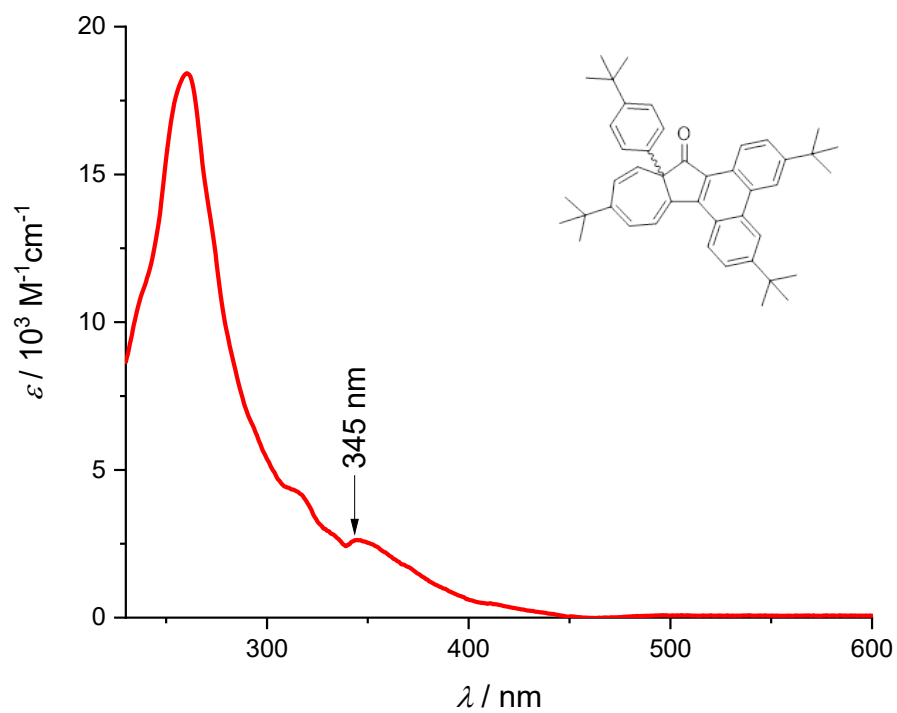

**Figure S1.** UV/Vis spectrum of compound **3a** ( $\text{CH}_2\text{Cl}_2$ ,  $c \sim 10^{-6} \text{ M}$ ).

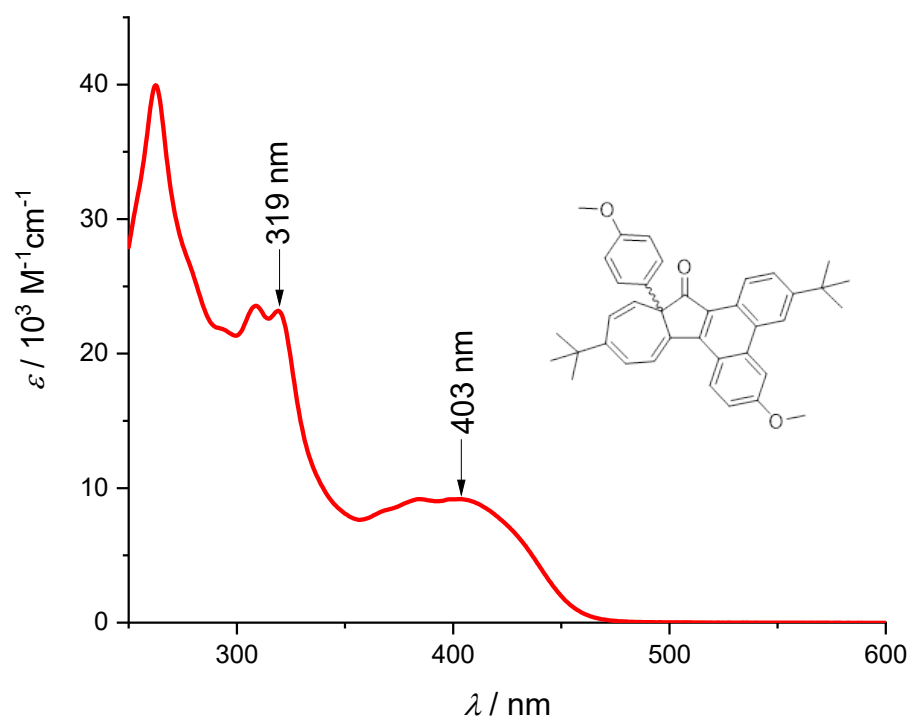

**Figure S2.** UV/Vis spectrum of compound **3b** ( $\text{CH}_2\text{Cl}_2$ ,  $c \sim 10^{-6} \text{ M}$ ).

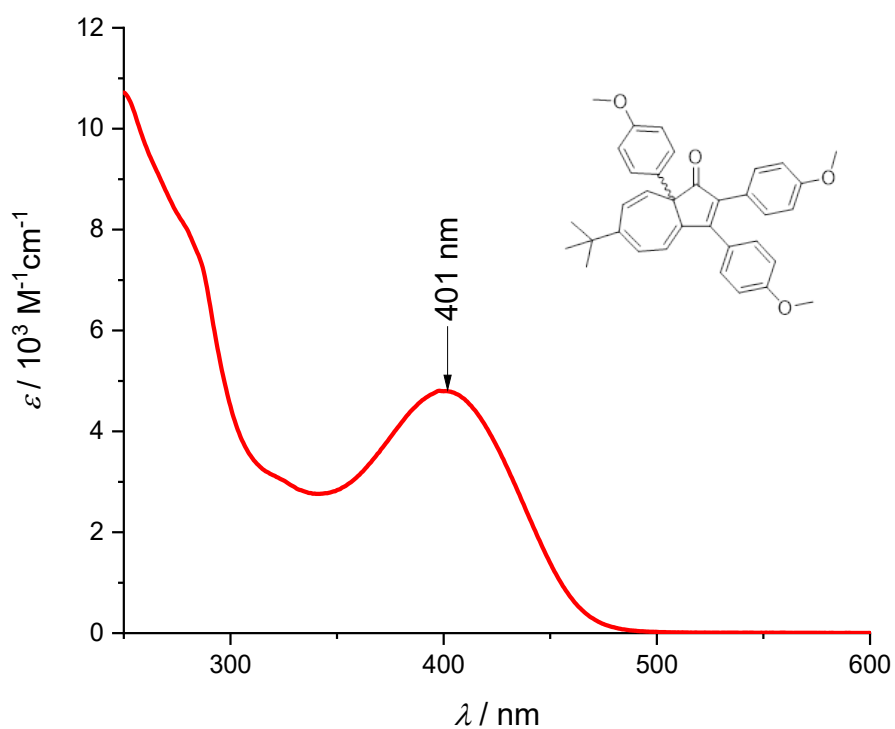

**Figure S3.** UV/Vis spectrum of compound **3c** ( $\text{CH}_2\text{Cl}_2$ ,  $c \sim 10^{-6} \text{ M}$ ).

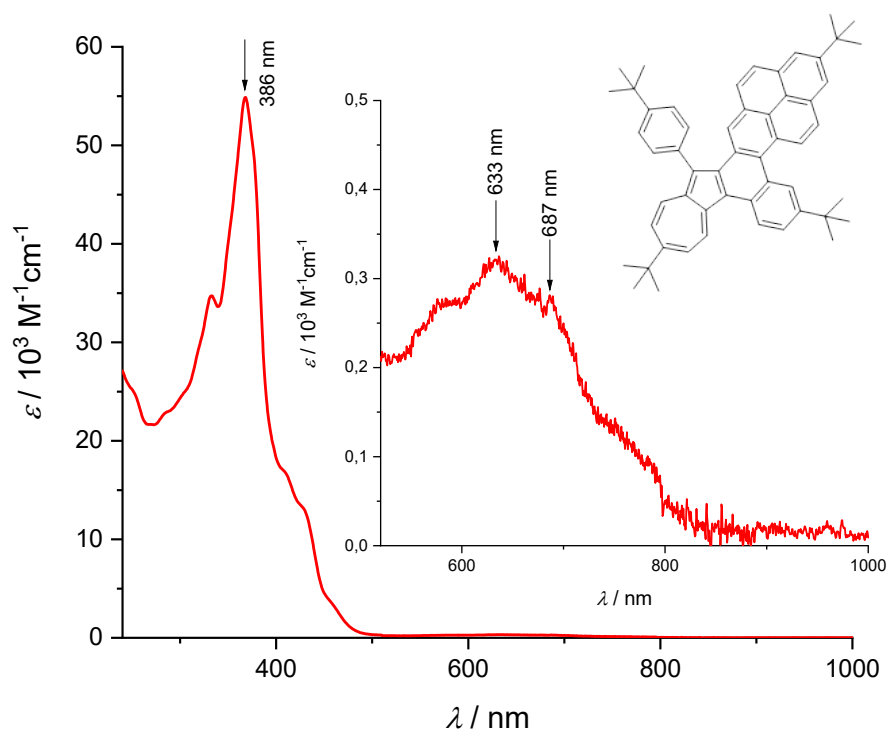

**Figure S4.** UV/Vis spectrum of compound **4d** ( $\text{CH}_2\text{Cl}_2$ ,  $c \sim 10^{-6} \text{ M}$ ).

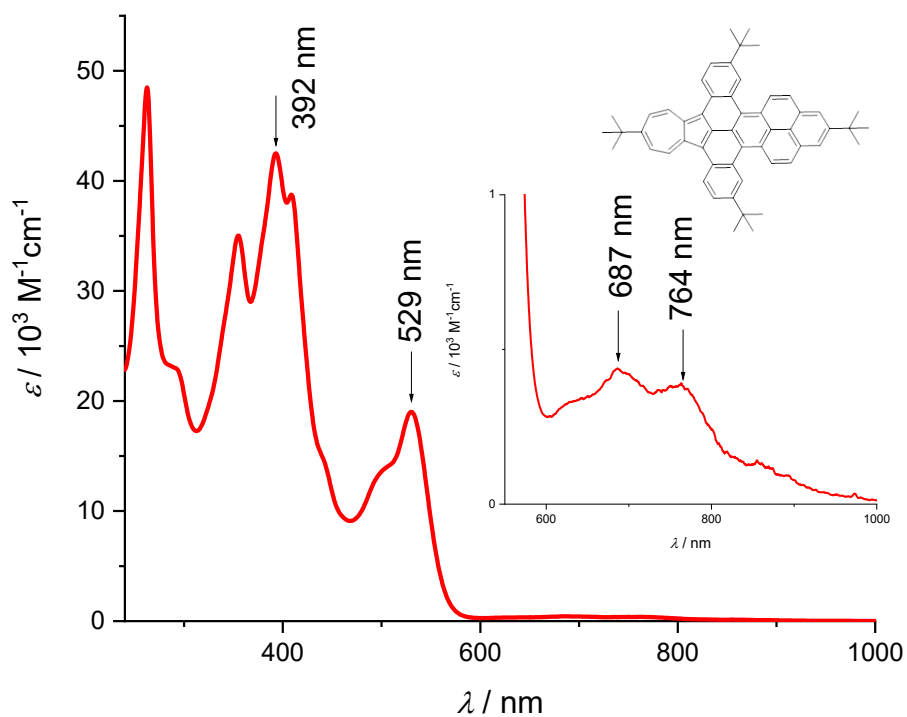

**Figure S5.** UV/Vis spectrum of compound **2d** ( $\text{CH}_2\text{Cl}_2$ ,  $c \sim 10^{-6}$  M).

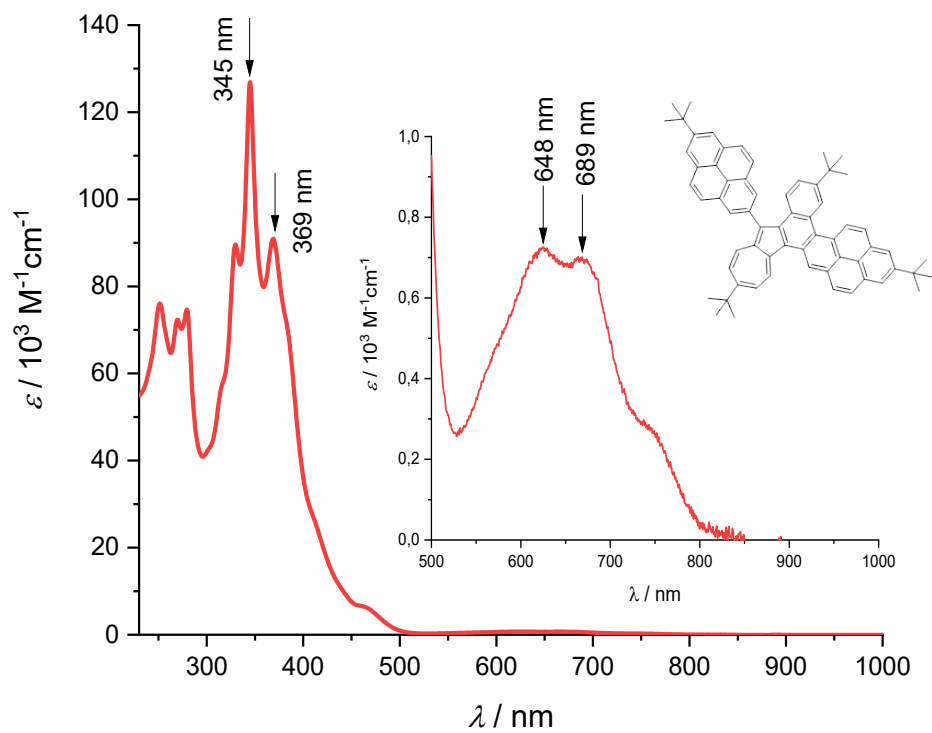

**Figure S6.** UV/Vis/NIR spectrum of compound **4e** ( $\text{CH}_2\text{Cl}_2$ ,  $c \sim 10^{-6}$  M).

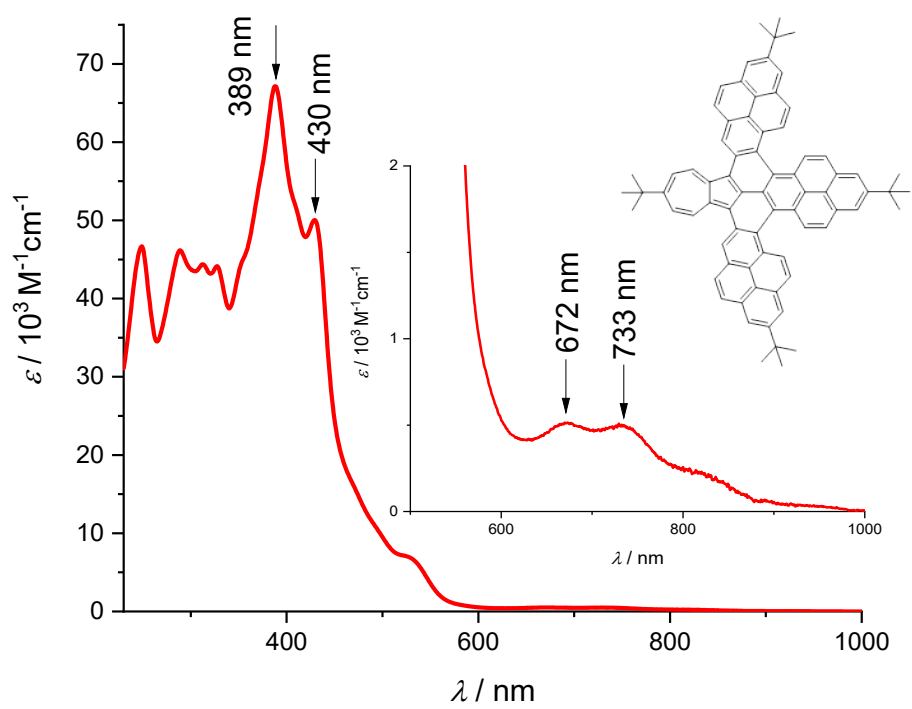

**Figure S7.** UV/Vis/NIR spectrum of compound **2f** ( $\text{CH}_2\text{Cl}_2$ ,  $c \sim 10^{-6} \text{ M}$ ).

## Electrochemistry

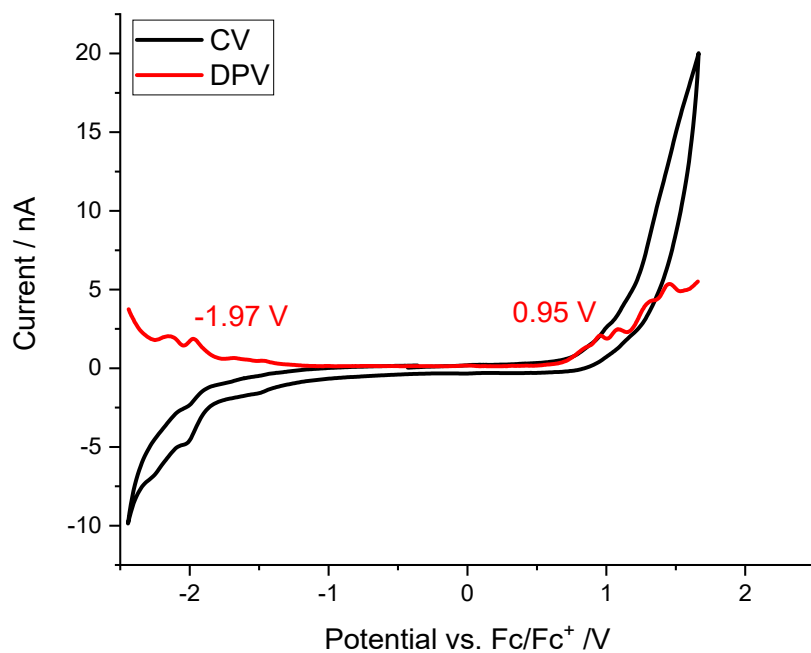

**Figure S8.** CV (black) and DPV (red) of compound **3a** ([NBu<sub>4</sub>][PF<sub>6</sub>] in CH<sub>2</sub>Cl<sub>2</sub> (0.1 M) as a supporting electrolyte, 50 mV/s scanning rate).

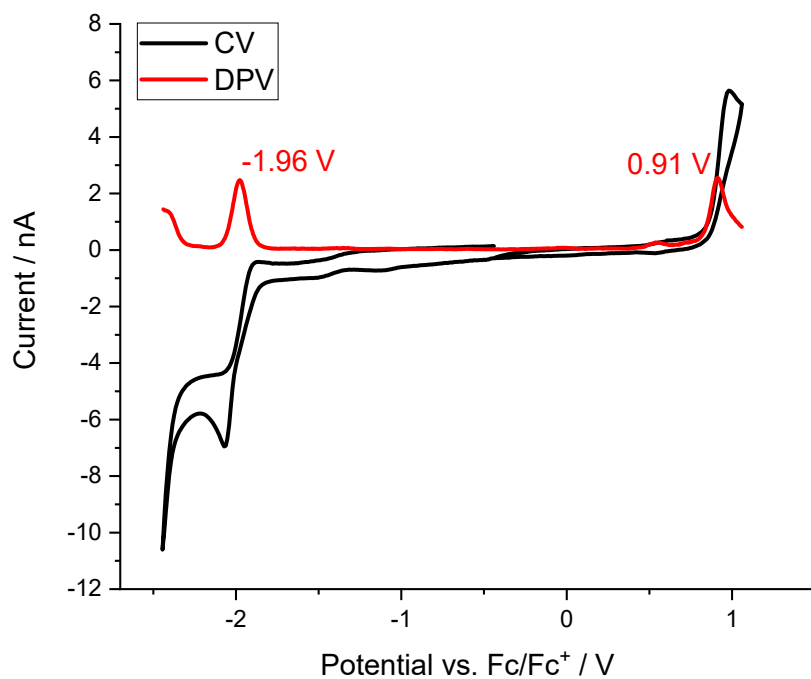

**Figure S9.** CV (black) and DPV (red) of compound **3b** ([NBu<sub>4</sub>][PF<sub>6</sub>] in CH<sub>2</sub>Cl<sub>2</sub> (0.1 M) as a supporting electrolyte, 50 mV/s scanning rate).

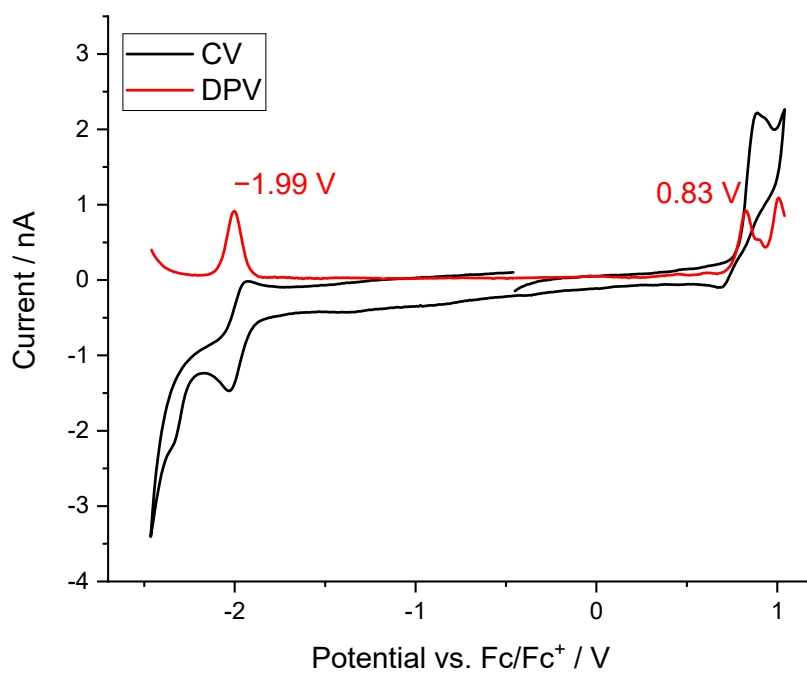

**Figure S10.** CV (black) and DPV (red) of compound **3c** ( $[\text{NBu}_4][\text{PF}_6]$ ) in  $\text{CH}_2\text{Cl}_2$  (0.1 M) as a supporting electrolyte, 50 mV/s scanning rate).

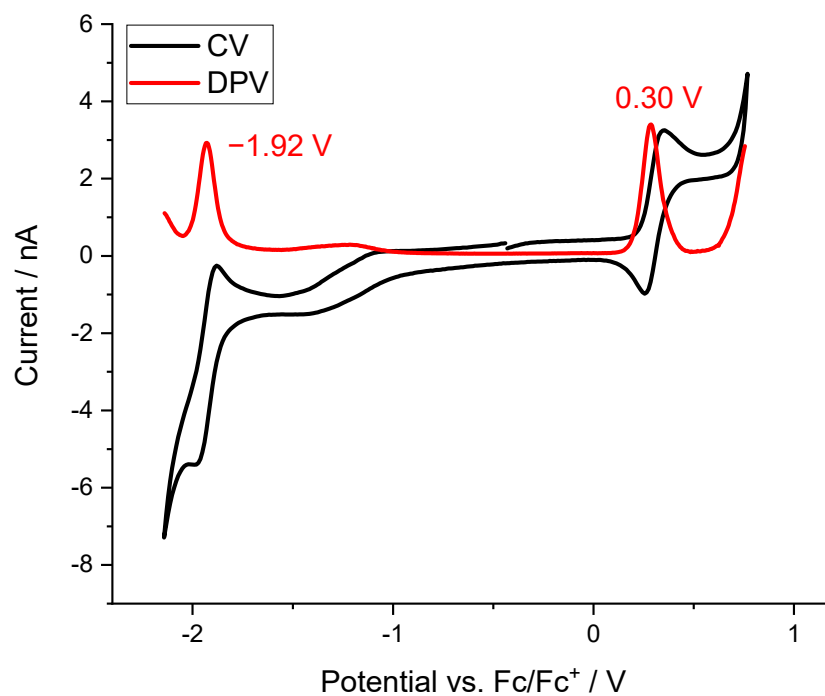

**Figure S11.** CV (black) and DPV (red) of compound **4d** ( $[\text{NBu}_4][\text{PF}_6]$ ) in  $\text{CH}_2\text{Cl}_2$  (0.1 M) as a supporting electrolyte, 50 mV/s scanning rate).



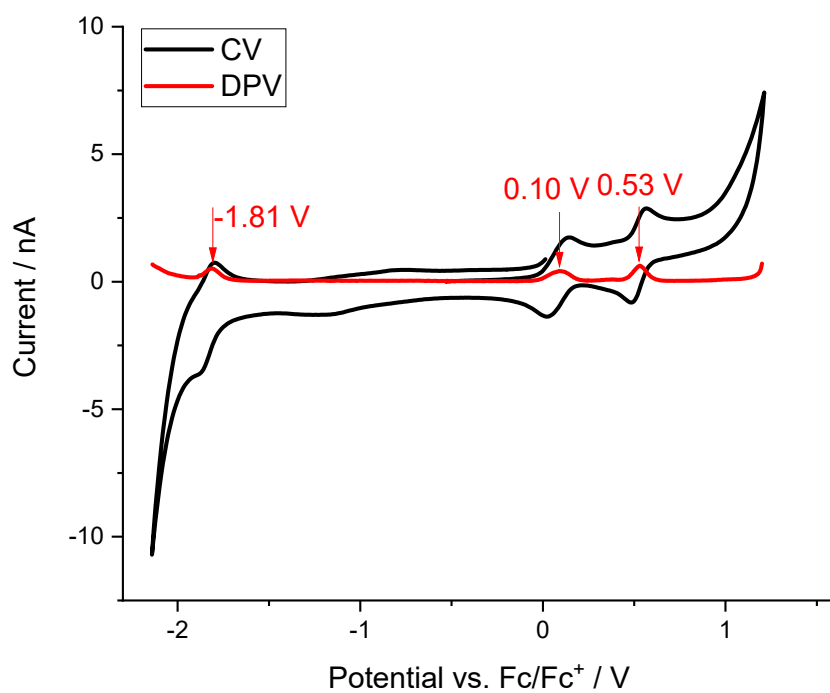

**Figure S12.** CV (black) and DPV (red) of compound **2d** ( $[\text{NBu}_4][\text{PF}_6]$  in  $\text{CH}_2\text{Cl}_2$  (0.1 M) as a supporting electrolyte, 50 mV/s scanning rate).

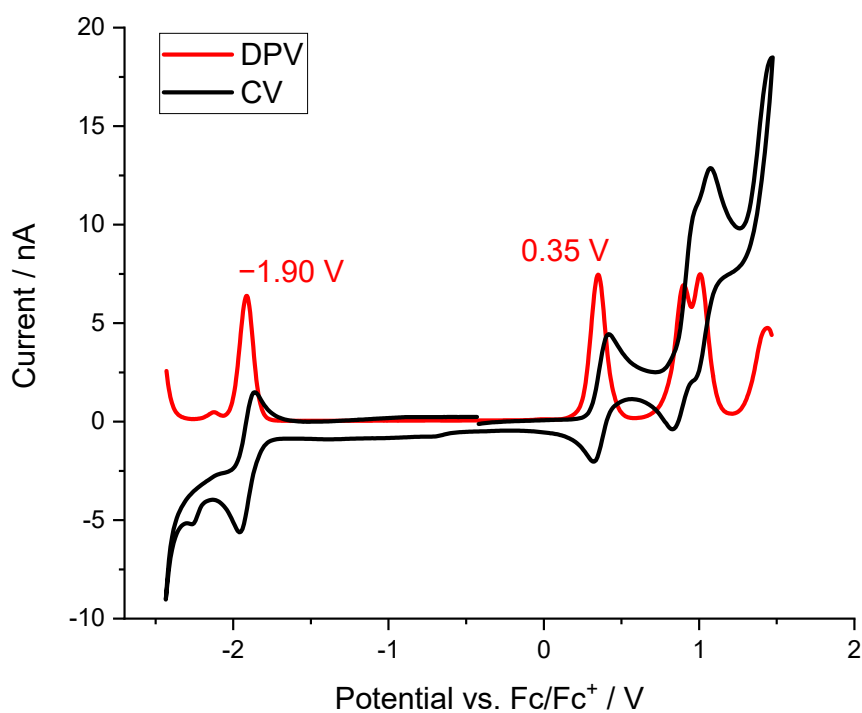

**Figure S13.** CV (black) and DPV (red) of compound **4e** ( $[\text{NBu}_4][\text{PF}_6]$  in  $\text{CH}_2\text{Cl}_2$  (0.1 M) as a supporting electrolyte, 50 mV/s scanning rate).

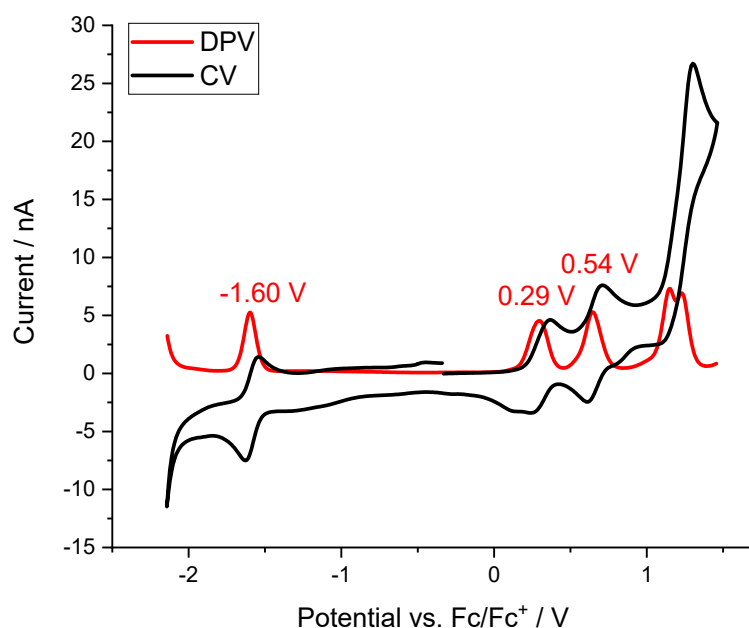

**Figure S14.** CV (black) and DPV (red) of compound **2f** ( $[\text{NEt}_4][\text{PF}_6]$  in  $\text{CH}_2\text{Cl}_2$  (0.1 M) as a supporting electrolyte, 50 mV/s scanning rate ).

**Table S4.** Experimental and DFT-calculated HOMO and LUMO levels.

|                                      | <b>3a</b> | <b>3b</b> | <b>3c</b> | <b>2d</b> | <b>4d</b> | <b>4e</b> | <b>2f</b> |
|--------------------------------------|-----------|-----------|-----------|-----------|-----------|-----------|-----------|
| $E_{\text{HOMO}}$ (DFT) <sup>a</sup> | -5.45 eV  | -5.42 eV  | -5.30 eV  | -4.67 eV  | -4.88 eV  | -4.95 eV  | -4.75 eV  |
| $E_{\text{LUMO}}$ (DFT) <sup>a</sup> | -2.28 eV  | -2.23 eV  | -2.20 eV  | -2.18 eV  | -2.12 eV  | -2.14 eV  | -2.25 eV  |
| $E_{\text{g}}$ (DFT)                 | 3.17 eV   | 3.19 eV   | 3.10 eV   | 2.49 eV   | 2.76 eV   | 2.81 eV   | 2.50 eV   |
| $E_{\text{HOMO}}$ (EXP) <sup>b</sup> | -5.71 eV  | -5.63 eV  | -5.83 eV  | -4.90 eV  | -5.10 eV  | -5.15 eV  | -5.09 eV  |
| $E_{\text{LUMO}}$ (EXP) <sup>b</sup> | -2.84 eV  | -2.81 eV  | -2.82 eV  | -2.99 eV  | -2.88 eV  | -2.90 eV  | -3.20 eV  |
| $E_{\text{g}}$ (EXP)                 | 2.92 eV   | 2.87 eV   | 2.82 eV   | 1.91 eV   | 2.22 eV   | 2.25 eV   | 1.89 eV   |
| $E_{\text{ox}}$ <sup>c</sup>         | 0.95 V    | 0.91 V    | 0.83 V    | 0.10 V    | 0.30 V    | 0.35 V    | 0.29 V    |
| $E_{\text{red}}$ <sup>c</sup>        | -1.97 V   | -1.96 V   | -1.99 V   | -1.81 V   | -1.92 V   | -1.90 V   | -1.60 V   |

<sup>a</sup>B3LYP/6-31G(d) level of theory; <sup>b</sup>Calculated according to the known procedure using the experimentally determined redox potentials ( $E_{\text{LUMO}} = -(E_{\text{red}} + 4.8 \text{ eV})$  and  $E_{\text{HOMO}} = -(E_{\text{ox}} + 4.8 \text{ eV})$ ) and the energy level of  $\text{Fc}^+/\text{Fc}$  with respect to the vacuum level (-4.8 eV);<sup>10</sup> <sup>c</sup>Potentials versus  $\text{Fc}/\text{Fc}^+$  in  $\text{CH}_2\text{Cl}_2$ , 25°C,  $[\text{NBu}_4][\text{PF}_6]$  (0.1 M) as a supporting electrolyte.

## DFT calculations

### Spin densities of radical cations

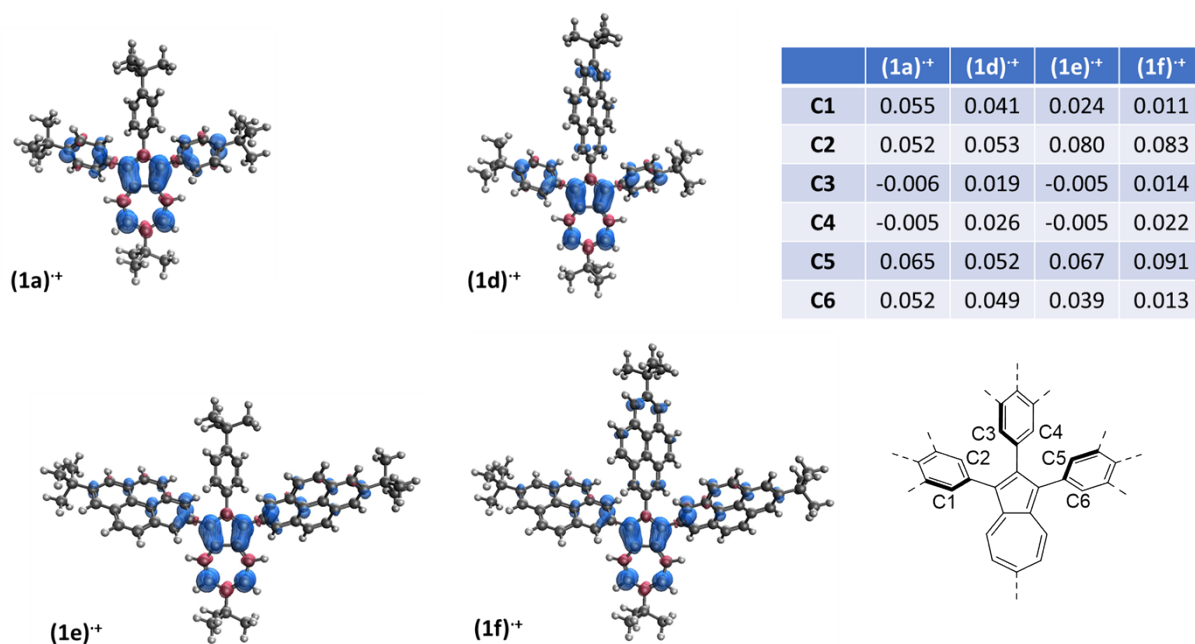

**Figure S15.** DFT-calculated spin densities of radical cations **(1a)<sup>+</sup>**, **(1d)<sup>+</sup>**, **(1e)<sup>+</sup>** and **(1f)<sup>+</sup>**, UB3LYP/6-31G(d).

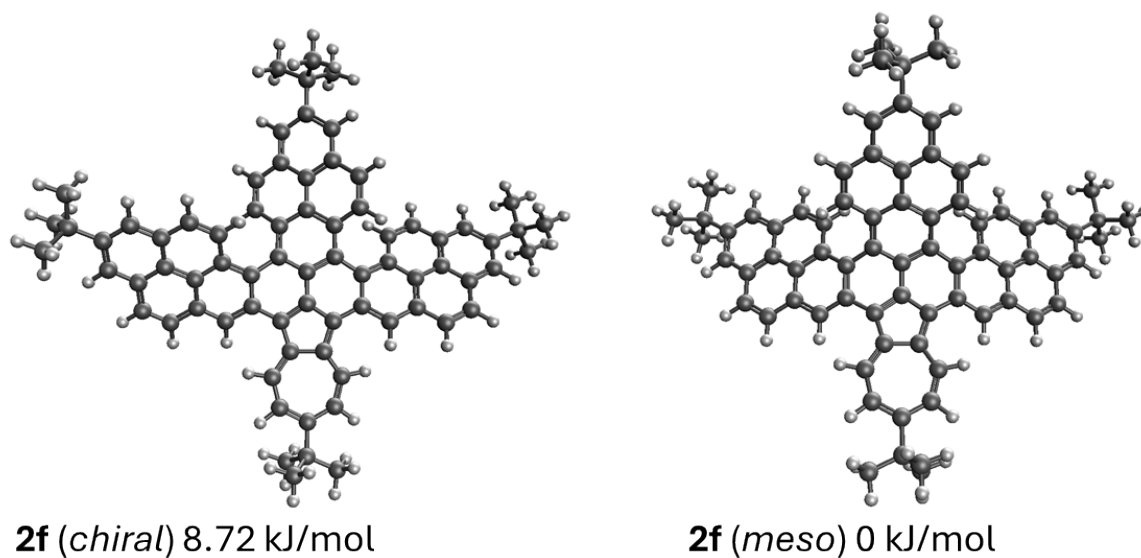

**Figure S16.** DFT-calculated energy difference between two possible isomers of **2f**: chiral (*P,P* or *M,M*) and *meso* (*P,M*) form, B3LYP/6-31G(d).

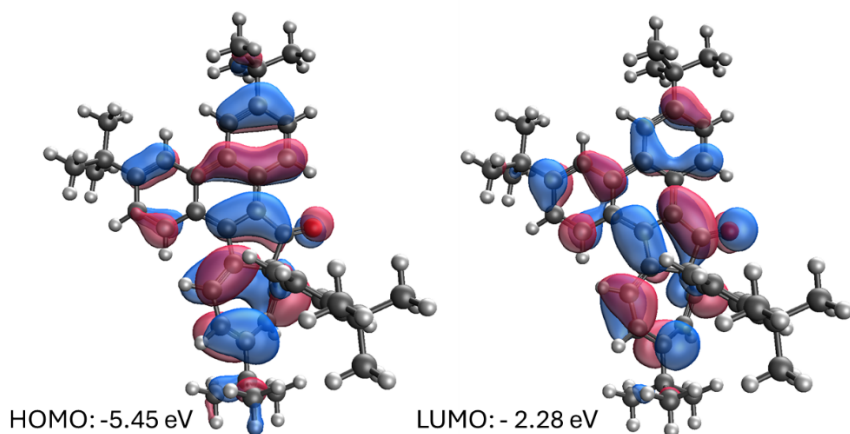

**Figure S17.** HOMO and LUMO plots of compound **3a**, B3LYP/6-31G(d).

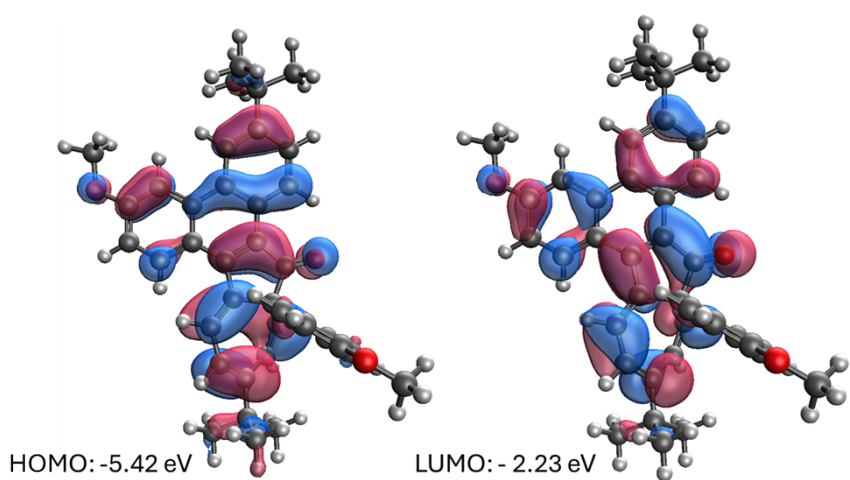

**Figure S18.** HOMO and LUMO plots of compound **3b**, B3LYP/6-31G(d).

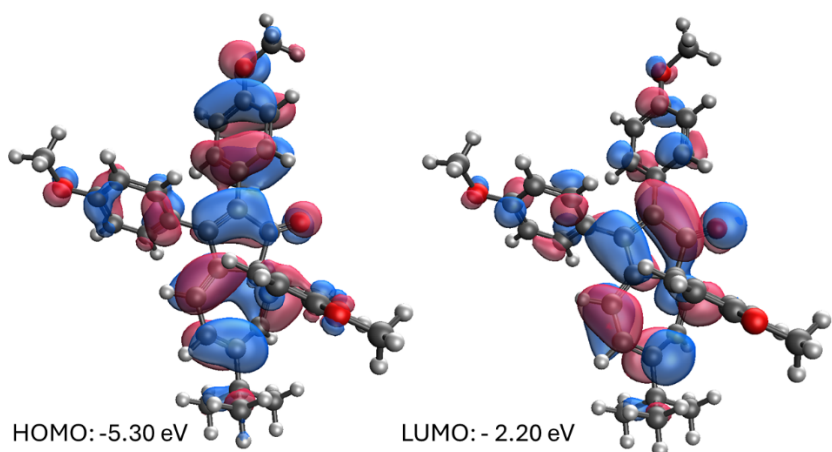

**Figure S19.** HOMO and LUMO plots of compound **3c**, B3LYP/6-31G(d).

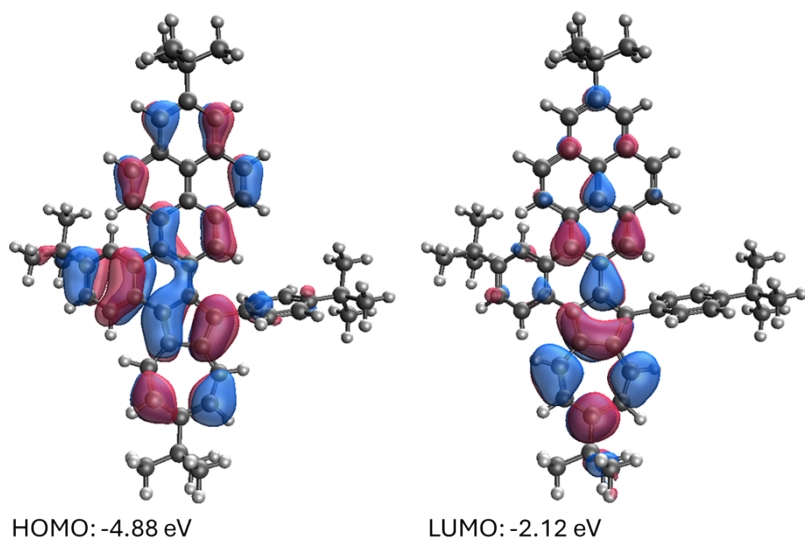

**Figure S20.** HOMO and LUMO plots of compound **4d**, B3LYP/6-31G(d).

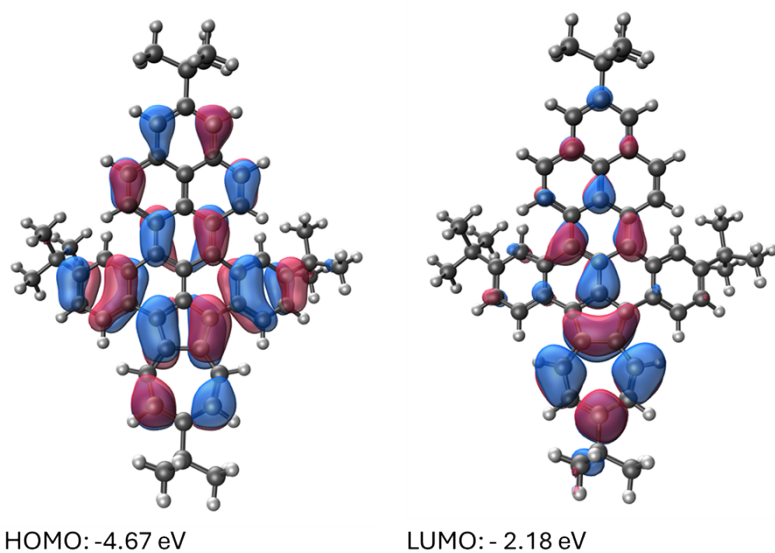

**Figure S21.** HOMO and LUMO plots of compound **2d**, B3LYP/6-31G(d).

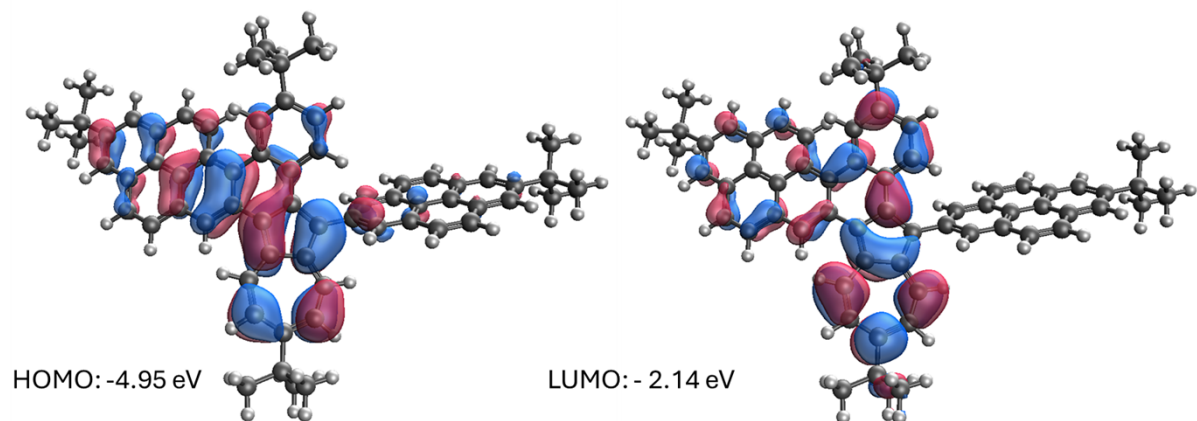

**Figure S22.** HOMO and LUMO plots of compound **4e**, B3LYP/6-31G(d).

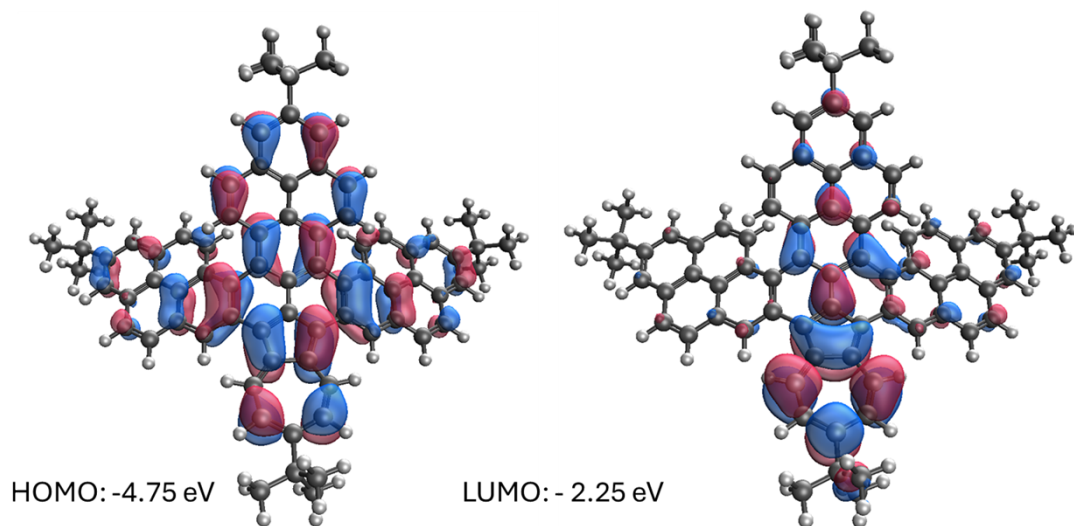

**Figure S23.** HOMO and LUMO plots of compound **2f**, B3LYP/6-31G(d).

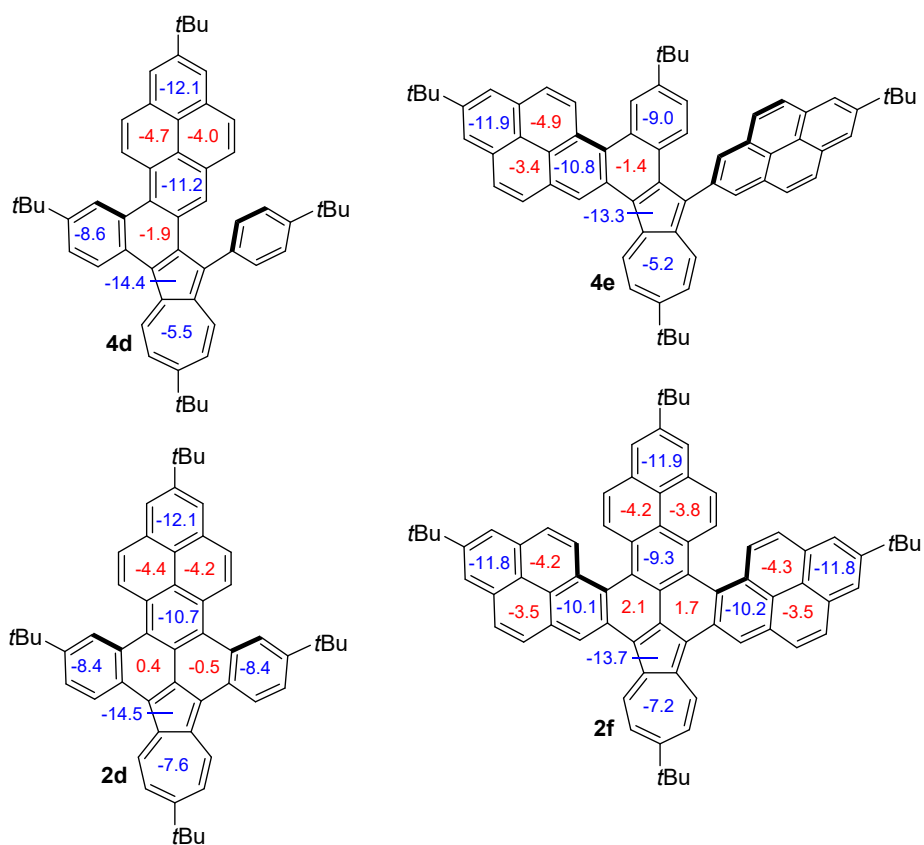

**Figure S24.** NICS(0) values of compounds **4d**, **2d**, **4e** and **2f**, B3LYP/6-31G(d).

### Analysis of electronic transitions

**Table S5.** Electronic transition contributing to UV/Vis/NIR spectrum of compound **4d**, B3LYP/6-31G(d).

| Transition               | Energy  | Wavelength | Oscillator strength | Contributions                                    |
|--------------------------|---------|------------|---------------------|--------------------------------------------------|
| $S_0 \rightarrow S_1$    | 2.01 eV | 617 nm     | f= 0.02360          | H -> L 92.9%, H-1 -> L 5.2%                      |
| $S_0 \rightarrow S_2$    | 2.63 eV | 471 nm     | f= 0.30900          | H -> L+1 90.4%                                   |
| $S_0 \rightarrow S_3$    | 2.69 eV | 460 nm     | f= 0.01710          | H-1 -> L 86.2%                                   |
| $S_0 \rightarrow S_4$    | 2.90 eV | 427 nm     | f= 0.50590          | H-2 -> L 68.7%, H -> L+2 26.0%                   |
| $S_0 \rightarrow S_5$    | 3.14 eV | 395 nm     | f= 1.29340          | H-1 -> L+1 78.3%, H -> L+2 10.8%, H-2 -> L 6.1%  |
| $S_0 \rightarrow S_6$    | 3.27 eV | 379 nm     | f= 0.11610          | H-2 -> L+1 83.9%, H -> L+3 6.5%                  |
| $S_0 \rightarrow S_7$    | 3.31 eV | 375 nm     | f= 0.64400          | H -> L+2 59.1%, H-2 -> L 18.2%, H-1 -> L+1 16.1% |
| $S_0 \rightarrow S_8$    | 3.59 eV | 345 nm     | f= 0.56990          | H-1 -> L+2 95.1%                                 |
| $S_0 \rightarrow S_9$    | 3.70 eV | 335 nm     | f= 0.35450          | H -> L+3 88.0%, H-2 -> L+1 6.2%                  |
| $S_0 \rightarrow S_{10}$ | 3.72 eV | 334 nm     | f= 0.11760          | H-2 -> L+2 77.5%, H-3 -> L 13.8%                 |

**Table S6.** Electronic transition contributing to UV/Vis/NIR spectrum of compound **2d**, B3LYP/6-31G(d).

| Transition               | Energy  | Wavelength | Oscillator strength | Contributions                                                         |
|--------------------------|---------|------------|---------------------|-----------------------------------------------------------------------|
| $S_0 \rightarrow S_1$    | 1.79 eV | 692 nm     | f= 0.01780          | H -> L 95.1%                                                          |
| $S_0 \rightarrow S_2$    | 2.30 eV | 540 nm     | f= 0.68030          | H -> L+1 95.3%                                                        |
| $S_0 \rightarrow S_3$    | 2.66 eV | 465 nm     | f= 0.01810          | H-1 -> L 89.8%                                                        |
| $S_0 \rightarrow S_4$    | 2.74 eV | 453 nm     | f= 0.06190          | H -> L+2 64.1%, H-2 -> L 28.2%                                        |
| $S_0 \rightarrow S_5$    | 2.97 eV | 418 nm     | f= 1.33470          | H-1 -> L+1 60.5%, H-2 -> L 31.9%                                      |
| $S_0 \rightarrow S_6$    | 3.06 eV | 405 nm     | f= 0.20060          | H-2 -> L+1 73.2%, H -> L+3 9.6%                                       |
| $S_0 \rightarrow S_7$    | 3.13 eV | 396 nm     | f= 0.55430          | H-1 -> L+1 30.0%, H-2 -> L 29.6%, H -> L+2 23.7%,<br>H-2 -> L+1 10.4% |
| $S_0 \rightarrow S_8$    | 3.43 eV | 361 nm     | f= 0.52820          | H -> L+3 80.2%, H-2 -> L+1 10.5%                                      |
| $S_0 \rightarrow S_9$    | 3.49 eV | 355 nm     | f= 0.50040          | H-1 -> L+2 96.5%                                                      |
| $S_0 \rightarrow S_{10}$ | 3.59 eV | 345 nm     | f= 0.00920          | H-2 -> L+2 85.3%                                                      |

**Table S7.** Electronic transition contributing to UV/Vis/NIR spectrum of compound **4e**, B3LYP/6-31G(d).

| Transition               | Energy  | Wavelength | Oscillator strength | Contributions                                          |
|--------------------------|---------|------------|---------------------|--------------------------------------------------------|
| $S_0 \rightarrow S_1$    | 2.05 eV | 605 nm     | f= 0.03730          | H -> L 95.0%                                           |
| $S_0 \rightarrow S_2$    | 2.58 eV | 480 nm     | f= 0.21780          | H-1 -> L 92.3%                                         |
| $S_0 \rightarrow S_3$    | 2.77 eV | 448 nm     | f= 0.04220          | H -> L+1 87.7%                                         |
| $S_0 \rightarrow S_4$    | 2.86 eV | 434 nm     | f= 0.00620          | H-2 -> L 97.1%                                         |
| $S_0 \rightarrow S_5$    | 2.89 eV | 429 nm     | f= 0.08580          | H -> L+2 68.5%, H-3 -> L 22.4%                         |
| $S_0 \rightarrow S_6$    | 2.94 eV | 422 nm     | f= 0.00550          | H -> L+3 40.5%, H-3 -> L 27.3%, H -> L+2 22.7%         |
| $S_0 \rightarrow S_7$    | 3.11 eV | 399 nm     | f= 1.22720          | H-1 -> L+1 65.4%, H -> L+3 17.9%, H-1 -> L+2<br>5.5%   |
| $S_0 \rightarrow S_8$    | 3.24 eV | 383 nm     | f= 0.10450          | H-1 -> L+2 54.7%, H-1 -> L+3 27.6%, H-1 -> L+1<br>9.5% |
| $S_0 \rightarrow S_9$    | 3.26 eV | 381 nm     | f= 1.10830          | H-3 -> L 42.1%, H -> L+3 28.9%, H-1 -> L+1 15.0%       |
| $S_0 \rightarrow S_{10}$ | 3.35 eV | 371 nm     | f= 0.00180          | H-1 -> L+3 57.3%, H-1 -> L+2 35.4%                     |

**Table S8.** Electronic transition contributing to UV/Vis/NIR spectrum of compound **2f**, B3LYP/6-31G(d).

| Transition               | Energy  | Wavelength | Oscillator strength | Contributions                                                       |
|--------------------------|---------|------------|---------------------|---------------------------------------------------------------------|
| $S_0 \rightarrow S_1$    | 1.83 eV | 677 nm     | f= 0.04930          | H -> L 91.4%, H-1 -> L 5.5%                                         |
| $S_0 \rightarrow S_2$    | 2.21 eV | 560 nm     | f= 0.38040          | H -> L+1 94.9%                                                      |
| $S_0 \rightarrow S_3$    | 2.40 eV | 516 nm     | f= 0.13420          | H-1 -> L 90.2%, H -> L 6.1%                                         |
| $S_0 \rightarrow S_4$    | 2.51 eV | 494 nm     | f= 0.07640          | H-2 -> L 63.8%, H -> L+2 28.0%                                      |
| $S_0 \rightarrow S_5$    | 2.63 eV | 472 nm     | f= 0.34180          | H-1 -> L+1 76.2%, H-2 -> L 13.7%, H -> L+2 5.4%                     |
| $S_0 \rightarrow S_6$    | 2.65 eV | 469 nm     | f= 0.00850          | H -> L+3 80.1%, H-2 -> L+1 11.0%                                    |
| $S_0 \rightarrow S_7$    | 2.68 eV | 462 nm     | f= 0.81920          | H-2 -> L+1 81.0%, H -> L+3 9.6%                                     |
| $S_0 \rightarrow S_8$    | 2.72 eV | 456 nm     | f= 0.58530          | H -> L+2 52.2%, H-2 -> L 17.2%, H-1 -> L+1 14.5%, H-3 -> L 7.7%     |
| $S_0 \rightarrow S_9$    | 2.98 eV | 416 nm     | f= 0.25920          | H -> L+4 40.2%, H-3 -> L 37.8%, H-1 -> L+2 13.6%                    |
| $S_0 \rightarrow S_{10}$ | 3.04 eV | 408 nm     | f= 0.01830          | H-3 -> L+1 38.1%, H-1 -> L+3 23.4%, H -> L+5 20.4%, H-2 -> L+2 7.5% |



# NMR Spectra

## Compound 5, 2-(6-(*tert*-butyl)azulen-2-yl)-4,4,5,5-tetramethyl-1,3,2-dioxaborolane

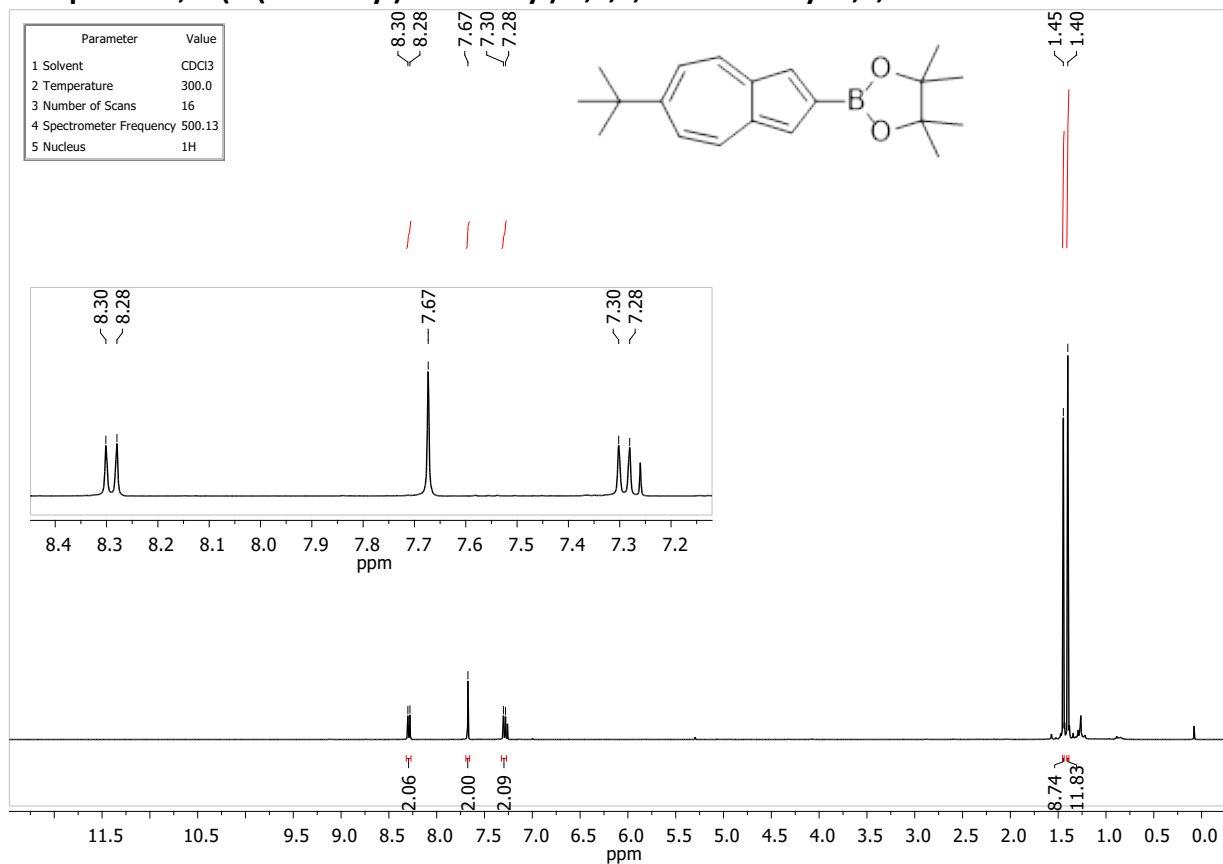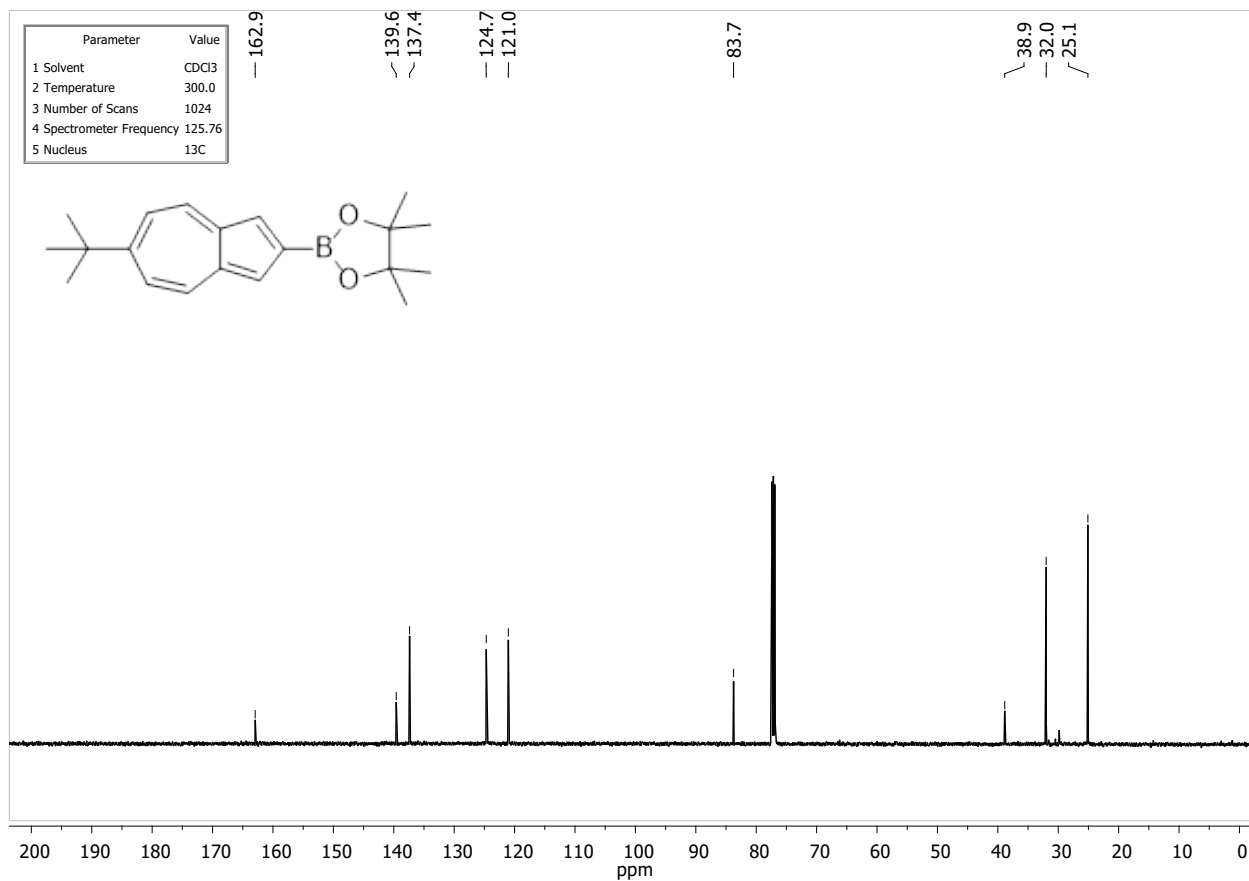

# Compound 6a, 6-(*tert*-butyl)-2-(4-(*tert*-butyl)phenyl)azulene

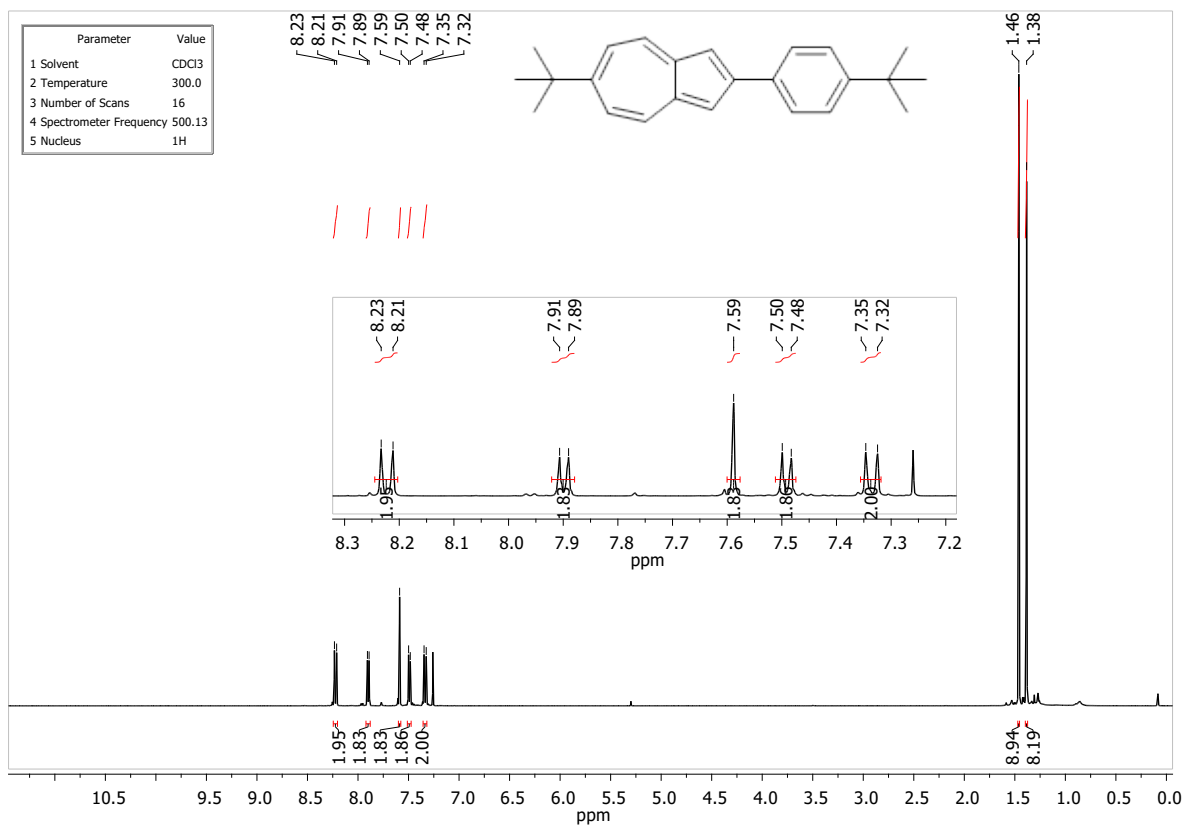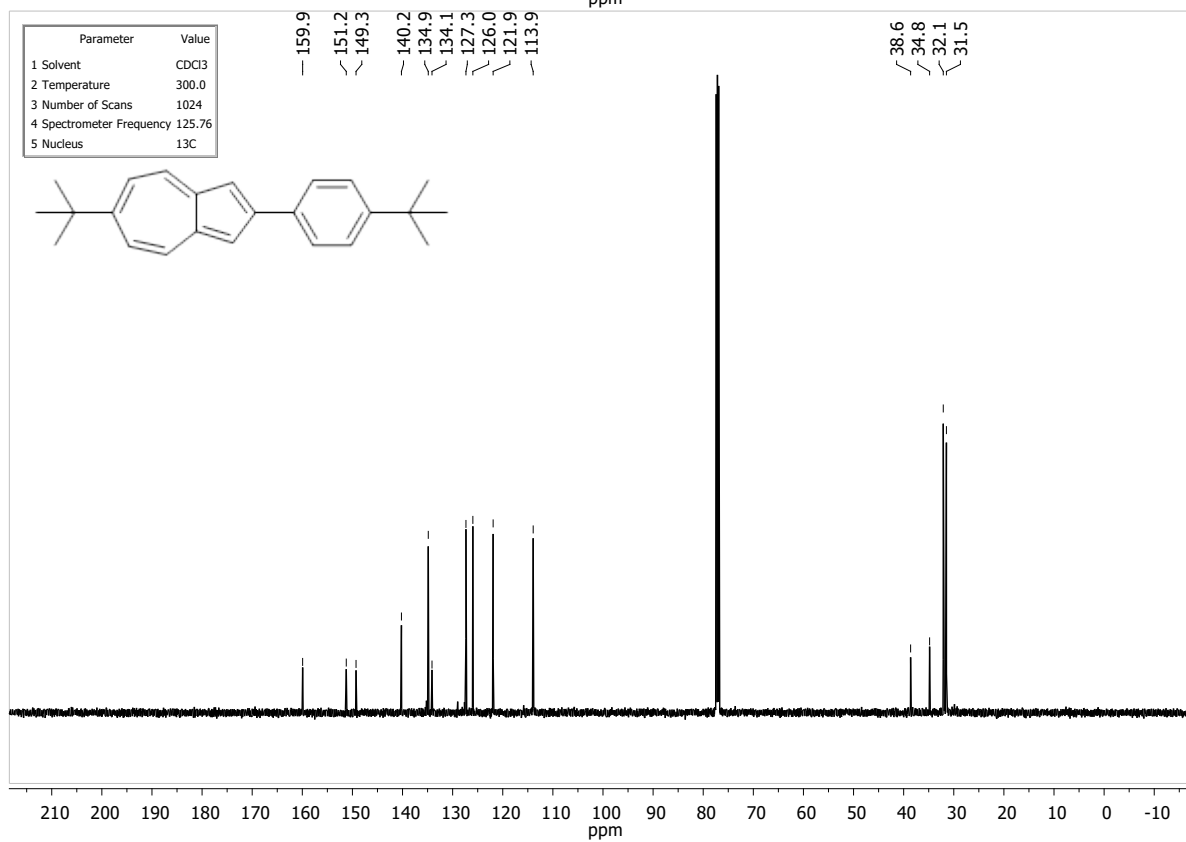

# Compound 6b, 6-(*tert*-butyl)-2-(4-methoxyphenyl)azulene

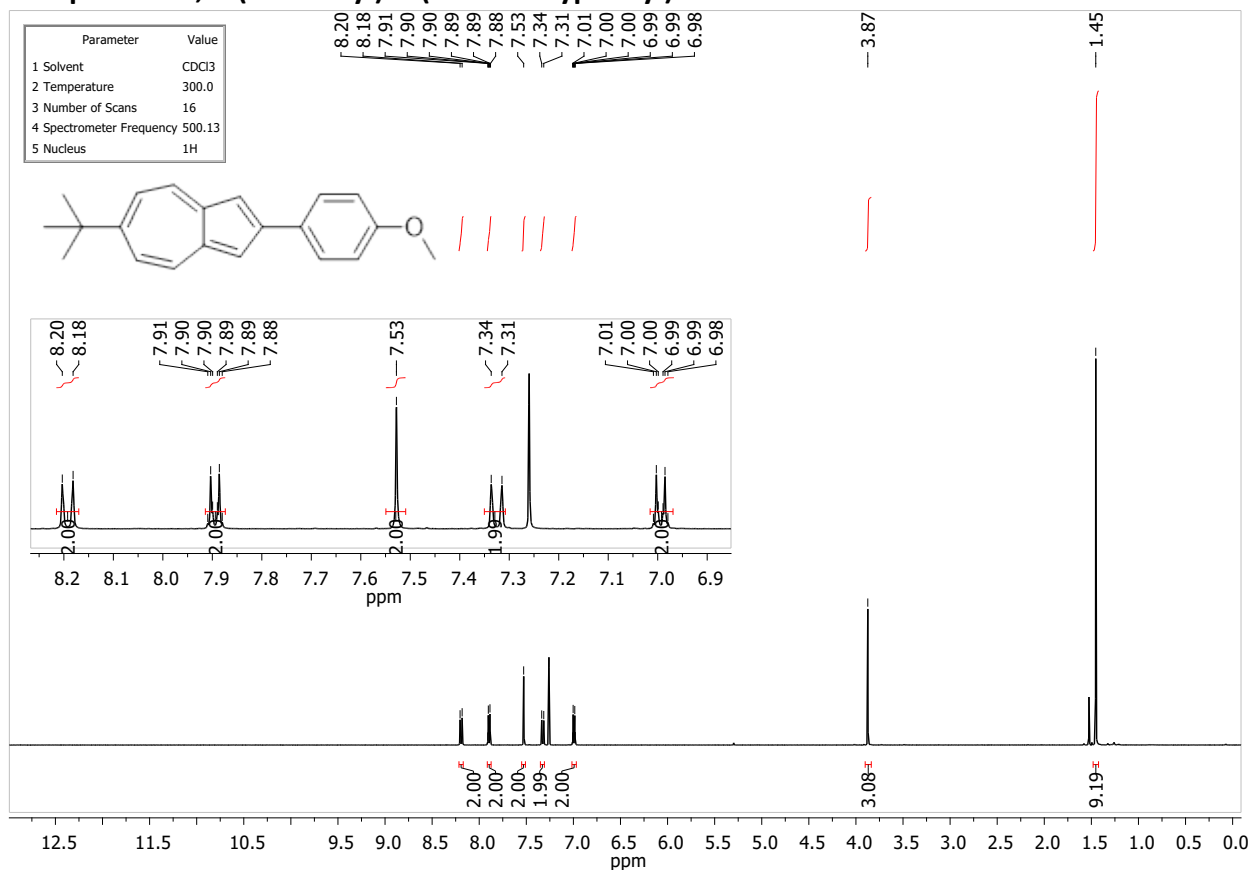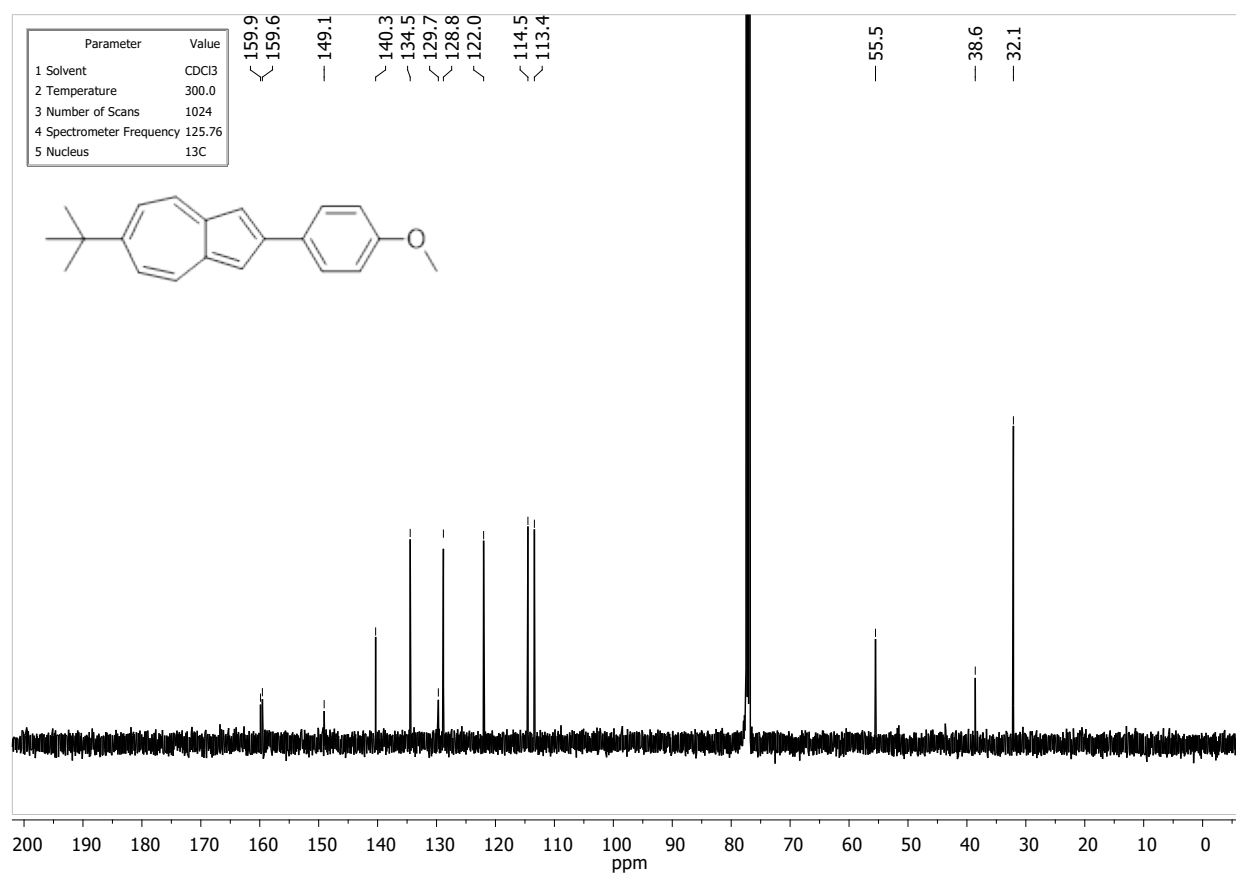

**Compound 6c, 2-(*tert*-butyl)-7-(6-(*tert*-butyl)azulen-2-yl)pyrene**

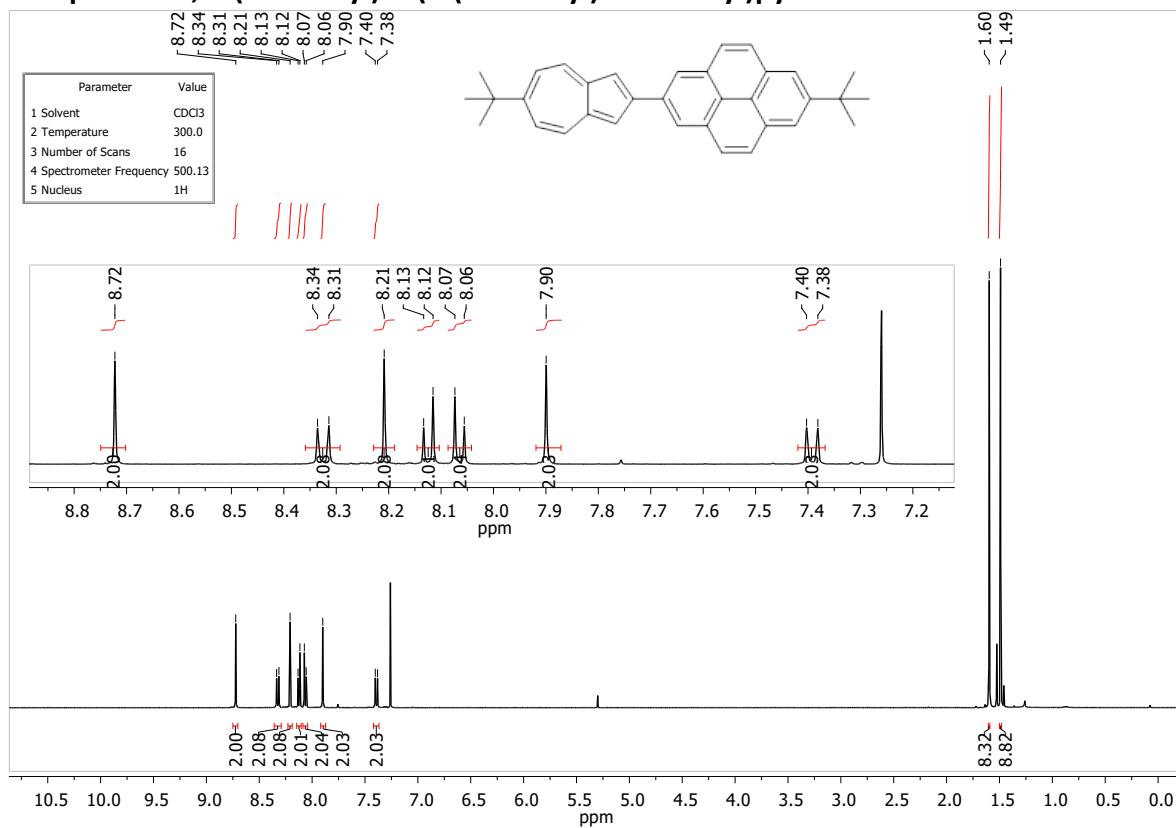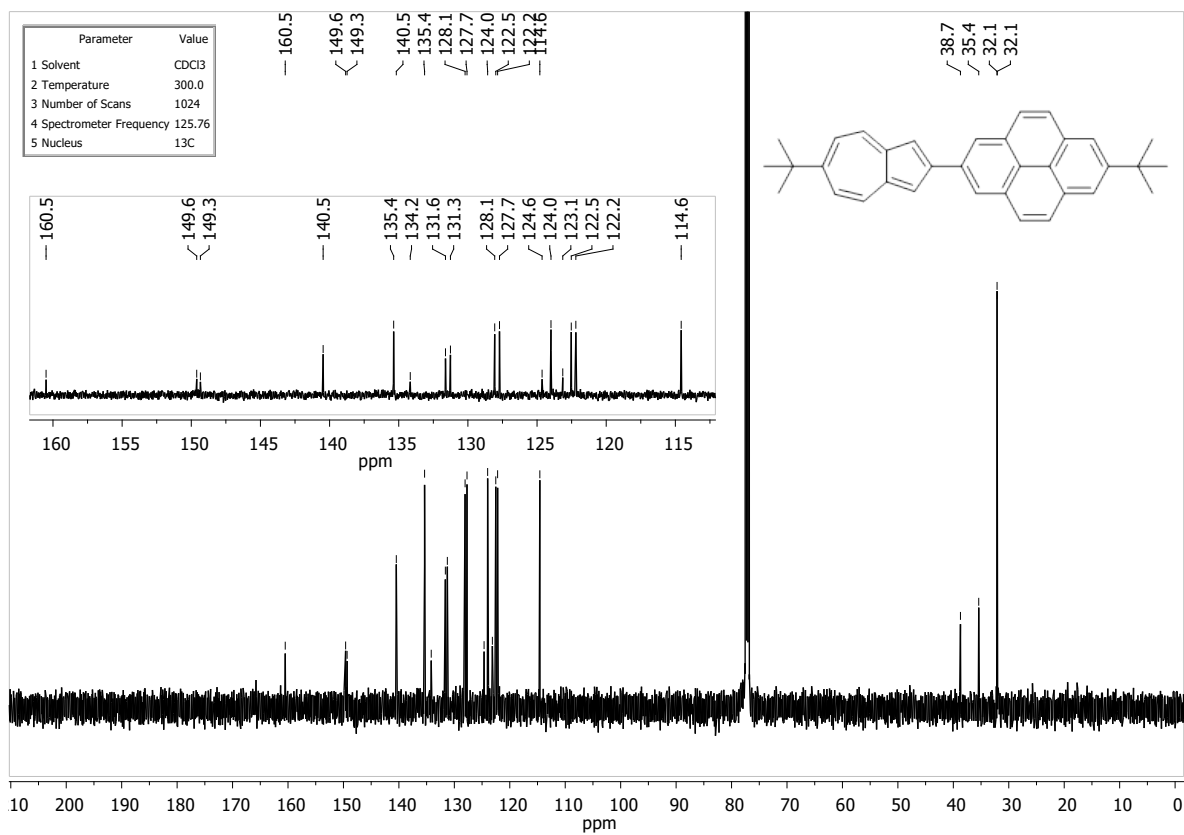

### Compound 7a, 6-(*tert*-butyl)-2-(4-(*tert*-butyl)phenyl)-1,3-diiodoazulene

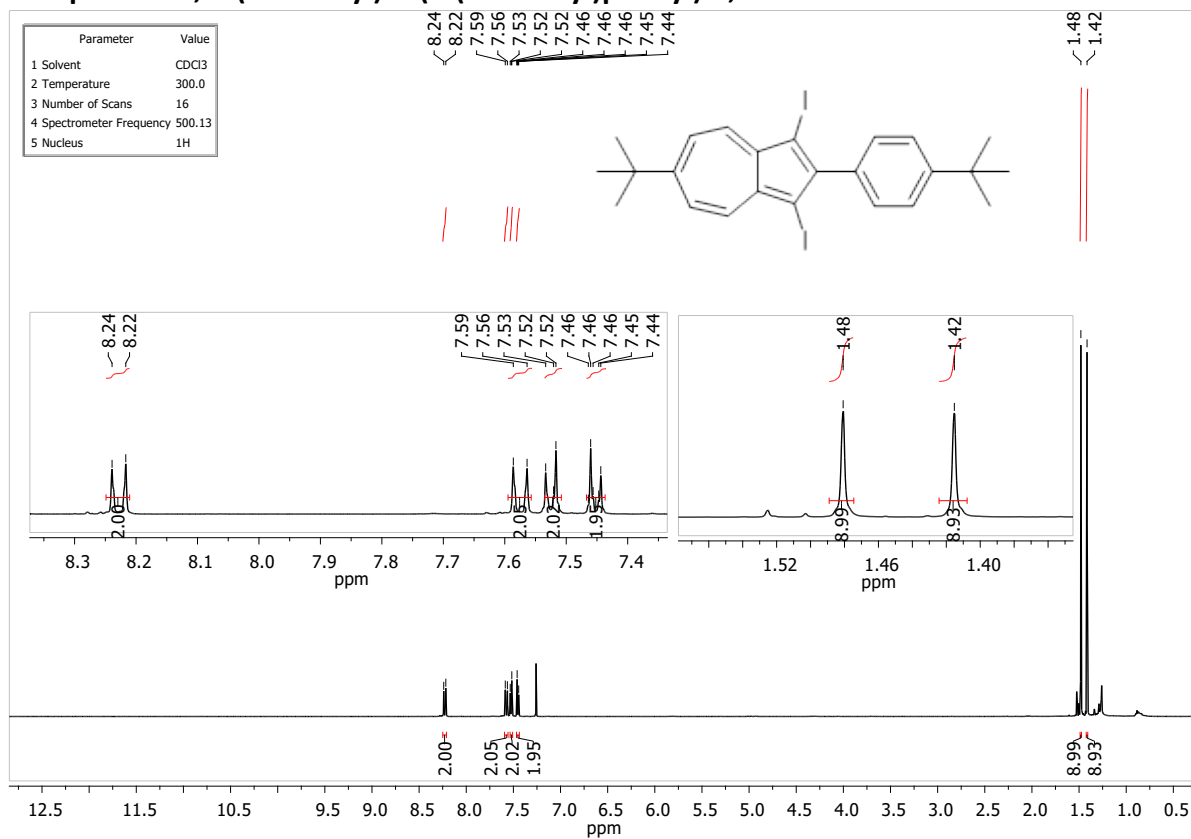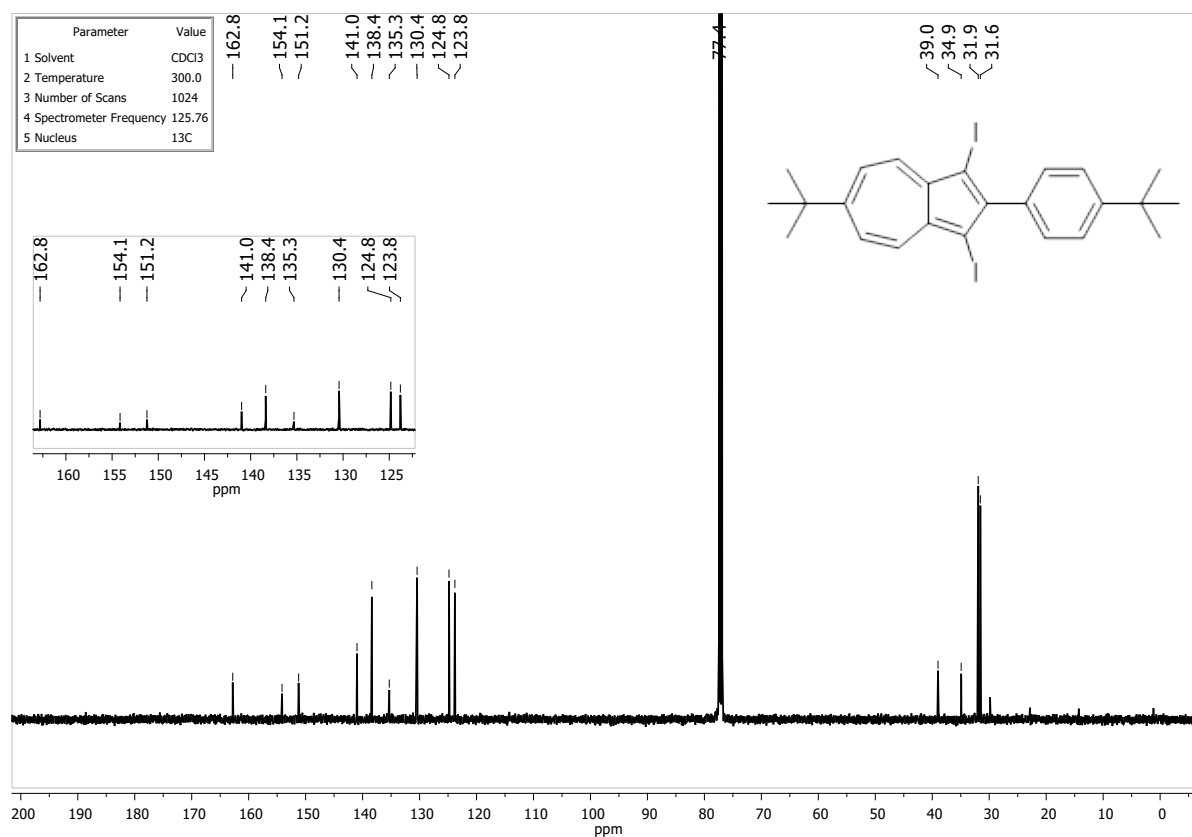

**Compound 7b, 6-(*tert*-butyl)-1,3-diiodo-2-(4-methoxyphenyl)azulene**

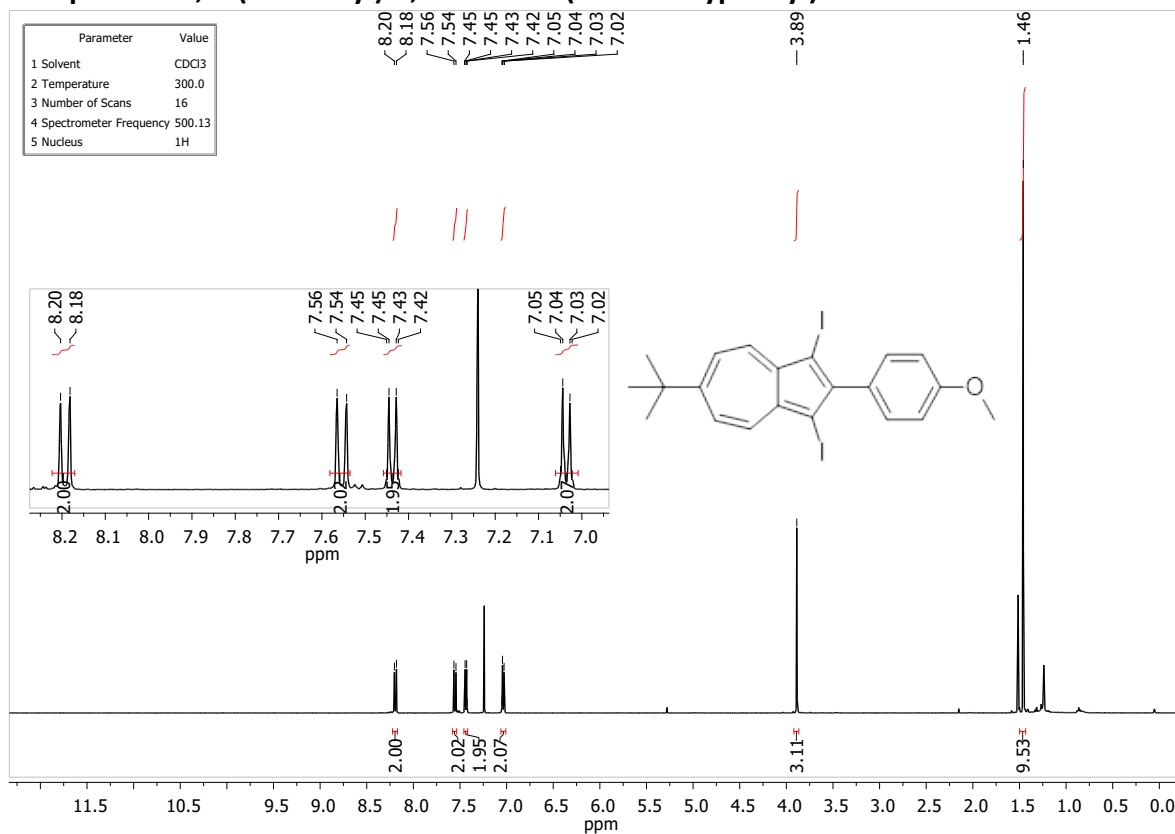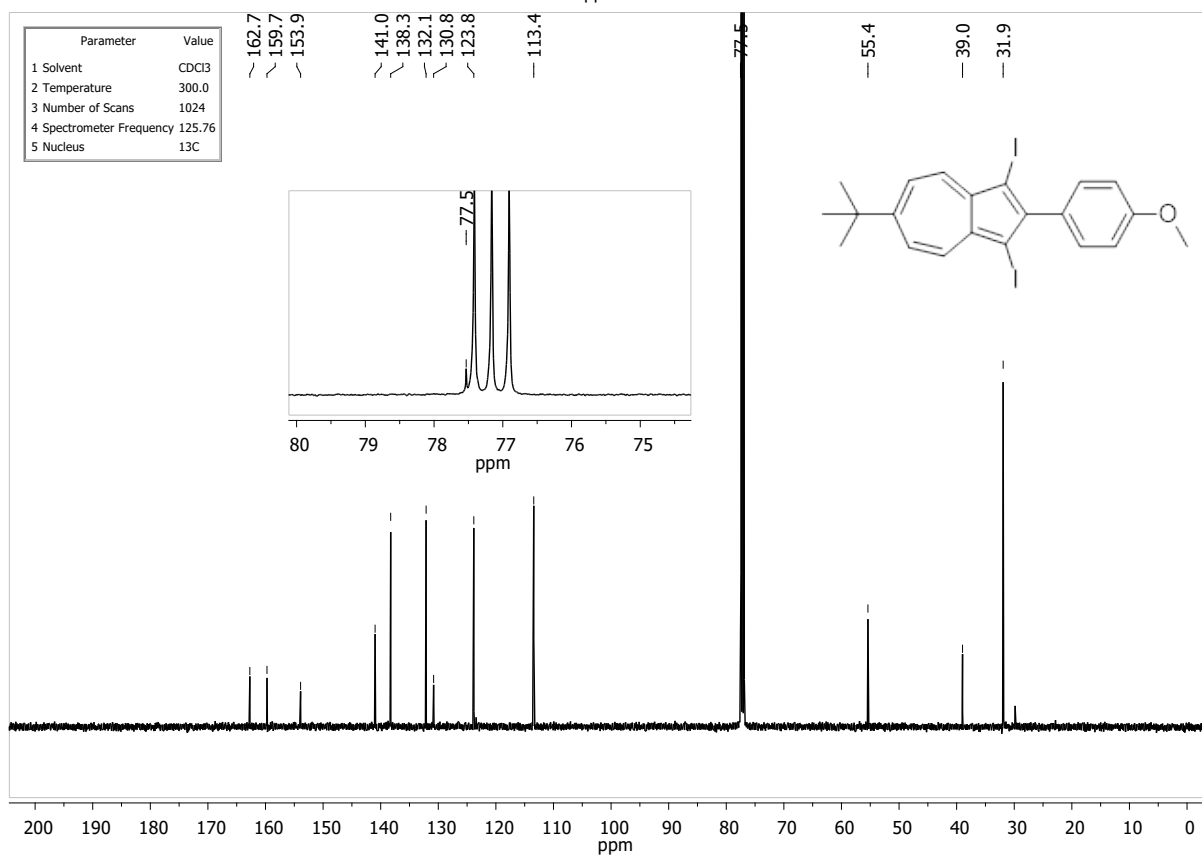

### Compound 7c, 2-(*tert*-butyl)-7-(6-(*tert*-butyl)-1,3-diiodoazulen-2-yl)pyrene

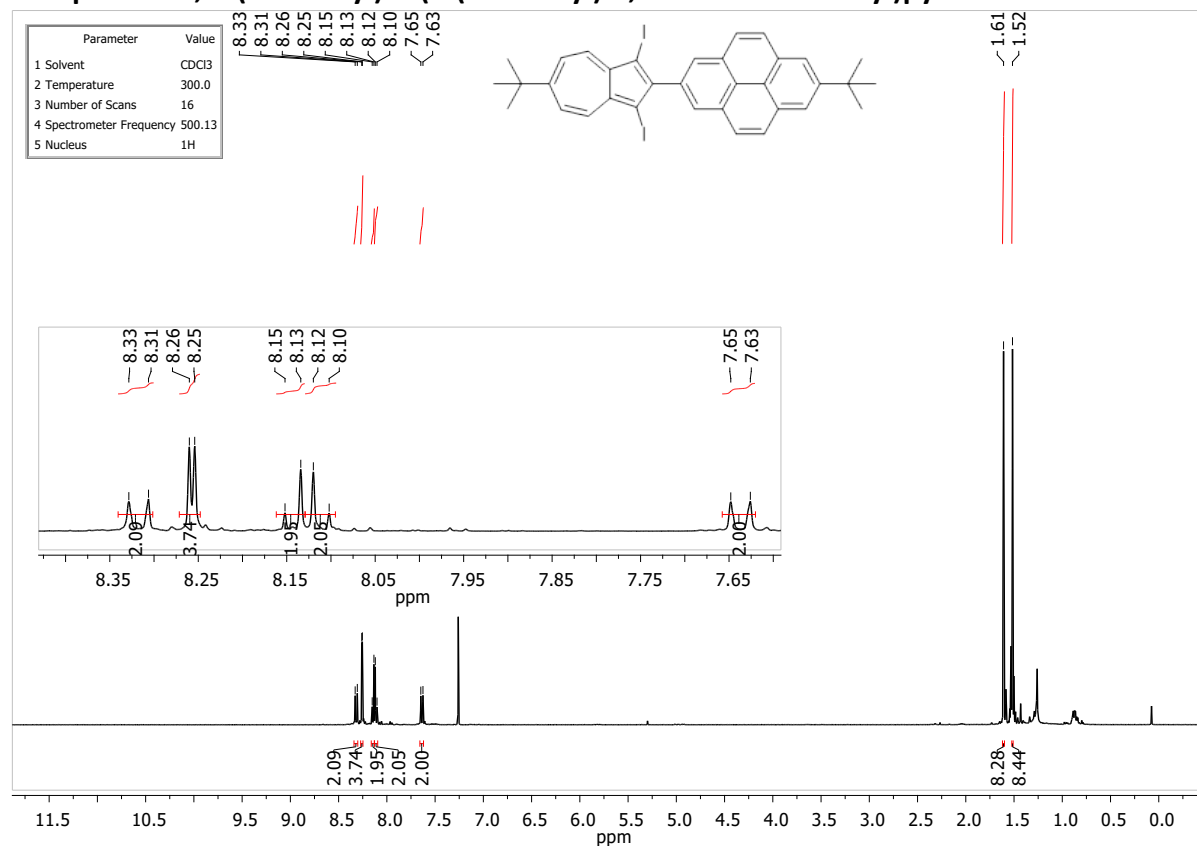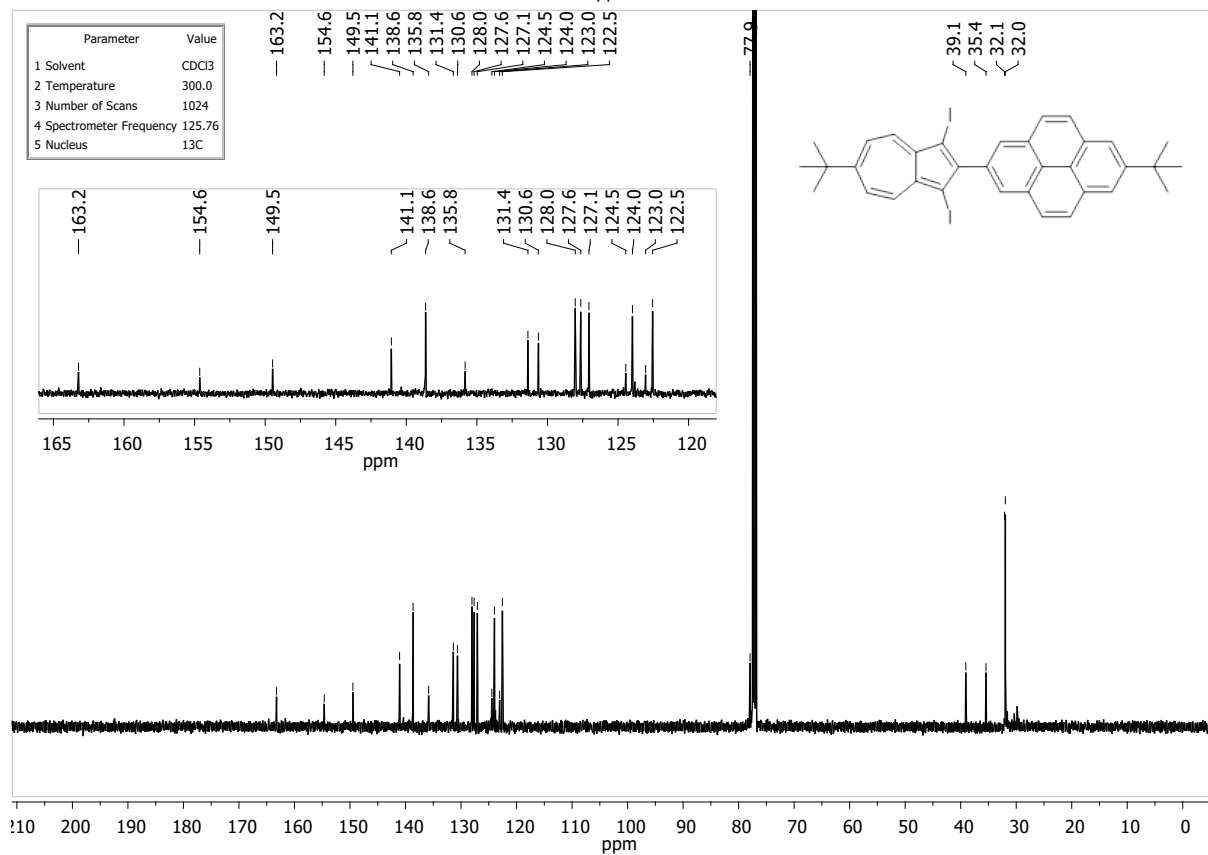

# Compound 1a, 6-(*tert*-butyl)-1,2,3-tris(4-(*tert*-butyl)phenyl)azulene

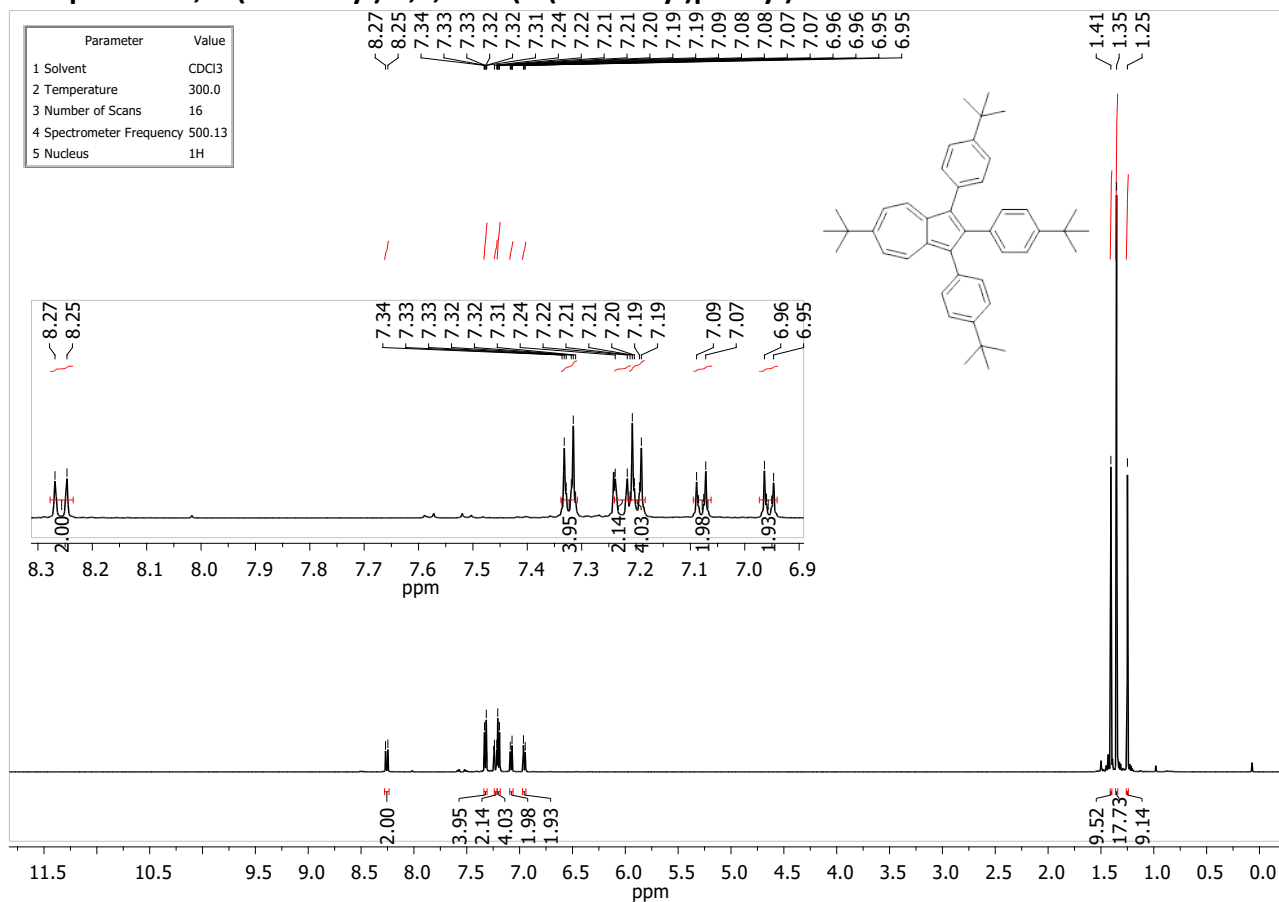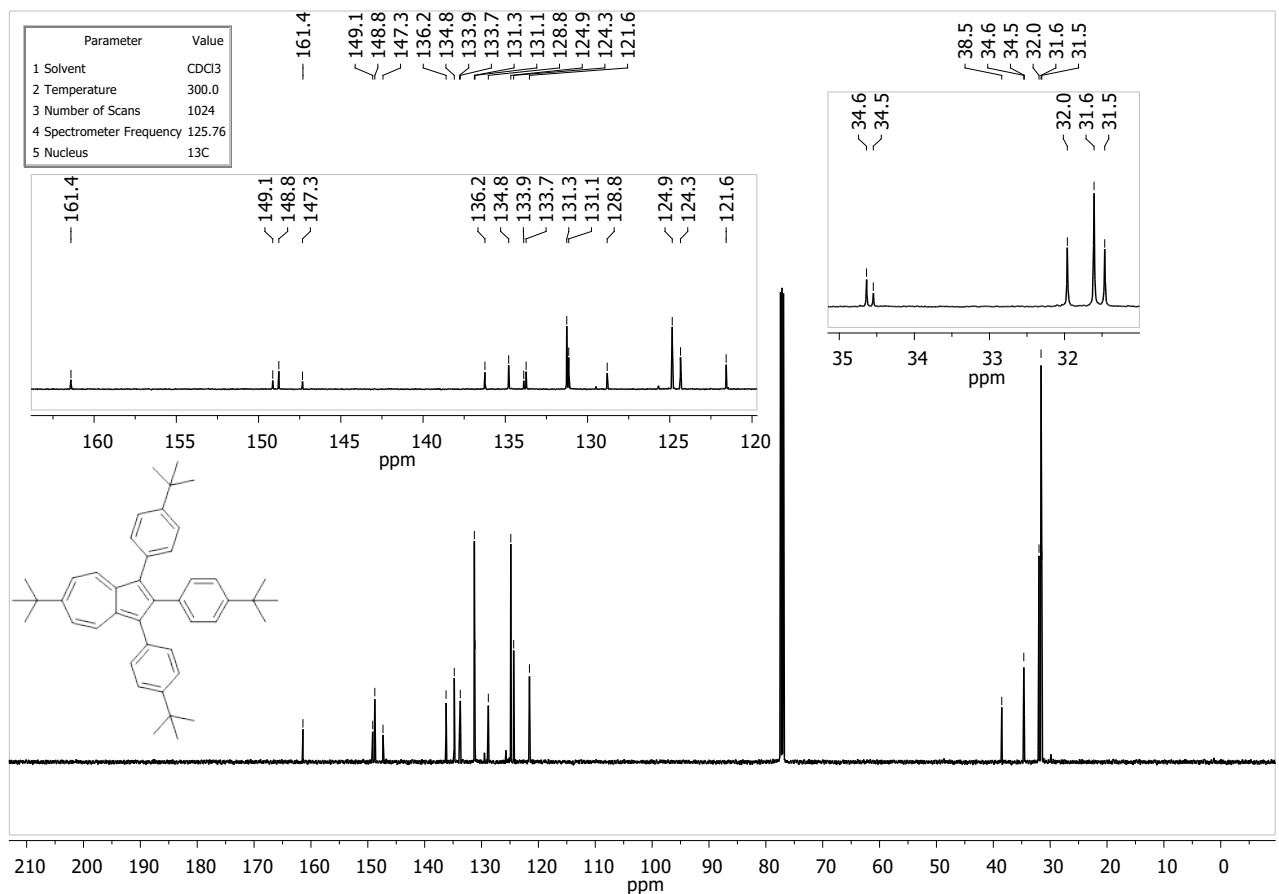



**Compound 1b, 6-(*tert*-butyl)-2-(4-(*tert*-butyl)phenyl)-1,3-bis(4-methoxyphenyl)azulene**

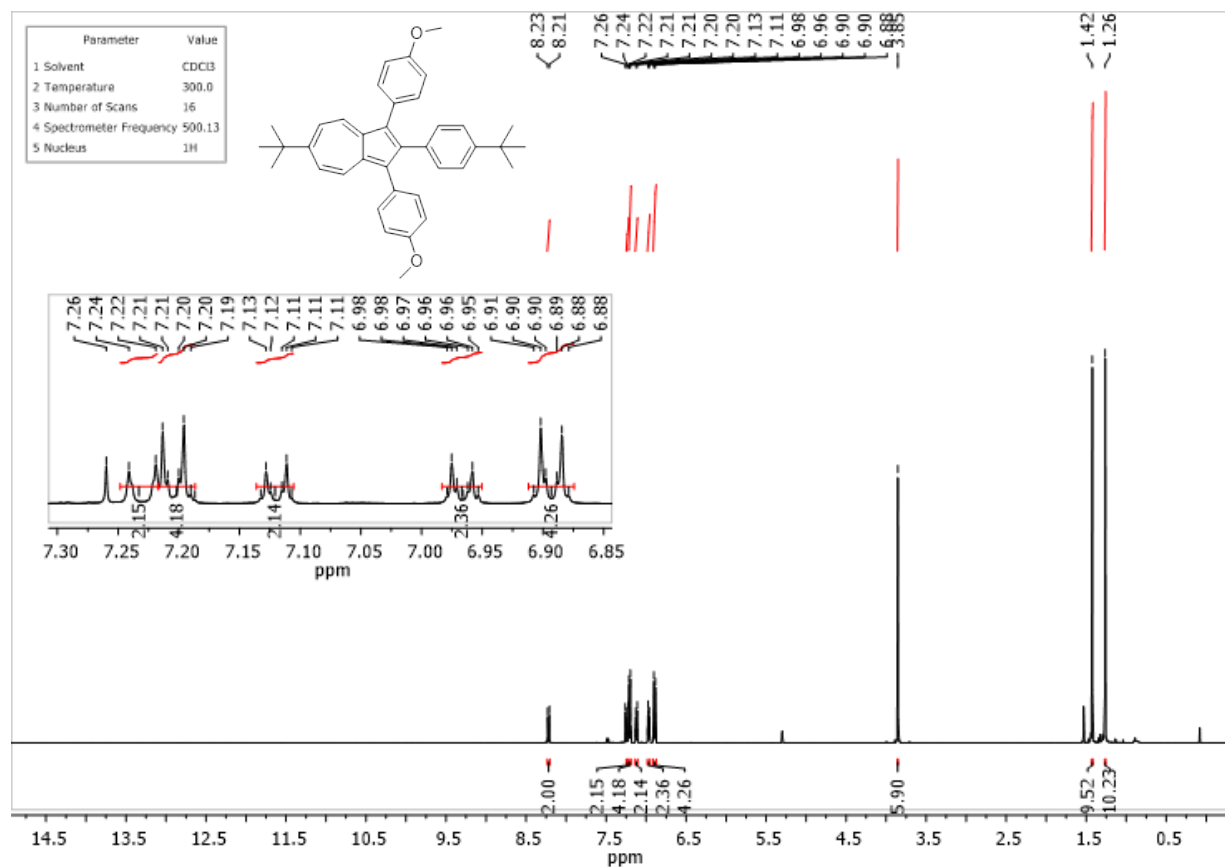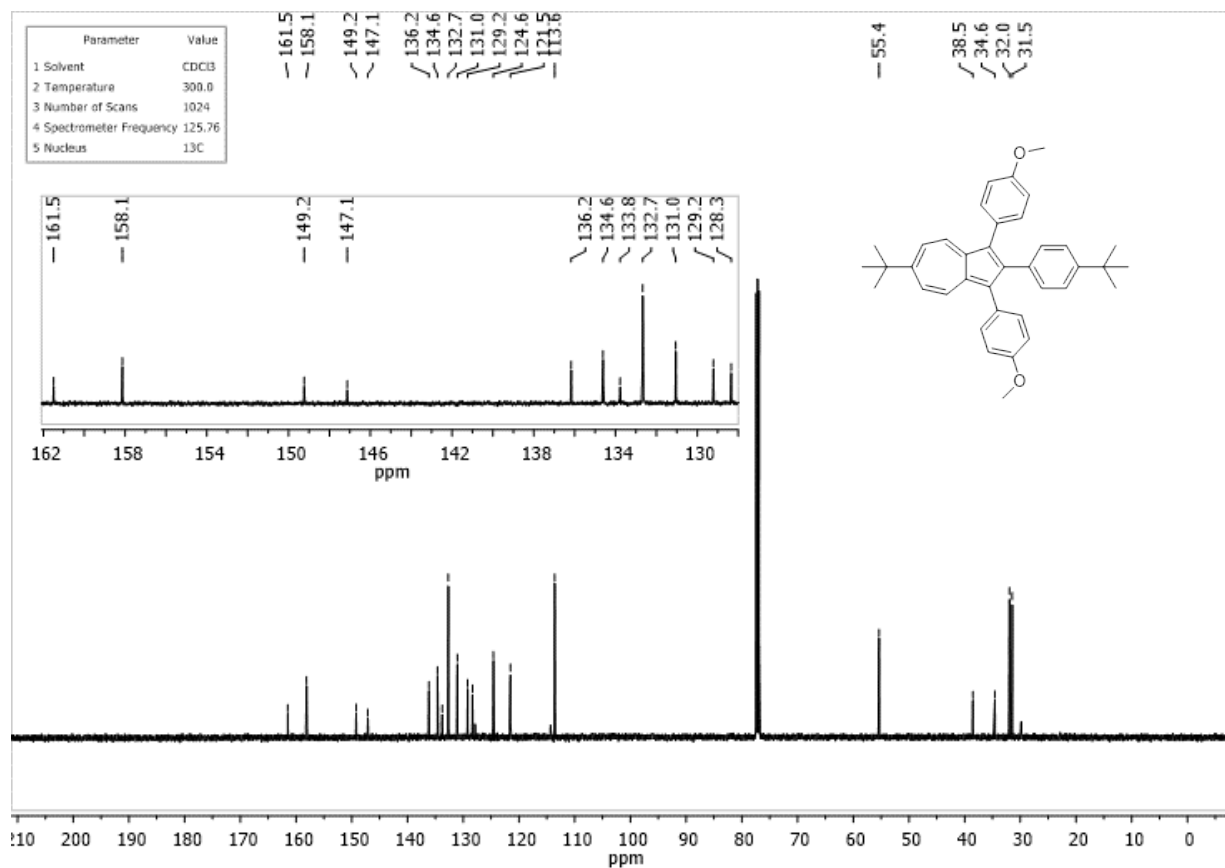

# Compound 1c, 6-(*tert*-butyl)-1,2,3-tris(4-methoxyphenyl)azulene

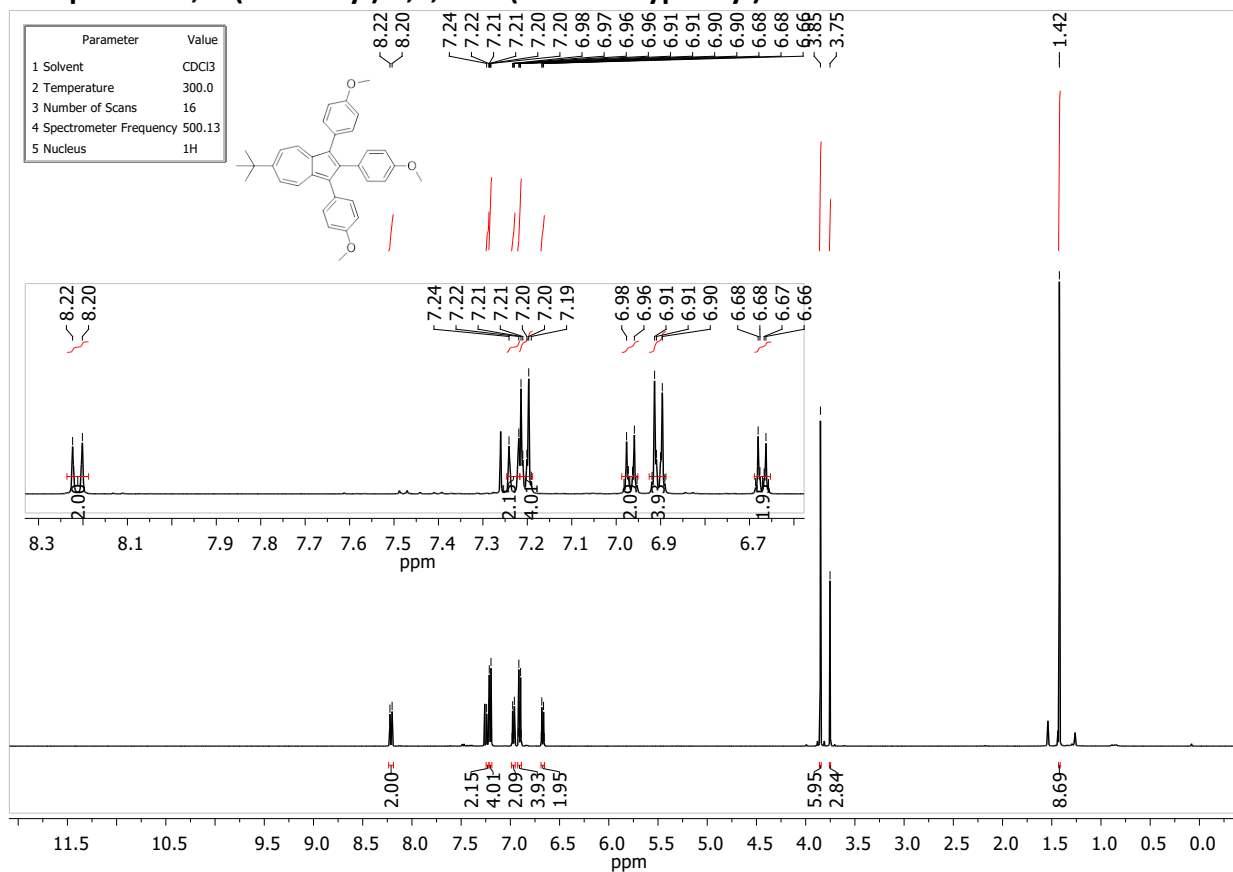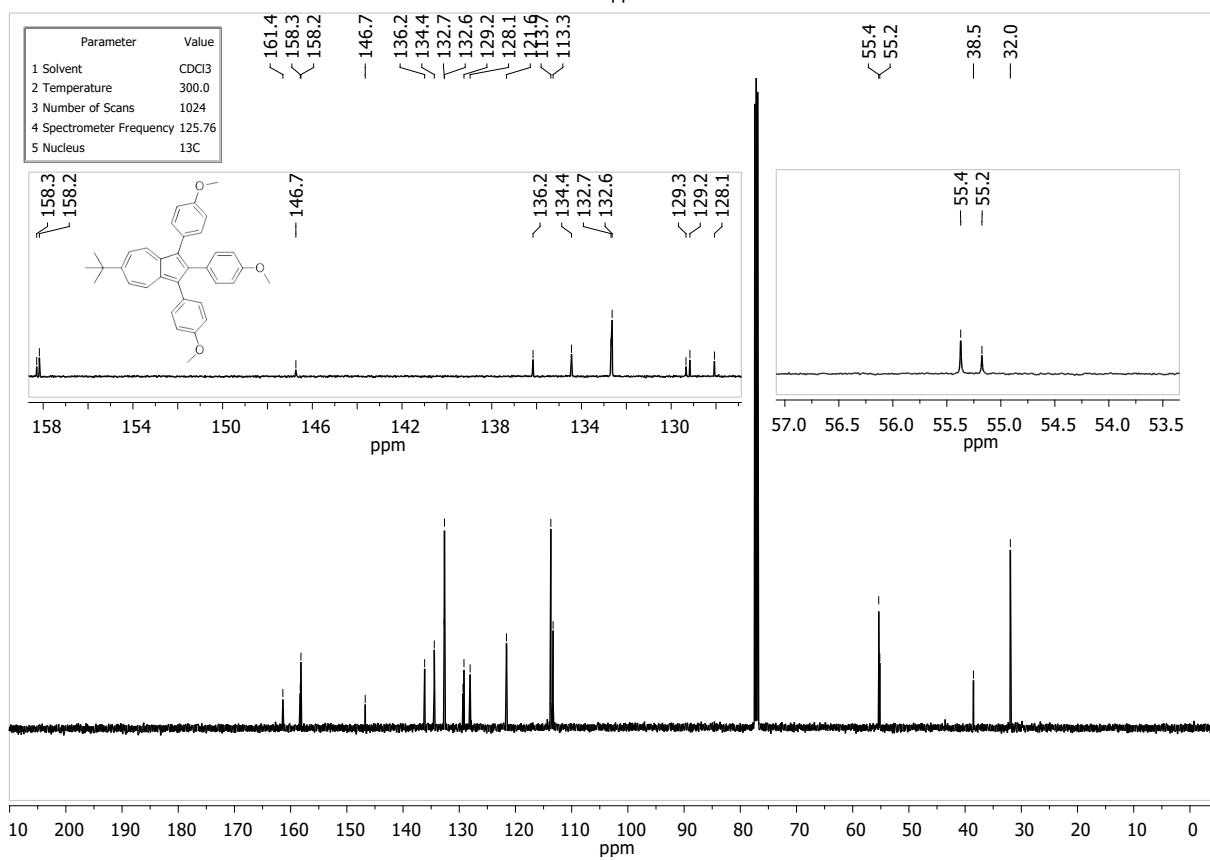

**Compound 1d, 2-(*tert*-butyl)-7-(6-(*tert*-butyl)-1,3-bis(4-(*tert*-butyl)phenyl)azulen-2-yl)pyrene**

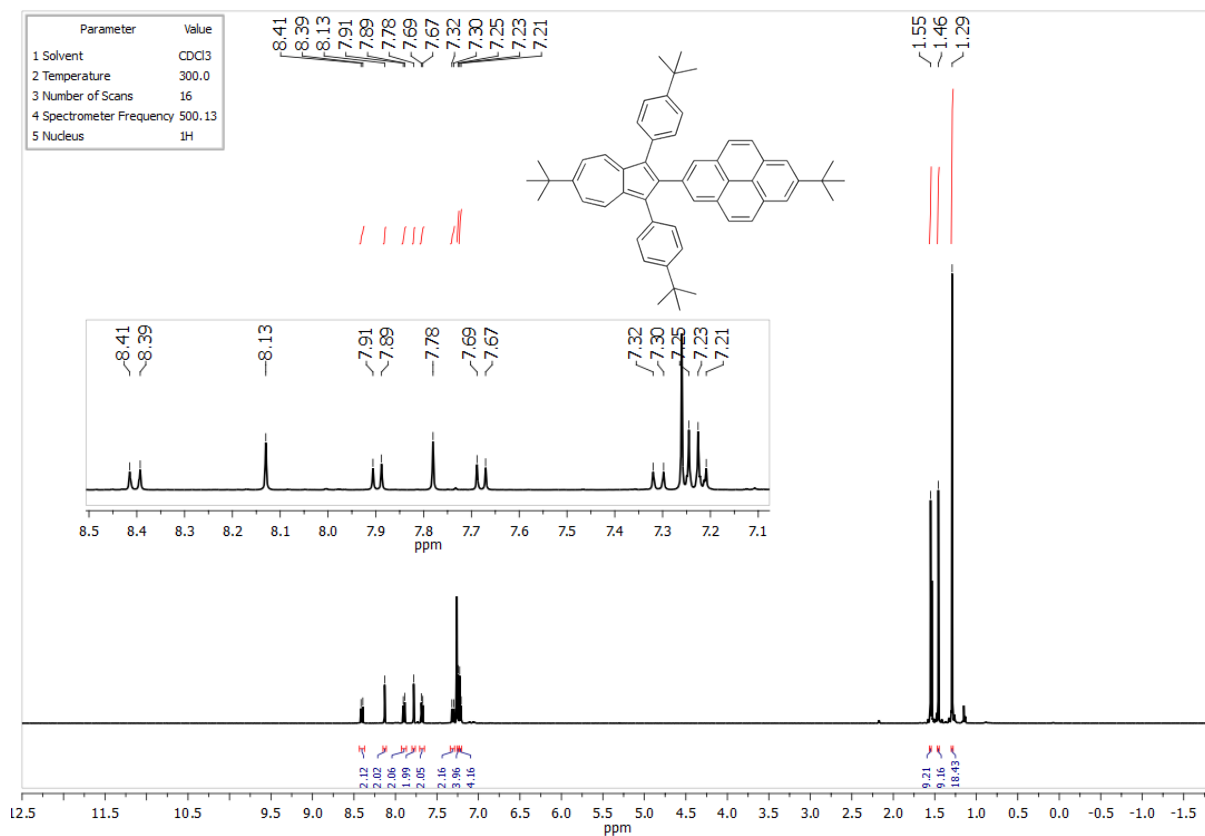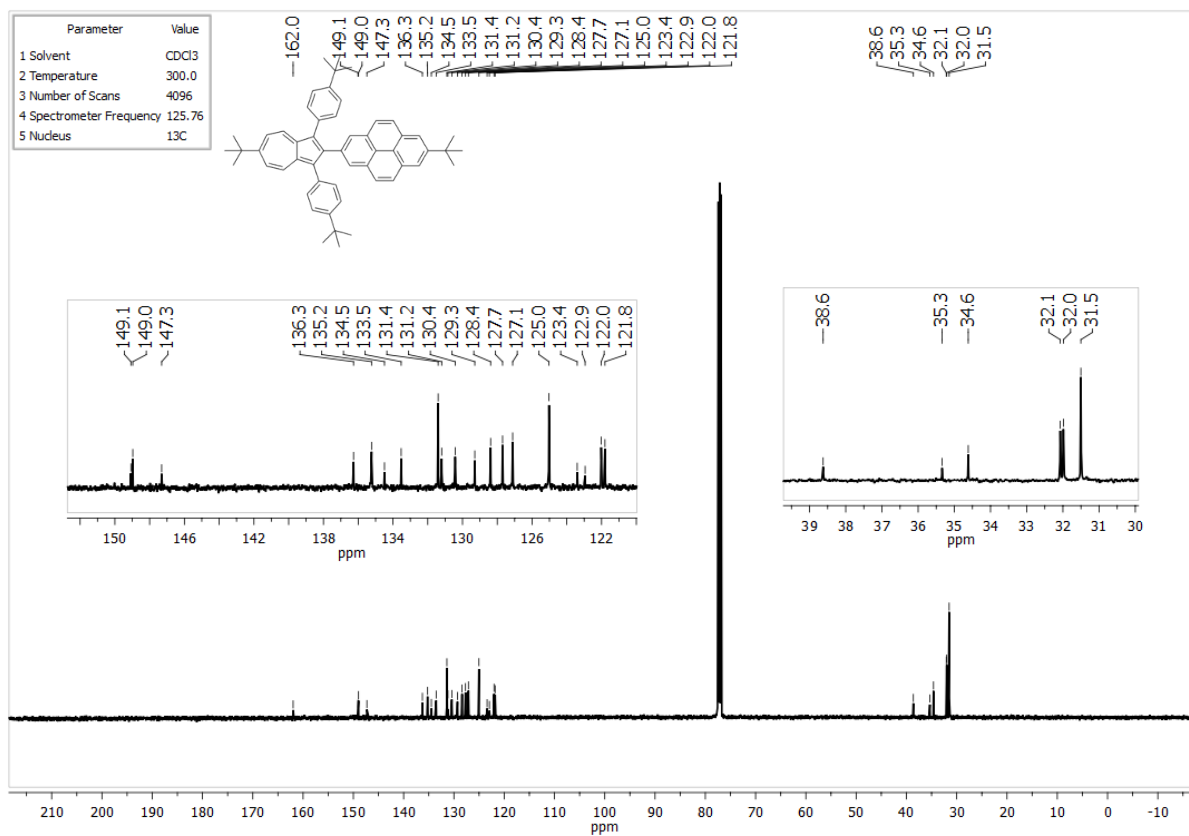

**Compound 1e, 7,7'-(6-(tert-butyl)-2-(4-(tert-butyl)phenyl)azulene-1,3-diyl)bis(2-(tert-butyl)pyrene)**

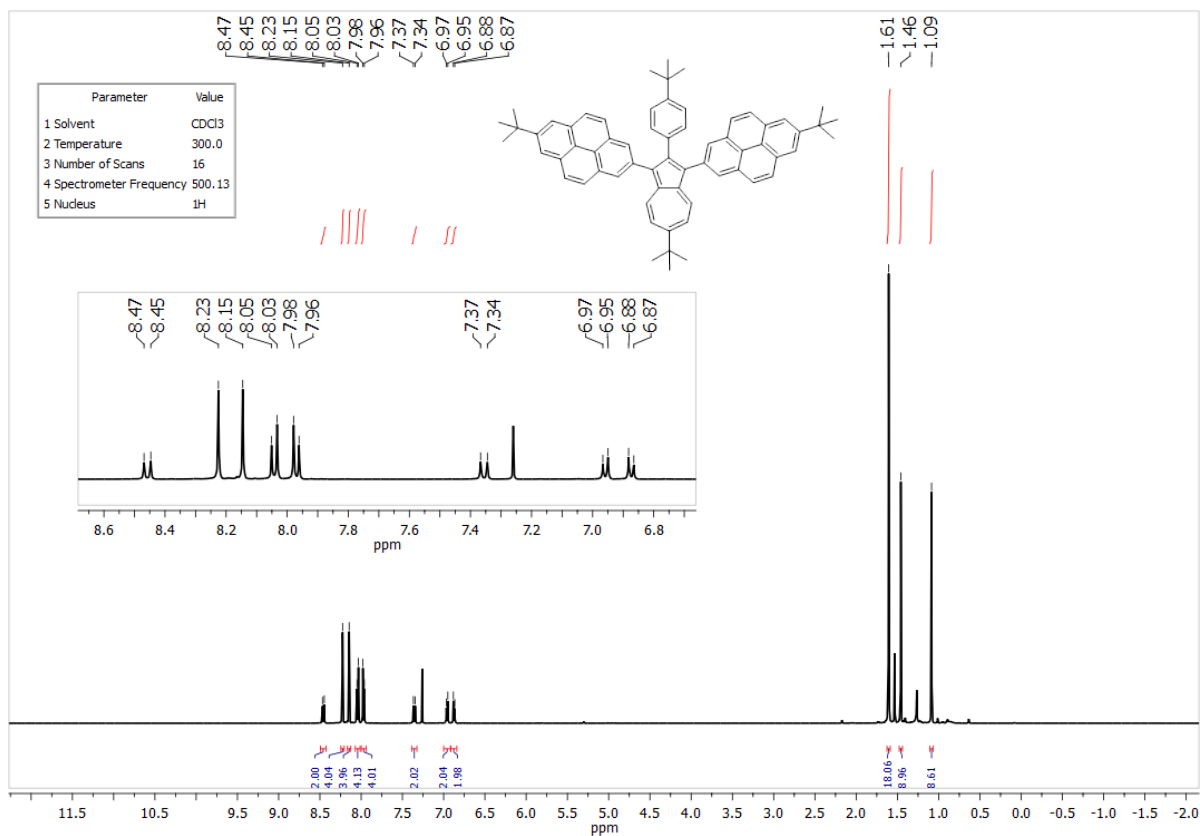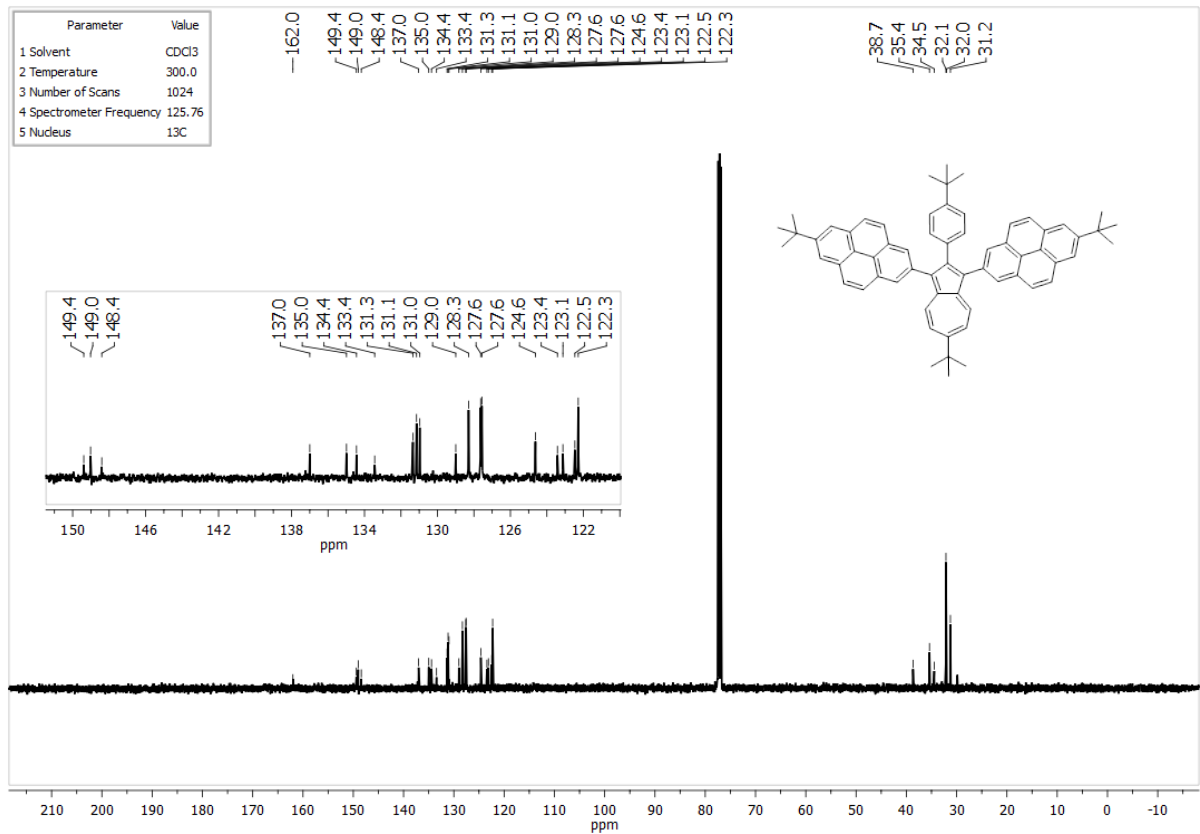

**Compound 1f, 7,7',7''-(6-(tert-butyl)azulene-1,2,3-triyl)tris(2-(tert-butyl)pyrene)**

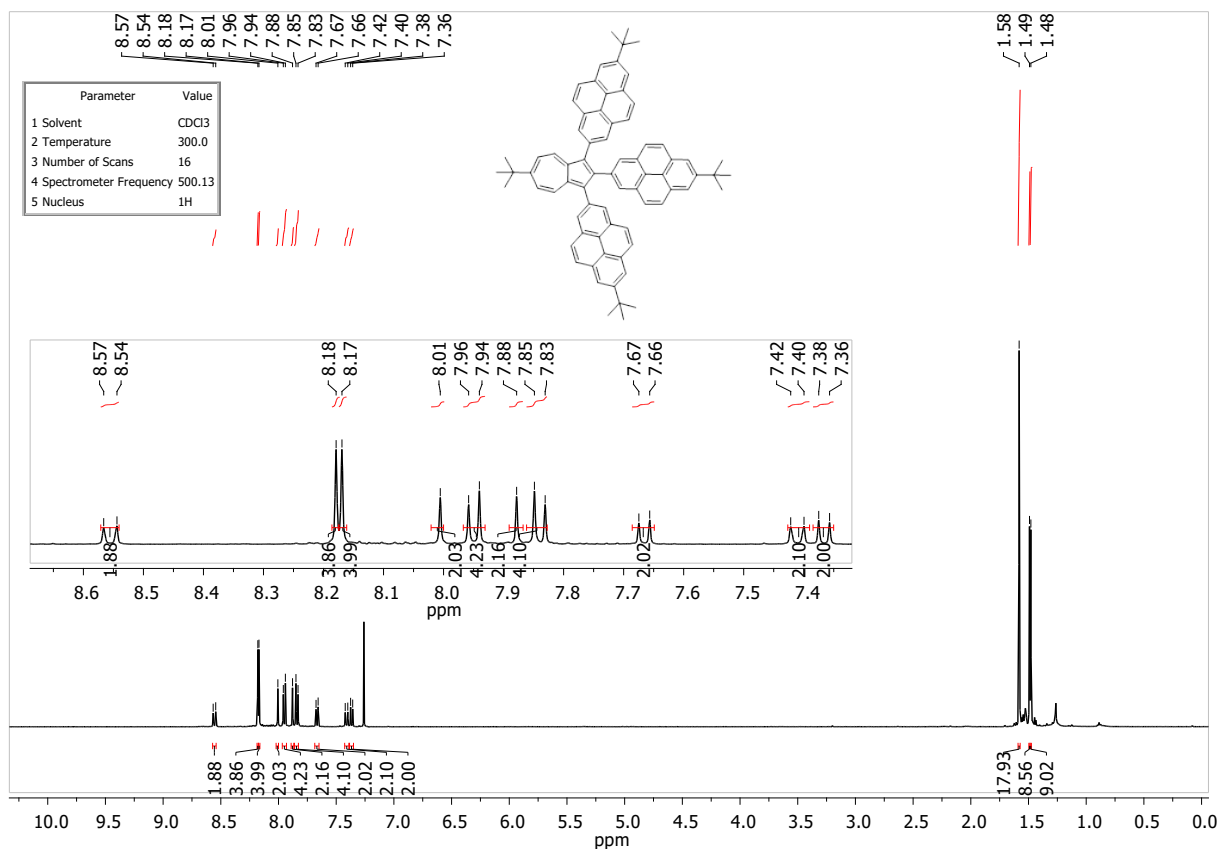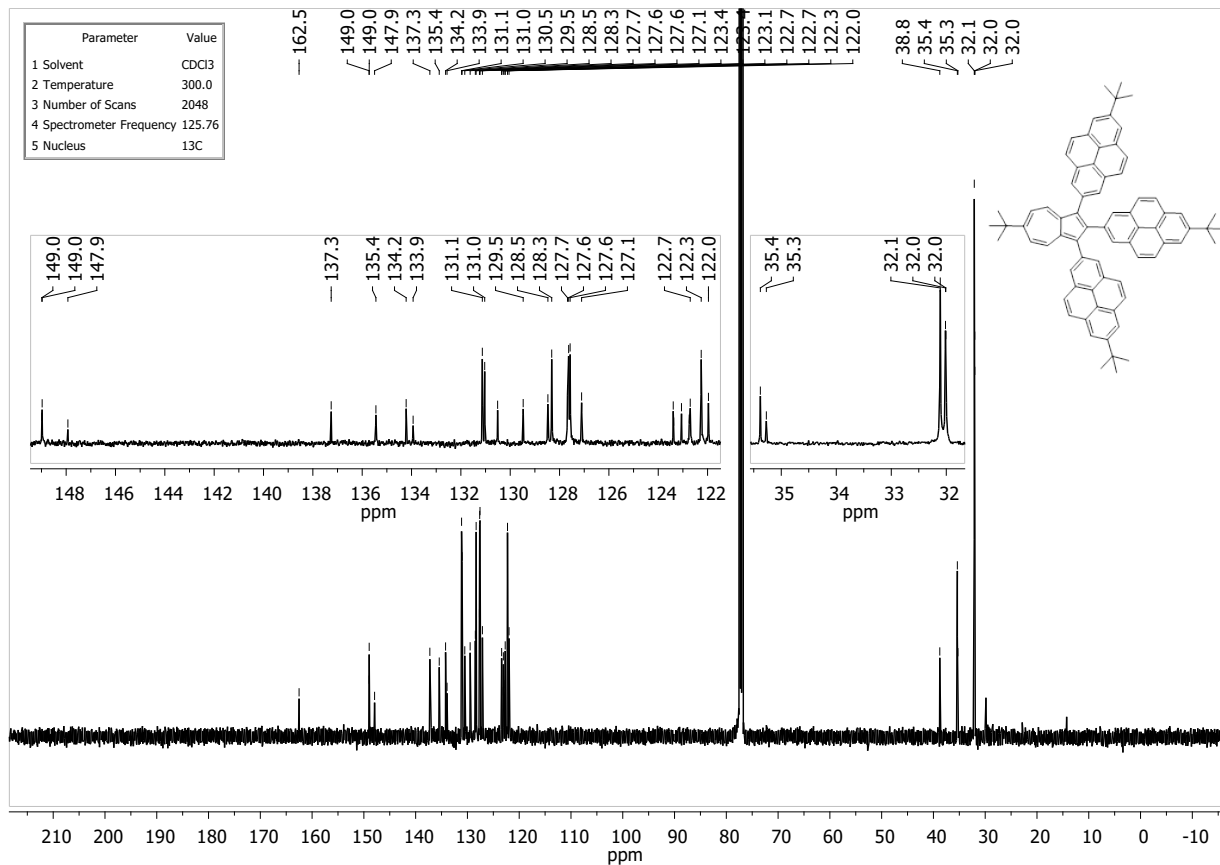

**Compound 3a, 3,6,11-tri-*tert*-butyl-13a-(4-(*tert*-butyl)phenyl)azuleno[1,2-*f*]phenanthren-14(13aH)-one**

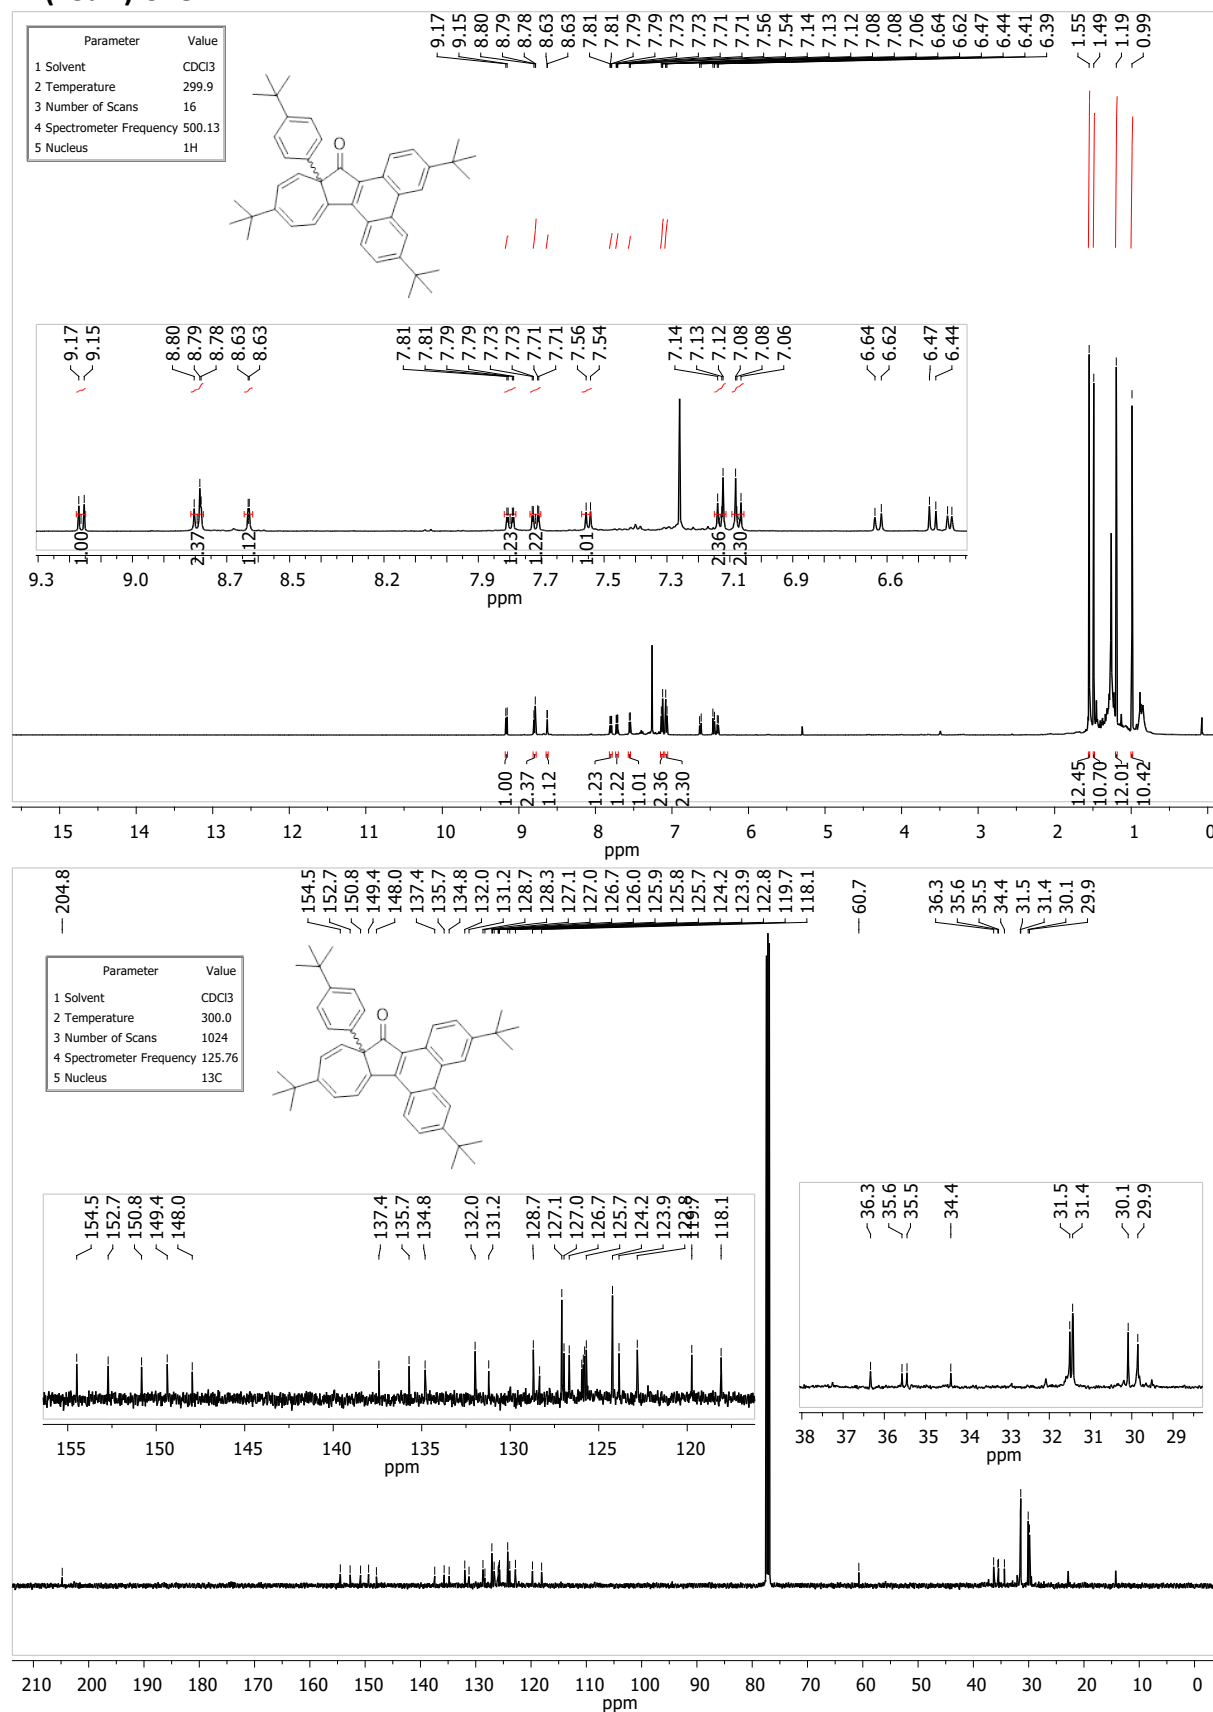

**Compound 3b, 3,11-di-*tert*-butyl-6-methoxy-13*a*-(4-methoxyphenyl)azuleno[1,2-*b*]phenanthren-14(13*a*H)-one**

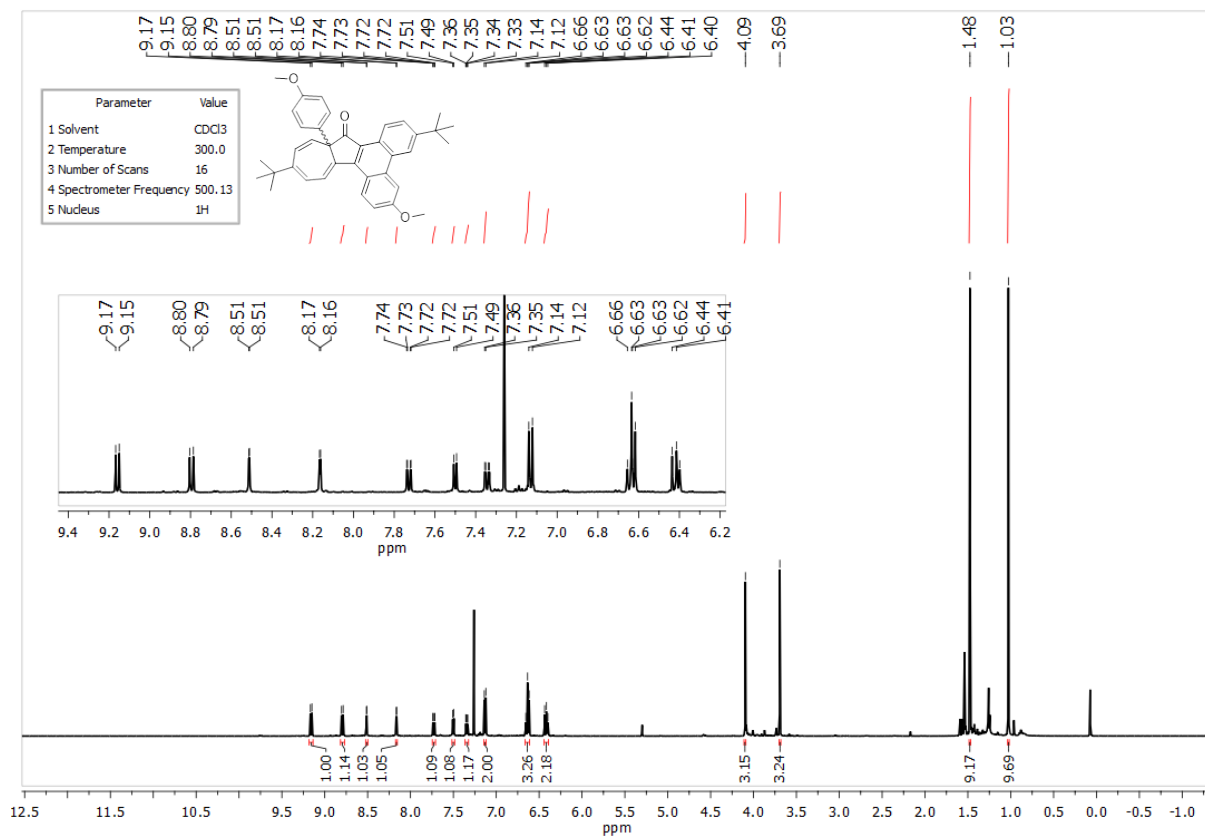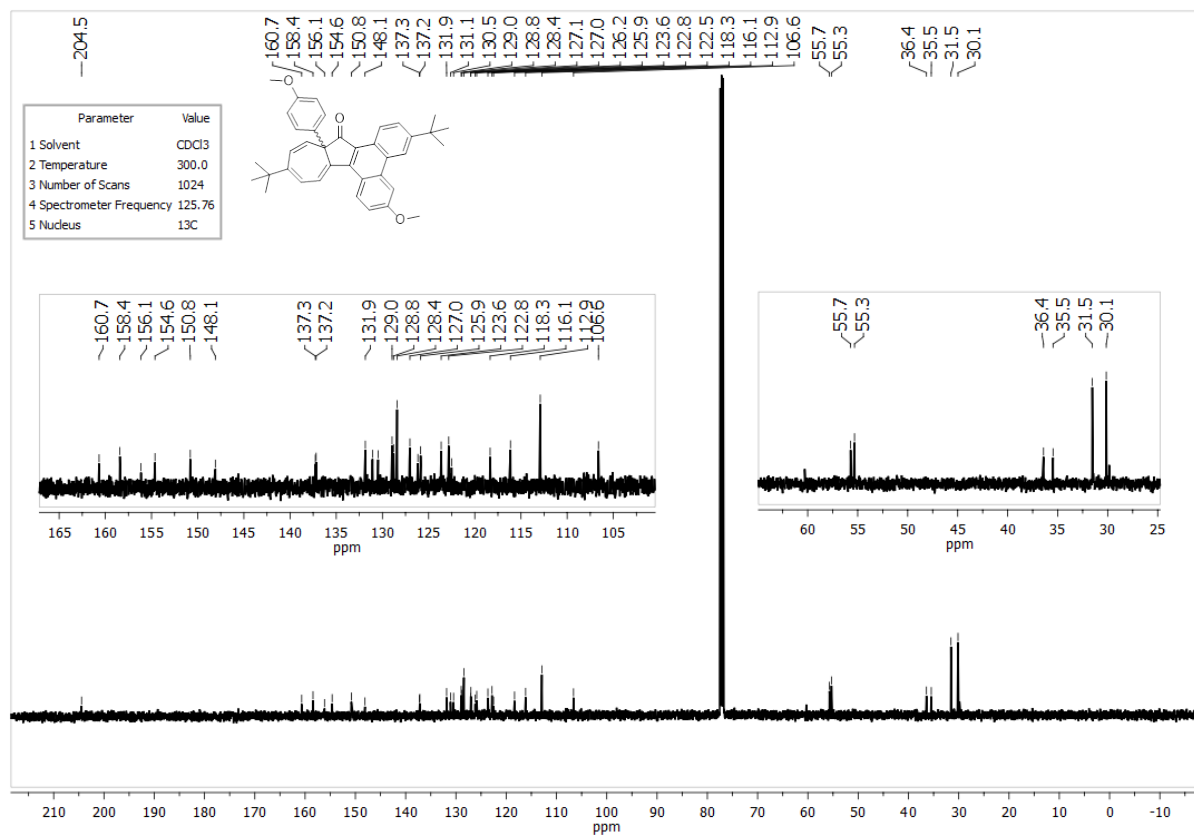

**Compound 3c, 11-(tert-butyl)-3,6-dimethoxy-13a-(4-methoxyphenyl)azuleno[1,2-*b*]phenanthren-14(13a*H*)-one**

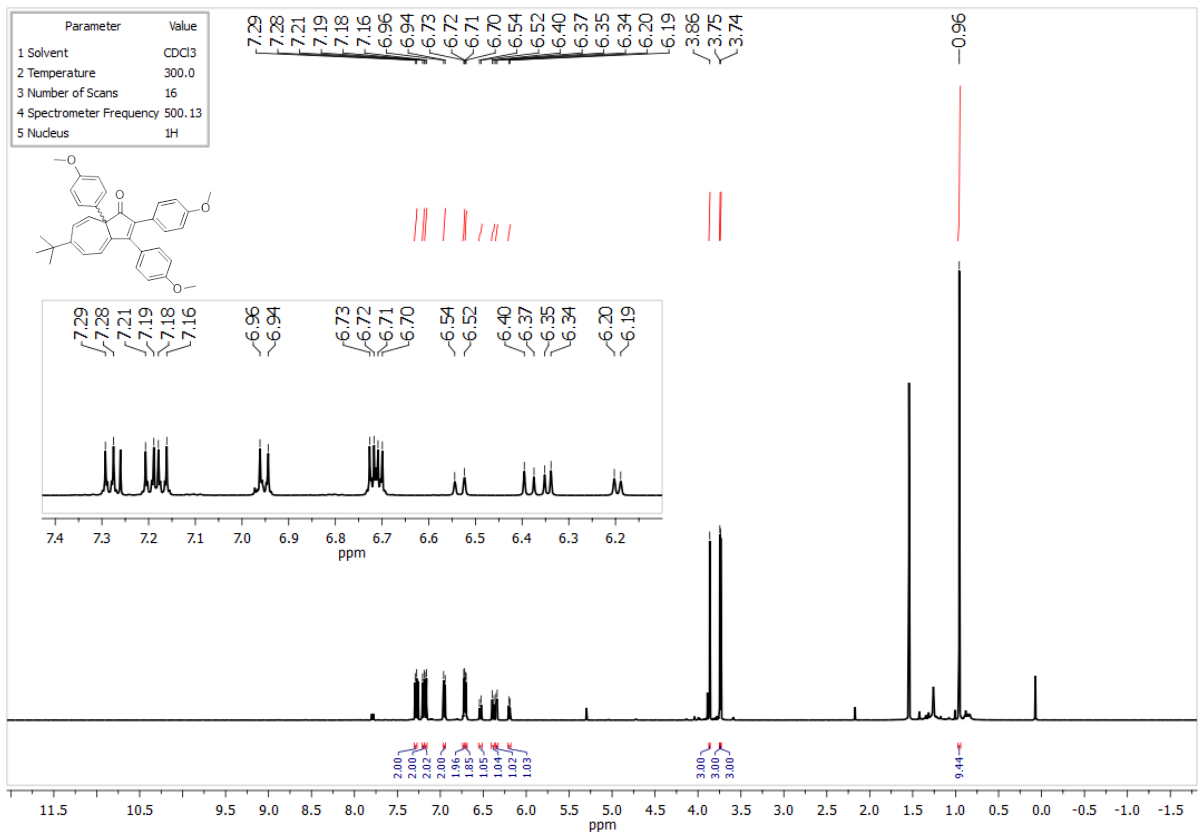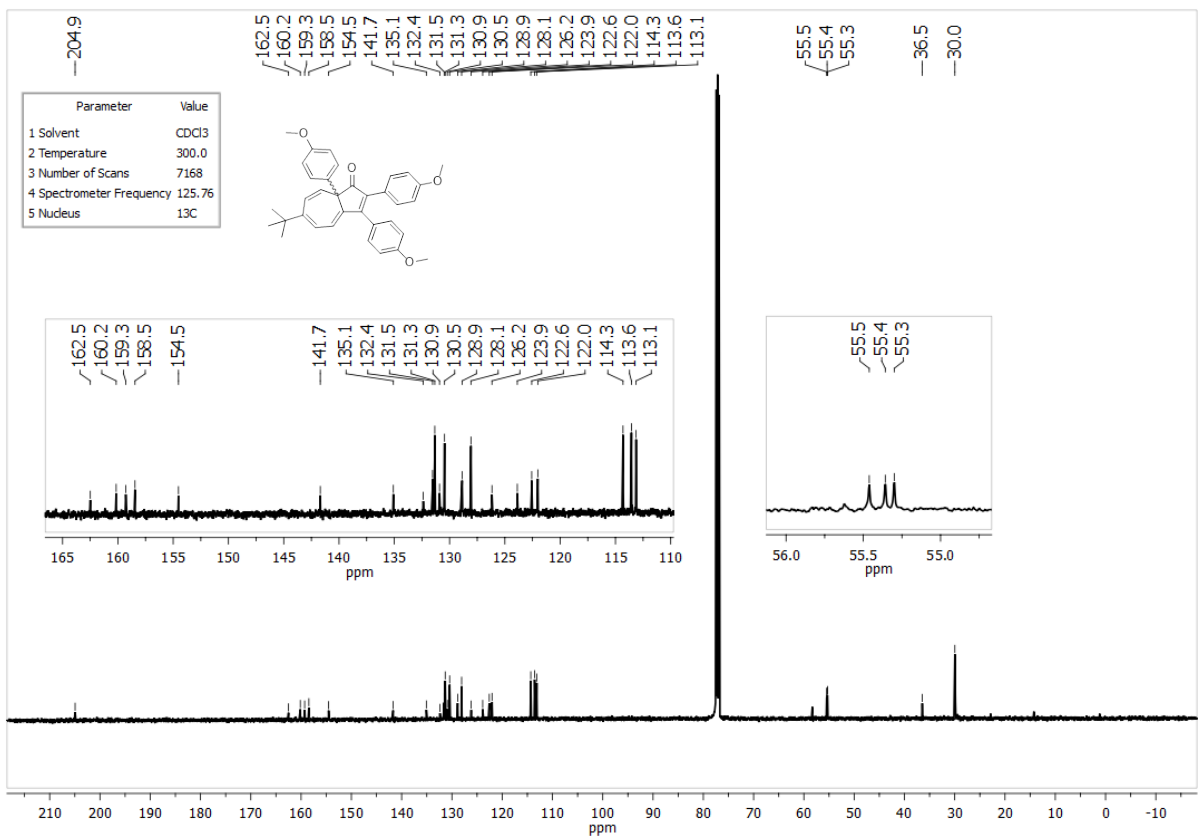



**Compound 4d, 4,9,14-tri-*tert*-butyl-17-(4-(*tert*-butyl)phenyl)azuleno[2,1-*k*]dibenzo[*m,pqr*]tetraphene**

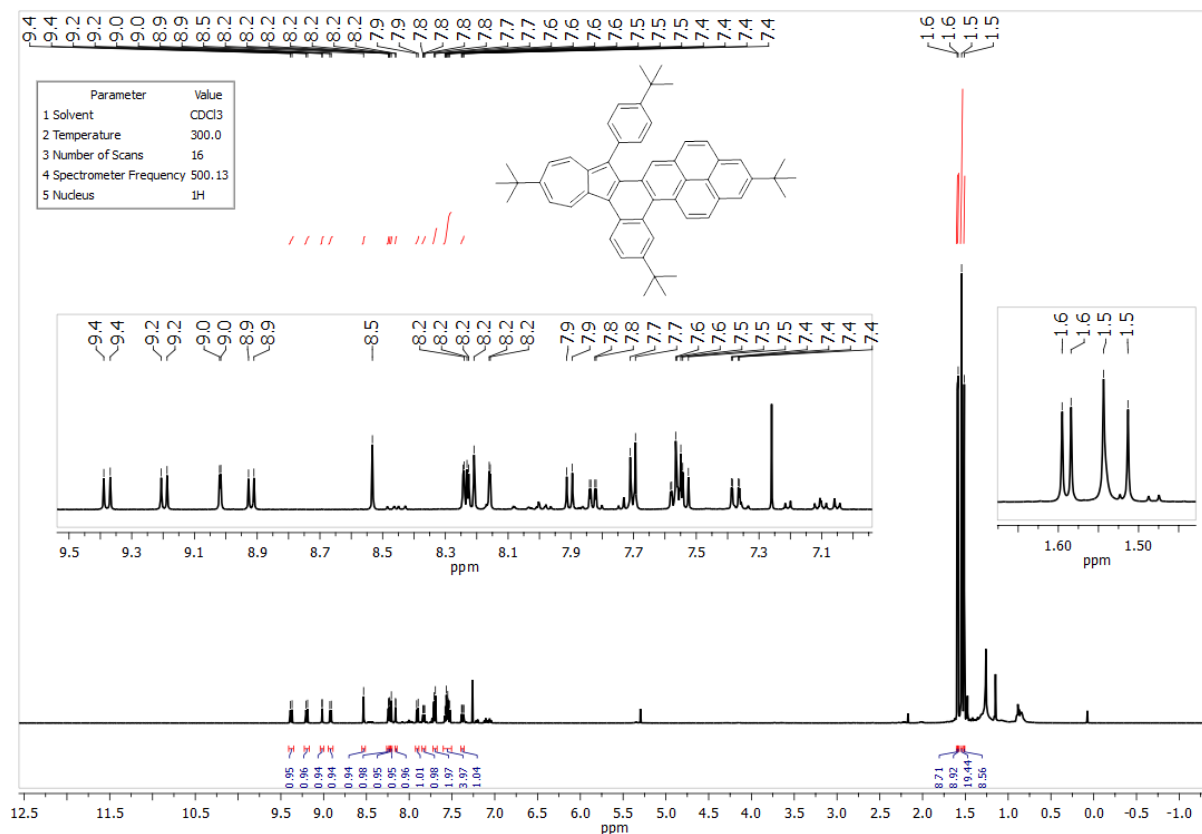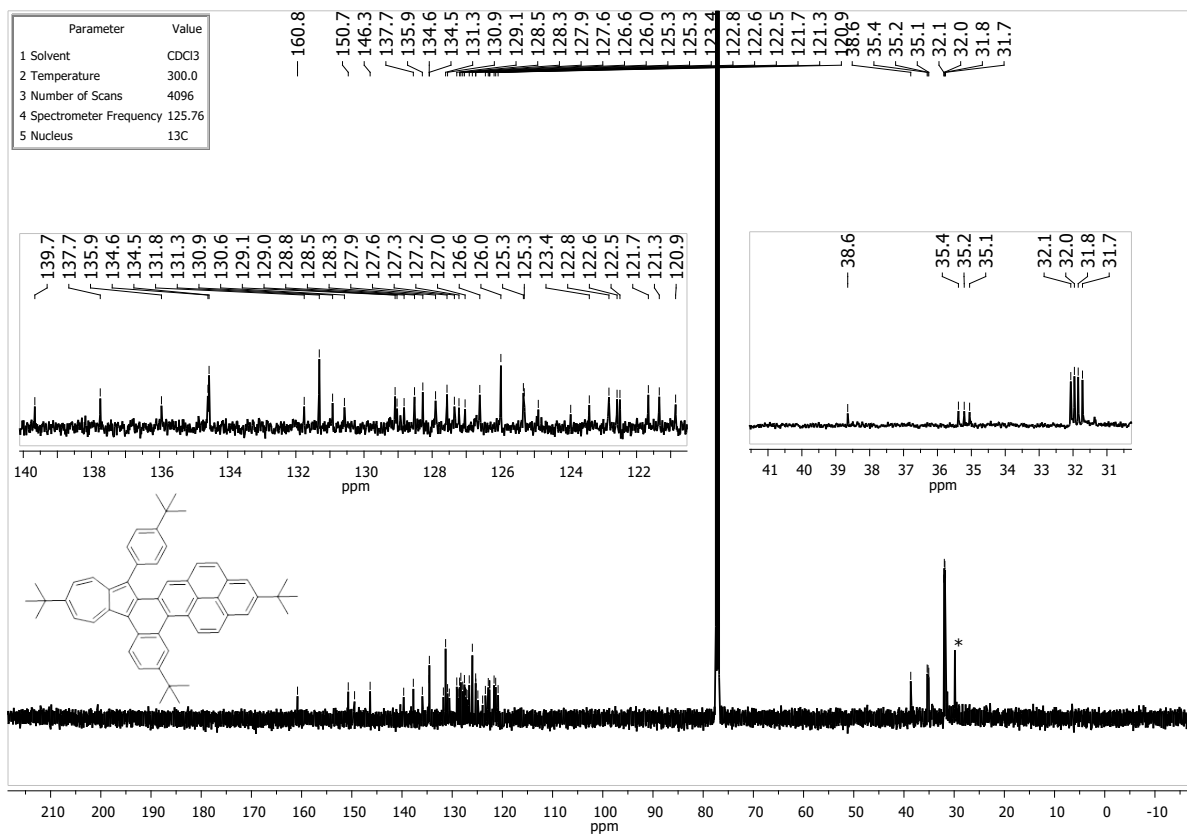

# Compound 2d, 2,7,12,17-tetra-*tert*-butylazuleno[1,2,3-*cd*]tribenzo[*a,f,lm*]perylene

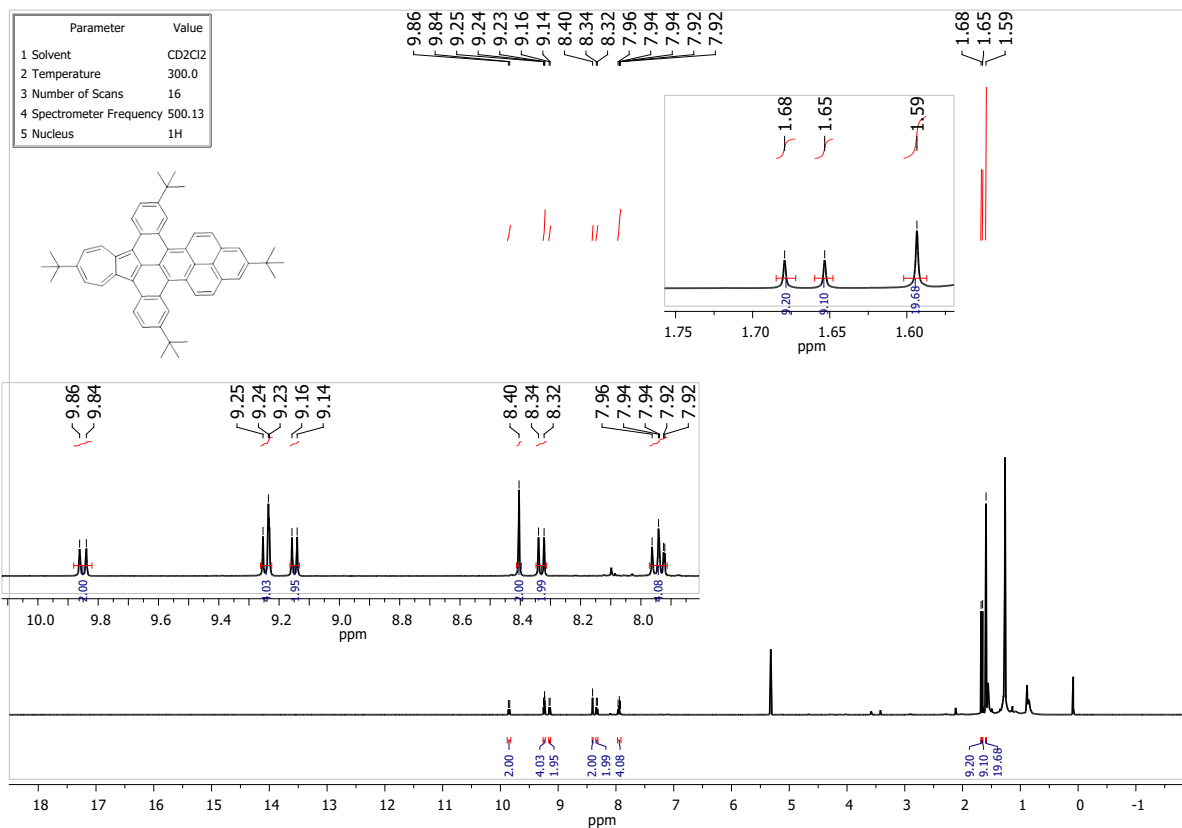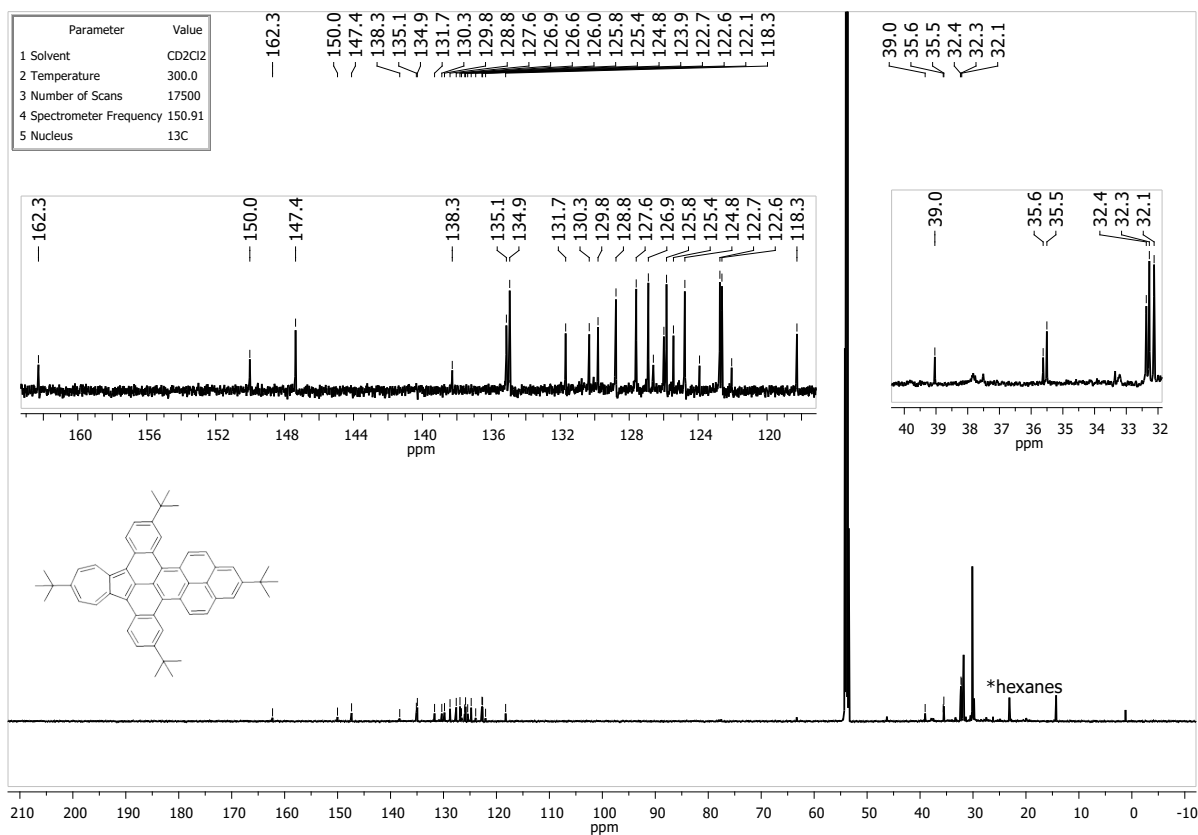

**Compound 4e, 2,7,13-tri-*tert*-butyl-10-(7-(*tert*-butyl)pyren-2-yl)azuleno[1,2-*k*]dibenzo[*m,pqr*]tetraphene**

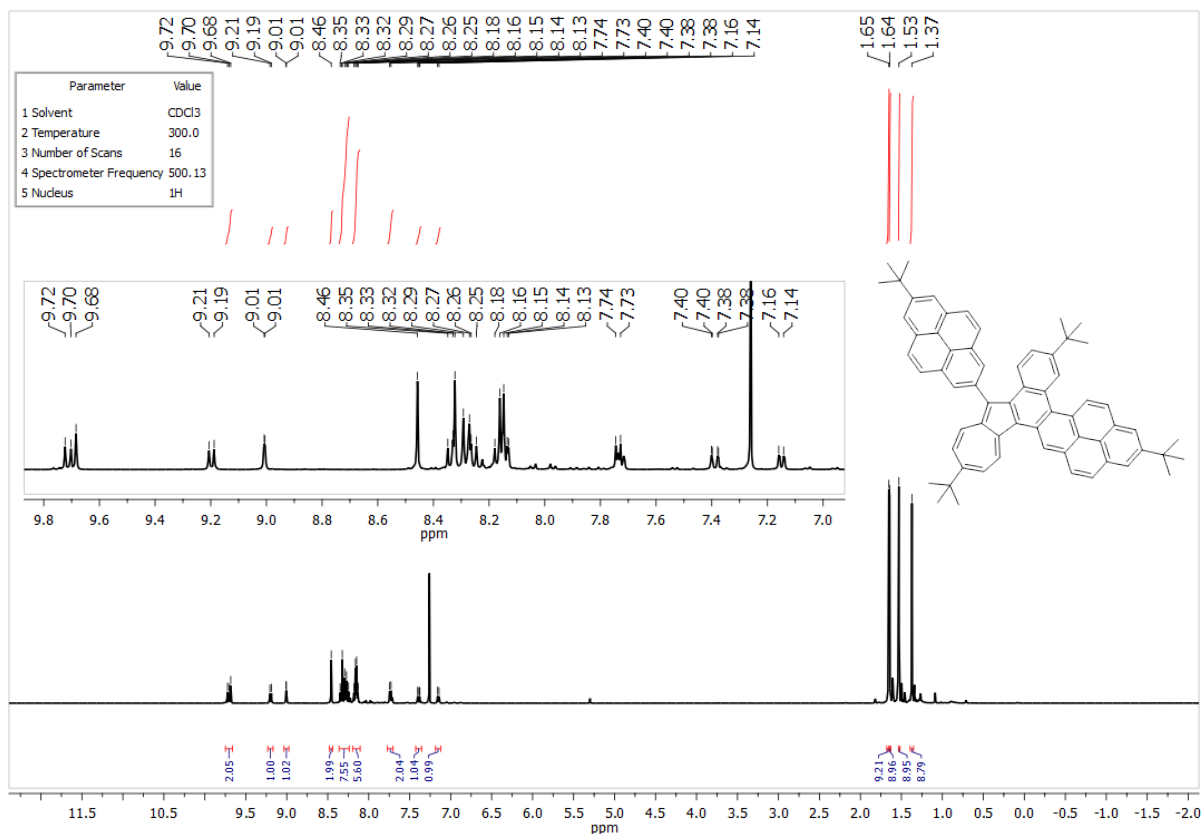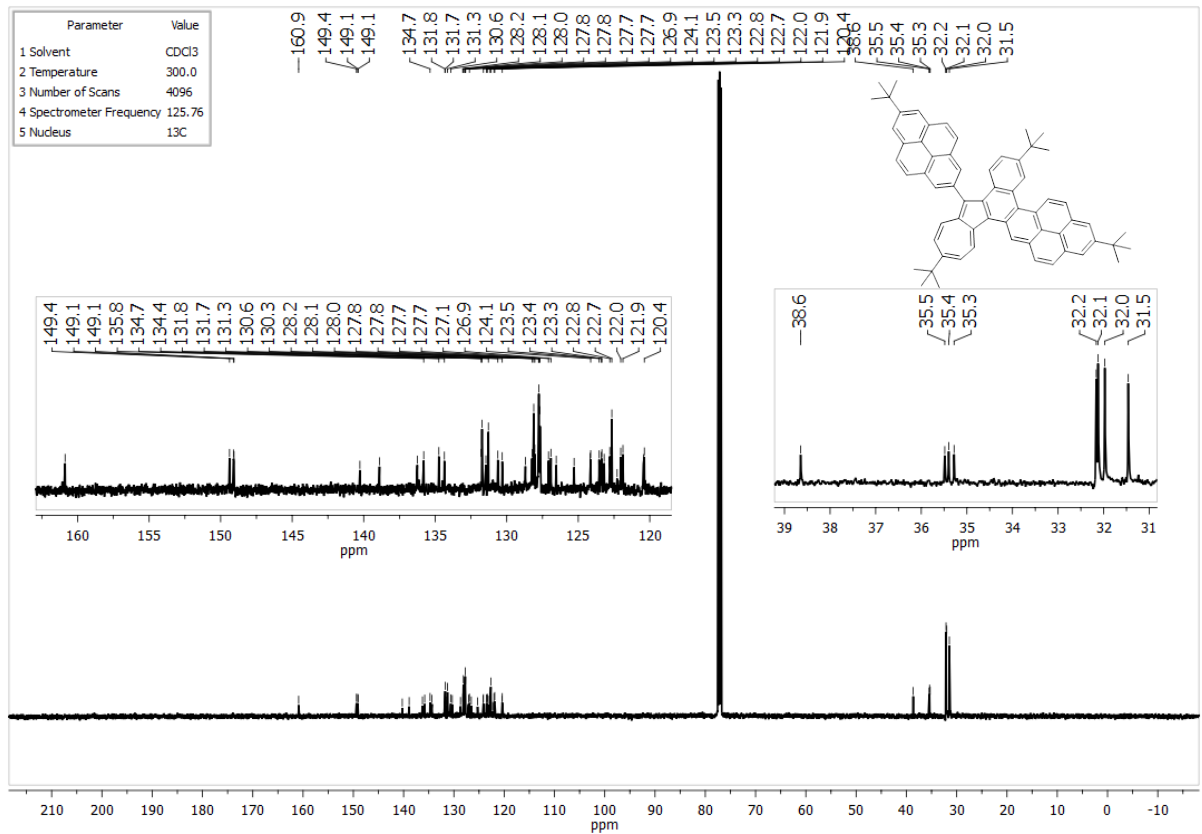

**Compound 2f, 2,9,16,23-tetra-*tert*-butylazuleno[1,2,3-*hi*]dinaphtho[8,1,2-*pqr*:2',1',8'-*zya*]pyreno[1,2,3-*uv*]hexacene**

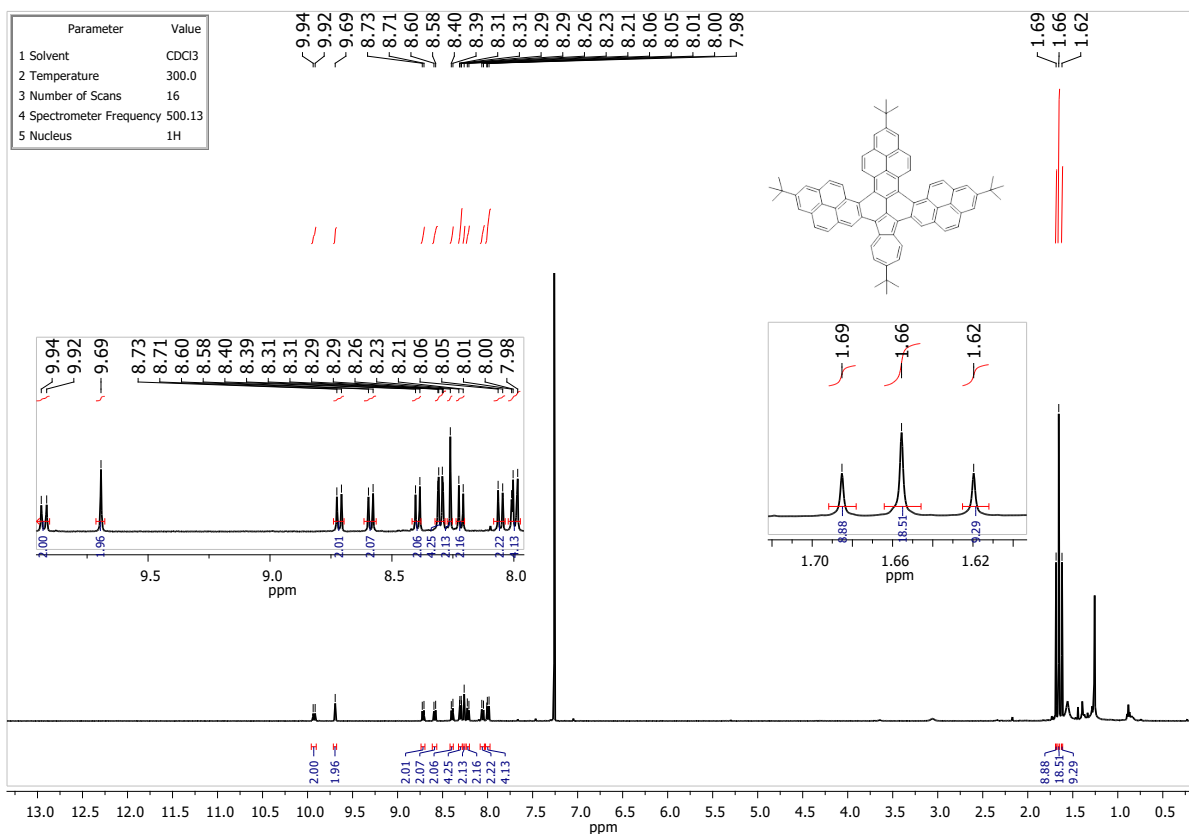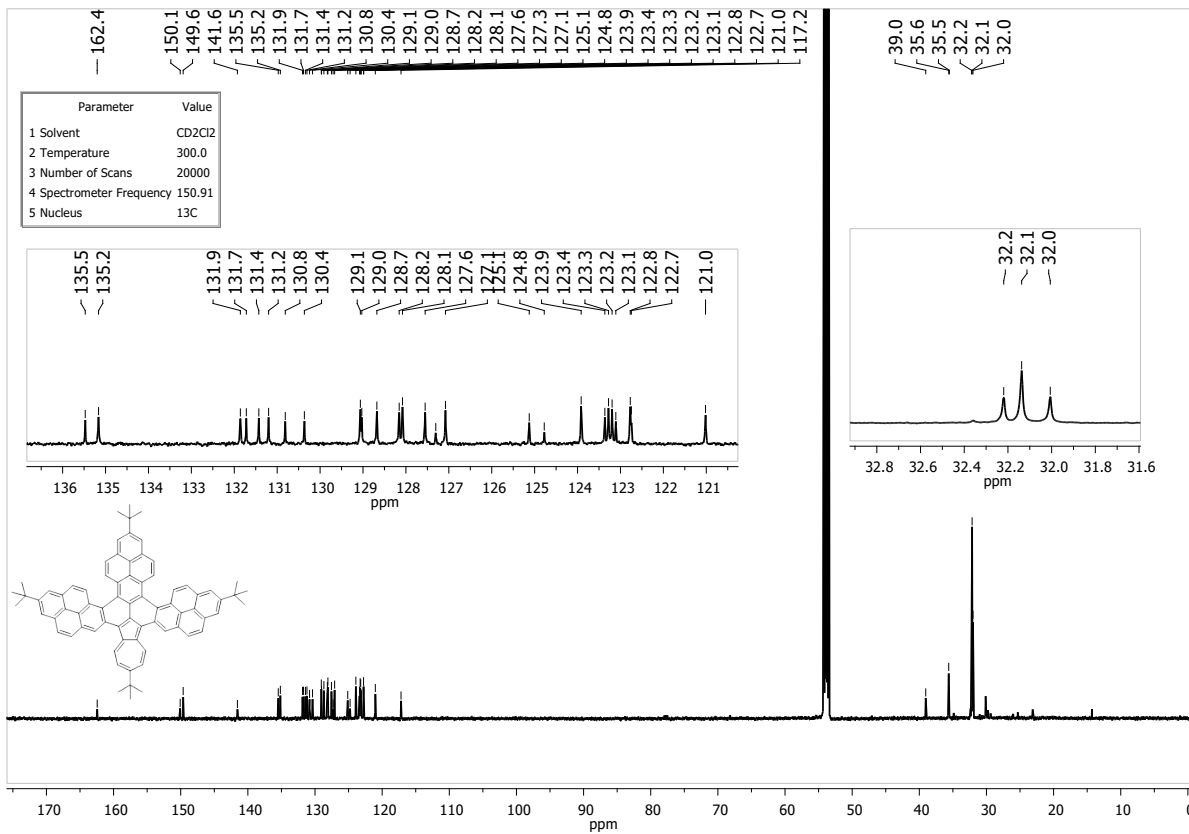

## Cartesian coordinates of DFT-optimized structures

### Compound 3a

Energy: -4681847.344 kJ/mol

|   |          |          |          |   |          |          |          |
|---|----------|----------|----------|---|----------|----------|----------|
| C | 0.86938  | -1.16403 | -0.46896 | H | 2.01187  | -0.39003 | -3.36540 |
| C | 1.68630  | -0.09963 | -1.18210 | H | -5.01775 | -0.84086 | 0.67919  |
| C | 0.61401  | 0.93592  | -1.60320 | H | -2.79681 | -4.46977 | 1.13381  |
| C | -0.66447 | 0.53062  | -0.99994 | H | -0.82208 | -3.38451 | 0.26427  |
| C | -0.53549 | -0.73623 | -0.44285 | H | -1.14378 | 3.00472  | -2.00874 |
| C | 1.47230  | -2.23743 | 0.12155  | H | -3.22988 | 4.27566  | -1.85173 |
| C | 2.83764  | -2.64733 | -0.04427 | H | -5.00849 | 1.00880  | 0.20195  |
| C | 3.66373  | -2.46156 | -1.12765 | H | 4.02163  | 1.17274  | -1.89611 |
| C | 3.21937  | -1.75989 | -2.31741 | H | 5.53246  | 2.50265  | -0.51749 |
| C | 2.30865  | -0.76271 | -2.38700 | H | 3.07841  | 1.70501  | 2.92472  |
| C | -1.71279 | -1.42481 | 0.04055  | H | 1.57753  | 0.37960  | 1.54324  |
| C | -1.89828 | 1.26421  | -0.99400 | H | 6.85292  | -3.05685 | 0.13221  |
| C | 2.68455  | 0.65763  | -0.28527 | H | 5.35497  | -2.85174 | 1.05260  |
| C | -2.94907 | -0.70962 | 0.11130  | H | 5.96894  | -1.51801 | 0.06437  |
| C | -4.08477 | -1.38270 | 0.62003  | H | 6.89817  | -3.20805 | -2.26764 |
| C | -4.06848 | -2.71228 | 1.02213  | H | 5.98131  | -1.71642 | -2.53075 |
| C | -2.85057 | -3.41577 | 0.87912  | H | 5.45714  | -3.23654 | -3.28354 |
| C | -1.71591 | -2.79260 | 0.40350  | H | 5.91744  | -5.13702 | -1.02297 |
| C | -2.00917 | 2.56649  | -1.52684 | H | 4.36613  | -5.06250 | -1.87988 |
| C | -3.19255 | 3.27685  | -1.43216 | H | 4.40833  | -4.97729 | -0.11100 |
| C | -4.32860 | 2.72870  | -0.79865 | H | -6.53374 | -5.16176 | 1.05025  |
| C | -4.21838 | 1.43660  | -0.28722 | H | -4.83516 | -5.35175 | 0.59279  |
| C | -3.03684 | 0.67120  | -0.37345 | H | -5.89064 | -4.29129 | -0.35611 |
| C | 3.80908  | 1.28475  | -0.83752 | H | -5.86275 | -4.48651 | 3.40760  |
| C | 4.66893  | 2.04189  | -0.04515 | H | -4.75299 | -3.12829 | 3.67729  |
| C | 4.44540  | 2.22034  | 1.33146  | H | -4.14732 | -4.65145 | 3.00487  |
| C | 3.30875  | 1.60260  | 1.86985  | H | -7.38632 | -3.07785 | 2.07338  |
| C | 2.44341  | 0.84214  | 1.07870  | H | -6.84106 | -2.14301 | 0.67645  |
| O | 0.83710  | 1.88567  | -2.34256 | H | -6.36438 | -1.65595 | 2.31743  |
| C | 5.06310  | -3.12890 | -1.11600 | H | -7.73820 | 3.24942  | -1.26995 |
| C | 5.85288  | -2.60684 | 0.10911  | H | -6.92382 | 1.71506  | -0.93104 |
| C | 5.88820  | -2.79733 | -2.37698 | H | -6.57173 | 2.58723  | -2.43190 |
| C | 4.92625  | -4.66717 | -1.02437 | H | -6.94821 | 4.20481  | 0.95344  |
| C | -5.30713 | -3.43519 | 1.57715  | H | -5.22189 | 4.22286  | 1.36446  |
| C | -5.65720 | -4.63152 | 0.65930  | H | -6.11382 | 2.69277  | 1.34115  |
| C | -4.99347 | -3.95639 | 3.00065  | H | -6.55080 | 5.40804  | -1.16455 |
| C | -6.54031 | -2.51647 | 1.66194  | H | -5.37243 | 4.85959  | -2.36294 |
| C | -5.65632 | 3.49839  | -0.65939 | H | -4.82255 | 5.52739  | -0.81200 |
| C | -6.78720 | 2.71142  | -1.36437 | H | 6.18033  | 5.11015  | 2.19480  |
| C | -6.00299 | 3.66027  | 0.84022  | H | 4.49360  | 4.97803  | 1.65823  |
| C | -5.58647 | 4.90303  | -1.28902 | H | 5.81114  | 4.51998  | 0.56703  |
| C | 5.42431  | 3.06013  | 2.17150  | H | 5.73346  | 3.74292  | 4.20739  |
| C | 5.47952  | 4.50129  | 1.61053  | H | 4.97820  | 2.14617  | 4.12009  |
| C | 5.00809  | 3.13708  | 3.65270  | H | 4.02407  | 3.60352  | 3.77630  |
| C | 6.83607  | 2.43057  | 2.09934  | H | 7.54736  | 3.02283  | 2.68800  |
| H | 0.90025  | -2.84362 | 0.81641  | H | 7.20982  | 2.38597  | 1.07096  |
| H | 3.20384  | -3.29543 | 0.74911  | H | 6.83060  | 1.41003  | 2.49966  |
| H | 3.65546  | -2.07913 | -3.26033 |   |          |          |          |

### Compound 3b

Energy: -4457175.222 kJ/mol

|   |          |          |          |   |          |          |          |
|---|----------|----------|----------|---|----------|----------|----------|
| C | -1.10195 | -1.00235 | 0.20012  | C | 3.73256  | -2.24874 | -0.74392 |
| C | -1.70041 | 0.22819  | 0.86171  | C | 3.41808  | -3.55355 | -1.10143 |
| C | -0.44925 | 1.04234  | 1.27549  | C | 2.08983  | -4.01343 | -0.97858 |
| C | 0.73061  | 0.36752  | 0.71986  | C | 1.10743  | -3.15068 | -0.55202 |
| C | 0.36148  | -0.86824 | 0.19828  | C | 2.45152  | 2.10341  | 1.22419  |
| C | -1.89906 | -1.95029 | -0.37508 | C | 3.75745  | 2.55312  | 1.14609  |
| C | -3.32084 | -2.07457 | -0.22548 | C | 4.77279  | 1.76256  | 0.56593  |
| C | -4.10759 | -1.69508 | 0.83652  | C | 4.41173  | 0.50351  | 0.08932  |
| C | -3.54874 | -1.05781 | 2.01399  | C | 3.09626  | -0.00026 | 0.16029  |
| C | -2.45913 | -0.25869 | 2.07236  | C | -3.51745 | 1.96995  | 0.41698  |
| C | 1.38153  | -1.79620 | -0.23069 | C | -4.20686 | 2.86399  | -0.40816 |
| C | 2.08816  | 0.83314  | 0.72727  | C | -3.88482 | 2.94061  | -1.76801 |
| C | -2.51511 | 1.13373  | -0.08091 | C | -2.86944 | 2.11871  | -2.27918 |
| C | 2.74137  | -1.35048 | -0.28752 | C | -2.19534 | 1.23584  | -1.44406 |

|   |          |          |          |   |          |          |          |
|---|----------|----------|----------|---|----------|----------|----------|
| O | -0.49140 | 2.04605  | 1.97658  | H | -1.41547 | 0.60855  | -1.86525 |
| C | -5.61109 | -2.07401 | 0.81745  | H | -7.33559 | -1.69313 | -0.46622 |
| C | -6.26759 | -1.44501 | -0.43581 | H | -5.81392 | -1.80901 | -1.36304 |
| C | -6.37072 | -1.54803 | 2.05323  | H | -6.17061 | -0.35347 | -0.42145 |
| C | -5.77875 | -3.61127 | 0.77097  | H | -7.44035 | -1.75545 | 1.93672  |
| O | 4.31193  | -4.47269 | -1.54897 | H | -6.25115 | -0.46564 | 2.17511  |
| C | 5.67957  | -4.08913 | -1.68322 | H | -6.04622 | -2.03494 | 2.97959  |
| C | 6.23367  | 2.23852  | 0.44858  | H | -6.84293 | -3.87722 | 0.76573  |
| C | 7.15813  | 1.26508  | 1.21849  | H | -5.31691 | -4.08261 | 1.64644  |
| C | 6.64874  | 2.26774  | -1.04203 | H | -5.32175 | -4.04485 | -0.12449 |
| C | 6.43647  | 3.65117  | 1.02962  | H | 6.19765  | -4.96910 | -2.06611 |
| O | -4.49162 | 3.77029  | -2.66789 | H | 6.10935  | -3.80443 | -0.71560 |
| C | -5.52259 | 4.63213  | -2.19738 | H | 5.79187  | -3.26059 | -2.39235 |
| H | -1.45061 | -2.67949 | -1.04202 | H | 8.20198  | 1.59208  | 1.13950  |
| H | -3.79813 | -2.66183 | -1.00708 | H | 7.09754  | 0.24549  | 0.82355  |
| H | -4.05201 | -1.25403 | 2.95709  | H | 6.89253  | 1.23027  | 2.28137  |
| H | -2.10739 | 0.07889  | 3.04532  | H | 7.68829  | 2.60354  | -1.13880 |
| H | 4.76214  | -1.92538 | -0.79342 | H | 6.01472  | 2.95657  | -1.61206 |
| H | 1.86909  | -5.05037 | -1.21026 | H | 6.57355  | 1.27911  | -1.50709 |
| H | 0.10809  | -3.53921 | -0.41662 | H | 7.48705  | 3.94320  | 0.92265  |
| H | 1.68249  | 2.72571  | 1.66527  | H | 6.18876  | 3.69401  | 2.09628  |
| H | 3.98848  | 3.53752  | 1.53684  | H | 5.83043  | 4.39941  | 0.50636  |
| H | 5.18427  | -0.10927 | -0.35928 | H | -5.85926 | 5.19846  | -3.06721 |
| H | -3.78047 | 1.92406  | 1.46896  | H | -5.14860 | 5.32596  | -1.43434 |
| H | -4.98315 | 3.48814  | 0.01952  | H | -6.36526 | 4.06247  | -1.78619 |
| H | -2.62371 | 2.18688  | -3.33483 |   |          |          |          |

## Compound 3c

Energy: -4348167.184 kJ/mol

|   |          |          |          |   |          |          |          |
|---|----------|----------|----------|---|----------|----------|----------|
| C | 0.56973  | -0.82746 | -0.38637 | C | -6.61581 | 4.32064  | -0.90061 |
| C | 1.21697  | 0.46467  | -0.83264 | O | 4.13616  | 3.20398  | 3.26358  |
| C | -0.01635 | 1.36655  | -1.09848 | C | 5.18398  | 4.11518  | 2.94888  |
| C | -1.23107 | 0.65121  | 0.65091  | H | 0.73046  | -2.77327 | 0.39791  |
| C | -0.87405 | -0.62678 | -0.27002 | H | 3.09699  | -2.96527 | 0.33211  |
| C | 1.27112  | -1.95201 | -0.06798 | H | 3.49322  | -0.70250 | -3.19454 |
| C | 2.67391  | -2.17027 | -0.27841 | H | 1.66860  | 0.76446  | -2.98907 |
| C | 3.49225  | -1.61215 | -1.23046 | H | -4.10770 | -2.16288 | 2.69243  |
| C | 2.99220  | -0.68241 | -2.23016 | H | -2.70674 | -4.92862 | -0.29448 |
| C | 1.96827  | 0.19167  | -2.11348 | H | -1.18360 | -3.18797 | -1.18427 |
| C | -1.78181 | -1.67646 | 0.24204  | H | -1.92335 | 3.21336  | -0.15588 |
| C | -2.56915 | 1.25194  | -0.77295 | H | -4.12236 | 4.26791  | -0.35848 |
| C | 2.05822  | 1.15960  | 0.25511  | H | -5.78906 | 0.53237  | -1.69693 |
| C | -2.62787 | -1.41928 | 1.33074  | H | 3.32834  | 2.19847  | -1.13669 |
| C | -3.47811 | -2.39901 | 1.84266  | H | 4.58852  | 3.42799  | 0.56393  |
| C | -3.50638 | -3.67041 | 1.25250  | H | 2.23814  | 1.56348  | 3.64795  |
| C | -2.67067 | -3.94228 | 0.15762  | H | 0.96978  | 0.32535  | 1.92528  |
| C | -1.81702 | -2.96247 | -0.33170 | H | 6.69525  | -2.20270 | 0.00285  |
| C | -2.76447 | 2.61242  | -0.48296 | H | 5.16008  | -2.43158 | 0.85223  |
| C | -4.01669 | 3.21708  | -0.60198 | H | 5.63813  | -0.81212 | 0.32160  |
| C | -5.11344 | 2.46202  | -1.03534 | H | 6.82910  | -1.63411 | -2.32060 |
| C | -4.93467 | 1.10395  | -1.34696 | H | 5.73531  | -0.24525 | -2.21926 |
| C | -3.68667 | 0.51372  | -1.21658 | H | 5.43931  | -1.53709 | -3.40054 |
| C | 3.07767  | 2.05034  | -0.09111 | H | 6.04672  | -3.94552 | -1.75177 |
| C | 3.80005  | 2.75352  | 0.87766  | H | 4.52163  | -3.79018 | -2.64411 |
| C | 3.49671  | 2.57627  | 2.23236  | H | 4.50408  | -4.21611 | -0.92470 |
| C | 2.46734  | 1.69476  | 2.59452  | H | -5.70914 | -5.41956 | 2.91254  |
| C | 1.75925  | 1.00456  | 1.61791  | H | -5.89812 | -3.68153 | 2.55003  |
| O | 0.04358  | 2.46544  | -1.63209 | H | -4.61906 | -4.22973 | 3.67623  |
| C | 4.96238  | -2.09837 | -1.32028 | H | -7.67656 | 4.48695  | -1.09391 |
| C | 5.65005  | -1.87338 | 0.04840  | H | -6.02024 | 4.97524  | -1.54831 |
| C | 5.77852  | -1.32837 | -2.37991 | H | -6.39631 | 4.55101  | 0.14899  |
| C | 5.00724  | -3.60266 | -1.67925 | H | 5.54561  | 4.49678  | 3.90506  |
| O | -4.29980 | -4.69749 | 1.66262  | H | 4.81943  | 4.95063  | 2.33843  |
| C | -5.17688 | -4.47885 | 2.76560  | H | 6.00649  | 3.61482  | 2.42280  |
| O | -6.37803 | 2.94595  | -1.19165 | H | -2.61685 | -0.43741 | 1.79427  |
| H | -3.57002 | -0.53330 | -1.47540 |   |          |          |          |

## Compound 2d

Energy: -5488784.837 kJ/mol

|   |          |          |          |   |           |          |          |
|---|----------|----------|----------|---|-----------|----------|----------|
| C | 2.51166  | -3.58953 | 0.67258  | C | -2.59457  | 2.43504  | -0.45061 |
| C | 0.20689  | 0.00148  | 0.23855  | C | -3.92511  | 2.41478  | -0.73640 |
| C | -0.17850 | -5.92802 | 2.15623  | C | -4.65806  | 1.18564  | -0.76590 |
| C | 1.90074  | -4.72194 | 1.19555  | C | -6.02543  | -1.24322 | -0.99950 |
| C | 0.52663  | -4.73591 | 1.48216  | C | -6.03306  | 1.14830  | -1.03930 |
| C | -0.22688 | 3.62185  | 1.02077  | C | -6.74636  | -0.05444 | -1.14969 |
| C | 2.39207  | 1.17218  | -0.06520 | C | -8.25798  | -0.02575 | -1.44235 |
| C | 0.49195  | 4.78484  | 1.29025  | C | -8.50865  | 0.69222  | -2.79002 |
| C | -0.19932 | -3.58458 | 1.16130  | C | -8.86577  | -1.43848 | -1.53060 |
| C | 1.86975  | 4.76659  | 0.99741  | C | -8.98330  | 0.74173  | -0.31118 |
| C | -0.45570 | -1.25459 | 0.23522  | C | -2.03650  | -3.41393 | -0.40103 |
| C | 1.78679  | -2.42690 | 0.35216  | H | -4.41444  | -3.41096 | -0.86951 |
| C | 0.36379  | -2.44611 | 0.55116  | H | -6.52137  | -2.20240 | -1.10319 |
| C | 3.69564  | 0.74554  | -0.45543 | H | -6.54453  | 2.09737  | -1.17690 |
| C | 3.69916  | -0.75156 | -0.42465 | H | -4.44295  | 3.33770  | -0.98578 |
| C | 0.34702  | 2.45933  | 0.45558  | H | -2.06583  | 3.37552  | -0.52008 |
| C | -0.46484 | 1.25272  | 0.18907  | H | -9.93999  | -1.36313 | -1.73301 |
| C | 8.14744  | -0.06182 | -1.96627 | H | -8.74340  | -1.99468 | -0.59425 |
| C | 6.04483  | -1.25202 | -1.26872 | H | -8.41758  | -2.02622 | -2.33975 |
| C | -2.53524 | -0.01737 | -0.24944 | H | -8.01231  | 0.16501  | -3.61297 |
| C | 1.62600  | 0.00414  | 0.12144  | H | -9.58320  | 0.72591  | -3.00688 |
| C | 1.76725  | 2.43929  | 0.25565  | H | -8.13849  | 1.72272  | -2.77921 |
| C | -1.84342 | -1.26750 | -0.07913 | H | -8.62491  | 1.77270  | 0.22283  |
| C | -1.85395 | 1.24287  | -0.12355 | H | -10.06142 | 0.77829  | -0.50906 |
| C | 2.40394  | -1.16825 | -0.02008 | H | -8.83197  | 0.24897  | 0.65622  |
| C | 4.75991  | -1.56680 | -0.82763 | C | -1.65111  | 5.86448  | 2.18655  |
| C | 6.04275  | 1.23156  | -1.31875 | C | 0.02792   | 7.23094  | 0.93375  |
| C | 6.67353  | -0.00824 | -1.48412 | C | 0.55407   | 6.37335  | 3.24807  |
| C | 2.48785  | 3.62247  | 0.52333  | H | 0.44061   | 5.55047  | 3.96329  |
| C | -0.14648 | 6.04142  | 1.90850  | H | 1.62528   | 6.55704  | 3.11433  |
| C | 4.74533  | 1.54883  | -0.88957 | H | -2.21519  | 5.65425  | 1.27065  |
| C | 8.21975  | -0.80583 | -3.32344 | H | -2.05490  | 6.78716  | 2.61823  |
| H | 7.85437  | -1.83501 | -3.25517 | H | -1.84270  | 5.05518  | 2.90033  |
| H | 9.25877  | -0.84465 | -3.67101 | C | 0.77985   | -7.11045 | 2.39578  |
| H | 7.62653  | -0.28699 | -4.08509 | C | -1.33675  | -6.42432 | 1.25828  |
| C | 8.77976  | 1.33011  | -2.16473 | C | -0.74854  | -5.48378 | 3.52468  |
| H | 8.26764  | 1.91140  | -2.93944 | H | -0.96338  | -6.74917 | 0.28011  |
| H | 9.82042  | 1.20724  | -2.48346 | H | -2.08682  | -5.64411 | 1.09052  |
| H | 8.78664  | 1.91622  | -1.23907 | H | -1.84363  | -7.27594 | 1.72821  |
| C | 9.00095  | -0.81465 | -0.91475 | H | 0.05211   | -5.13788 | 4.18858  |
| H | 8.97336  | -0.29931 | 0.05219  | H | -1.25801  | -6.32275 | 4.01435  |
| H | 10.04502 | -0.85827 | -1.24610 | H | -1.47328  | -4.66946 | 3.41975  |
| H | 8.65952  | -1.84236 | -0.75830 | H | 1.20975   | -7.48297 | 1.45885  |
| H | 6.64742  | -2.12671 | -1.49280 | H | 0.23265   | -7.93780 | 2.86131  |
| H | 4.55406  | -2.63268 | -0.81697 | H | 1.60304   | -6.84034 | 3.06684  |
| H | 6.63065  | 2.10549  | -1.57034 | H | 2.52148   | -5.58015 | 1.42738  |
| H | 4.53160  | 2.61268  | -0.92163 | H | -1.26821  | 3.58147  | 1.30550  |
| H | 3.59071  | -3.59077 | 0.57530  | H | -1.24377  | -3.54479 | 1.44304  |
| H | 3.56631  | 3.62672  | 0.42067  | H | 2.48130   | 5.64275  | 1.19360  |
| C | -2.57330 | -2.47610 | -0.36414 | H | -0.47327  | 7.03197  | -0.02067 |
| C | -3.93527 | -0.02946 | -0.56855 | H | 1.08335   | 7.43375  | 0.72300  |
| C | -3.90406 | -2.47587 | -0.65205 | H | -0.40755  | 8.14134  | 1.36339  |
| C | -4.64616 | -1.25490 | -0.72407 | H | 0.11449   | 7.27409  | 3.69356  |

## Compound 4d

Energy: -5491837.596 kJ/mol

|   |          |          |          |   |          |          |          |
|---|----------|----------|----------|---|----------|----------|----------|
| C | -2.59742 | 3.13779  | -0.67734 | C | -3.62827 | 0.06369  | -0.21082 |
| C | 0.05841  | -0.04048 | 0.22351  | C | 0.30219  | -2.51983 | 0.31742  |
| C | -2.30919 | 6.53456  | 1.15976  | C | 0.89762  | -1.19546 | 0.09475  |
| C | -2.57633 | 4.51403  | -0.43186 | C | -7.93570 | -1.45216 | -1.49719 |
| C | -2.34669 | 5.02687  | 0.85168  | C | -6.11828 | 0.09491  | -0.69389 |
| C | 1.07575  | -3.61429 | 0.77387  | C | 2.85194  | 0.30604  | -0.11492 |
| C | -1.92790 | -1.51986 | -0.03347 | C | -1.38555 | -0.22138 | 0.16204  |
| C | 0.54548  | -4.87612 | 1.02808  | C | -1.11015 | -2.68886 | 0.20485  |
| C | -2.14471 | 4.09133  | 1.88362  | C | 2.02238  | 1.42528  | 0.20243  |
| C | -0.84371 | -5.03302 | 0.84651  | C | 2.28173  | -0.99941 | -0.21797 |
| C | 0.64610  | 1.23392  | 0.30215  | C | -2.44288 | 0.74769  | 0.10279  |
| C | -2.38788 | 2.21059  | 0.35253  | C | -4.90008 | 0.64907  | -0.33458 |
| C | -2.16830 | 2.72035  | -0.64521 | C | -5.54563 | -2.27835 | -1.17664 |
| C | -3.31491 | -1.37875 | -0.34652 | C | -6.45301 | -1.22181 | -1.10356 |

|   |          |          |          |   |          |          |          |
|---|----------|----------|----------|---|----------|----------|----------|
| C | -1.64519 | -3.96791 | 0.47613  | H | 2.71176  | -3.00415 | -0.96609 |
| C | 1.39471  | -6.05950 | 1.52492  | H | 10.09309 | 2.63374  | -0.92218 |
| C | -4.18095 | -2.34731 | -0.82858 | H | 8.82005  | 2.87795  | 0.28043  |
| C | -8.30764 | -0.51884 | -2.67679 | H | 8.52170  | 3.26793  | -1.42630 |
| H | -8.18706 | 0.53939  | -2.42613 | H | 8.36388  | 1.38733  | -3.16704 |
| H | -9.35521 | -0.67602 | -2.95934 | H | 9.97350  | 0.85964  | -2.63767 |
| H | -7.68460 | -0.73079 | -3.55328 | H | 8.63517  | -0.29758 | -2.69277 |
| C | -8.23771 | -2.89830 | -1.93728 | H | 9.08054  | -0.87018 | -0.19298 |
| H | -7.66617 | -3.18813 | -2.82596 | H | 10.41136 | 0.29713  | -0.19557 |
| H | -9.30021 | -2.98024 | -2.19059 | H | 9.11383  | 0.43146  | 1.00775  |
| H | -8.03301 | -3.62345 | -1.14191 | C | 2.88282  | -5.69416 | 1.68126  |
| C | -8.84209 | -1.13758 | -0.28025 | C | 1.28705  | -7.22280 | 0.50981  |
| H | -8.60419 | -1.79515 | 0.56373  | C | 0.86875  | -6.53441 | 2.90088  |
| H | -9.89296 | -1.29710 | -0.54882 | H | 0.93809  | -5.73197 | 3.64443  |
| H | -8.74095 | -0.10266 | 0.06034  | H | -0.17683 | -6.85585 | 2.84968  |
| H | -6.93946 | 0.80487  | -0.68413 | H | 3.32607  | -5.36842 | 0.73331  |
| H | -4.93096 | 1.71427  | -0.11375 | H | 3.44196  | -6.57228 | 2.02341  |
| H | -5.93409 | -3.22085 | -1.54235 | H | 3.03325  | -4.89910 | 2.42042  |
| H | -3.74478 | -3.32721 | -0.99679 | C | -2.55771 | 7.39488  | -0.09368 |
| H | -2.76906 | 2.77904  | -1.68887 | C | -0.92097 | 6.90679  | 1.73350  |
| H | -2.71808 | -4.11354 | 0.46313  | C | -3.40045 | 6.87521  | 2.20281  |
| C | 2.62335  | 2.72478  | 0.34889  | H | -0.12667 | 6.68551  | 1.01102  |
| C | 4.24623  | 0.51658  | -0.34179 | H | -0.70025 | 6.35737  | 2.65468  |
| C | 3.96133  | 2.90811  | 0.18008  | H | -0.88045 | 7.97802  | 1.96543  |
| C | 4.82136  | 1.81180  | -0.18129 | H | -4.39816 | 6.63091  | 1.81997  |
| C | 3.14229  | -2.04079 | -0.72427 | H | -3.37959 | 7.94635  | 2.43761  |
| C | 4.46824  | -1.83568 | -0.97116 | H | -3.25594 | 6.32605  | 3.13916  |
| C | 5.08556  | -0.56169 | -0.74484 | H | -1.79703 | 7.22365  | -0.86386 |
| C | 6.19967  | 1.98521  | -0.38849 | H | -2.52184 | 8.45622  | 0.17643  |
| C | 6.45517  | -0.33376 | -0.94986 | H | -3.54167 | 7.19878  | -0.53474 |
| C | 7.03844  | 0.92859  | -0.76956 | H | -2.73966 | 5.18553  | -1.26764 |
| C | 8.55102  | 1.11119  | -0.99973 | H | 2.12141  | -3.44024 | 0.98238  |
| C | 8.89760  | 0.74006  | -2.46152 | H | -1.96996 | 4.43592  | 2.89927  |
| C | 9.01352  | 2.55936  | -0.75018 | H | -1.31589 | -5.98975 | 1.05121  |
| C | 9.33192  | 0.18419  | -0.03768 | H | 1.66776  | -6.92162 | -0.47308 |
| H | 1.97798  | 3.56286  | 0.60033  | H | 0.25194  | -7.55688 | 0.38135  |
| H | 4.40273  | 3.89438  | 0.30110  | H | 1.87490  | -8.08268 | 0.85345  |
| H | 6.60644  | 2.98089  | -0.24775 | H | 1.46132  | -7.38410 | 3.26141  |
| H | 7.06798  | -1.17569 | -1.26130 | H | 0.01685  | 2.10268  | 0.43942  |
| H | 5.07520  | -2.64388 | -1.37217 |   |          |          |          |
| H | -2.01197 | 2.02930  | 2.46966  |   |          |          |          |

## Compound 4e

Energy: -6497620.397 kJ/mol

|   |          |          |          |   |          |          |          |
|---|----------|----------|----------|---|----------|----------|----------|
| C | -3.69843 | 1.26140  | 0.94037  | H | -8.06383 | -2.75967 | -2.63085 |
| H | -3.57005 | 1.90851  | 1.62392  | C | 0.76525  | -3.26884 | 2.02965  |
| C | 0.19491  | -0.74607 | 0.85399  | C | -0.02916 | 0.65123  | 0.53359  |
| C | -6.47066 | -0.73871 | -0.58652 | C | 2.42415  | 1.03735  | 0.39493  |
| C | -4.98394 | 0.73717  | 0.71914  | C | -0.55879 | -2.83212 | 1.85926  |
| C | -5.17790 | -0.19300 | -0.33406 | H | -1.27612 | -3.39454 | 2.12712  |
| C | 3.89406  | -0.89398 | -0.01562 | C | 1.77648  | -2.45879 | 1.52546  |
| C | 1.06641  | 1.53458  | 0.52966  | H | 2.67578  | -2.75247 | 1.61229  |
| C | 4.98353  | -0.00621 | -0.23392 | C | -1.24729 | 1.39224  | 0.38508  |
| C | -4.07209 | -0.60791 | -1.12356 | C | -9.00655 | -1.91559 | -1.03684 |
| C | 4.78485  | 1.40175  | -0.13411 | C | 7.37930  | 0.39228  | -0.72220 |
| C | -0.83122 | -1.59567 | 1.30713  | C | -1.78499 | 3.80343  | -0.00498 |
| H | -1.73464 | -1.31155 | 1.23145  | H | -2.66556 | 3.53671  | -0.24174 |
| C | -2.60587 | 0.84786  | 0.17327  | C | 8.86374  | -1.49488 | -1.22243 |
| C | -2.80382 | -0.09862 | -0.83712 | C | 0.74466  | 5.37087  | 0.86886  |
| H | -2.05762 | -0.40245 | -1.34059 | H | 1.34028  | 5.99479  | 1.26683  |
| C | 0.54752  | 2.87144  | 0.52701  | C | -0.42874 | 5.91736  | 0.38295  |
| C | -0.91502 | 2.74792  | 0.33455  | C | -7.56595 | -0.40379 | 0.24657  |
| C | 2.63415  | -0.37273 | 0.42060  | C | 3.50893  | 1.88846  | 0.11219  |
| C | 1.53402  | -1.22539 | 0.89297  | H | 3.36280  | 2.82681  | 0.08931  |
| C | 8.63960  | -0.12905 | -1.01451 | C | -5.53822 | -1.99804 | -2.48039 |
| H | 9.37635  | 0.46772  | -1.07488 | H | -5.66342 | -2.57657 | -3.22352 |
| C | -4.30384 | -1.52550 | -2.20813 | C | -8.80748 | -1.02007 | 0.01307  |
| H | -3.57113 | -1.80475 | -2.74451 | H | -9.53524 | -0.81967 | 0.59001  |
| C | 7.77009  | -2.35220 | -1.13368 | C | -6.66770 | -1.64044 | -1.66444 |
| H | 7.89342  | -3.27904 | -1.30159 | C | 6.48577  | -1.87966 | -0.80120 |
| C | -0.56585 | 7.45099  | 0.27597  | C | 7.14577  | 1.80752  | -0.57390 |
| C | -1.55781 | 5.16046  | -0.04718 | H | 7.87375  | 2.41216  | -0.65716 |
| H | -2.26444 | 5.67316  | -0.42173 | C | 6.27863  | -0.49938 | -0.58015 |
| C | 5.90929  | 2.28836  | -0.31860 | C | -7.34326 | 0.53619  | 1.31075  |
| H | 5.77727  | 3.22730  | -0.25930 | H | -8.06863 | 0.77881  | 1.87412  |
| C | 4.12322  | -2.28263 | -0.34072 | C | 10.29127 | -1.98959 | -1.50712 |
| H | 3.39689  | -2.89295 | -0.29052 | C | 5.34669  | -2.74406 | -0.71660 |
| C | -7.93124 | -2.18715 | -1.88435 | H | 5.44828  | -3.66456 | -0.92867 |



|   |           |          |          |   |           |          |          |
|---|-----------|----------|----------|---|-----------|----------|----------|
| C | 1.20023   | 4.03361  | 0.86838  | H | -0.06038  | 7.50757  | -1.74236 |
| H | 2.10063   | 3.91853  | 1.14847  | H | -0.89244  | 8.79415  | -1.28029 |
| C | -1.74368  | 7.92177  | 1.14354  | H | -1.63936  | 7.39699  | -1.50645 |
| H | -2.56482  | 7.47464  | 0.85003  | C | -0.11404  | -5.28707 | 3.30823  |
| H | -1.84943  | 8.89180  | 1.05234  | H | -0.60172  | -4.70833 | 3.93087  |
| H | -1.56787  | 7.69916  | 2.08159  | H | 0.16118   | -6.10601 | 3.77078  |
| C | 0.68424   | 8.21451  | 0.73879  | H | -0.69505  | -5.51772 | 2.55344  |
| H | 0.86946   | 7.99988  | 1.67689  | C | 10.90485  | -1.17514 | -2.66529 |
| H | 0.53062   | 9.17824  | 0.64842  | H | 11.78030  | -1.54819 | -2.89912 |
| H | 1.45017   | 7.95266  | 0.18638  | H | 11.01121  | -0.24138 | -2.38745 |
| C | -6.11821  | 1.08683  | 1.53110  | H | 10.31243  | -1.21853 | -3.44478 |
| H | -6.01030  | 1.71519  | 2.23546  | C | 11.13963  | -1.80157 | -0.24362 |
| C | -10.35329 | -2.60422 | -1.30270 | H | 10.77060  | -2.34721 | 0.48189  |
| C | 10.31946  | -3.47069 | -1.89546 | H | 11.12875  | -0.85755 | 0.01962  |
| H | 9.76588   | -3.61022 | -2.69200 | H | 12.06178  | -2.07941 | -0.42485 |
| H | 9.96869   | -4.00916 | -1.15552 | C | -11.32407 | -2.43662 | -0.14030 |
| H | 11.24180  | -3.74073 | -2.08727 | H | -11.56287 | -1.49068 | -0.04799 |
| C | 1.12719   | -4.55035 | 2.79124  | H | -10.90065 | -2.74891 | 0.68647  |
| C | 1.89407   | -5.49720 | 1.85604  | H | -12.13298 | -2.96254 | -0.31190 |
| H | 1.34110   | -5.70186 | 1.07318  | C | -10.97196 | -1.98838 | -2.57382 |
| H | 2.10525   | -6.32698 | 2.33269  | H | -11.82799 | -2.42529 | -2.76525 |
| H | 2.72520   | -5.06690 | 1.56528  | H | -10.36232 | -2.11872 | -3.33002 |
| C | 2.01359   | -4.18664 | 3.99169  | H | -11.11865 | -1.02948 | -2.43414 |
| H | 2.83110   | -3.74974 | 3.67372  | C | -10.13489 | -4.11377 | -1.51593 |
| H | 2.24851   | -5.00144 | 4.48298  | H | -4.97041  | -4.49672 | -0.72315 |
| H | 1.52660   | -3.57680 | 4.58446  | H | -9.56174  | -4.25358 | -2.29846 |
| C | -0.81179  | 7.82100  | -1.19693 | H | -10.99942 | -4.55154 | -1.66177 |

## Compound 2f (*chiral*)

Energy: -7503962.382 kJ/mol

|   |          |          |          |   |           |          |          |
|---|----------|----------|----------|---|-----------|----------|----------|
| C | 3.57994  | 2.65426  | -0.92695 | C | 7.25108   | 2.14639  | -1.23688 |
| C | 0.00096  | 0.46080  | -0.00124 | C | -10.27631 | -1.41179 | -0.44540 |
| C | 6.24870  | 0.18445  | -0.13110 | C | -5.24387  | -1.64591 | -1.03434 |
| C | 4.83401  | 2.04445  | -0.91180 | C | -1.51983  | 5.16212  | 0.13803  |
| C | 4.95099  | 0.74391  | -0.33191 | C | 0.81479   | 9.21164  | -1.28700 |
| C | -3.78109 | 0.06047  | -0.04492 | H | 1.84143   | 8.83816  | -1.34871 |
| C | -1.12449 | 2.66733  | 0.28597  | H | 0.85828   | 10.30695 | -1.29755 |
| C | -4.94538 | 0.79281  | 0.33618  | H | 0.28227   | 8.88474  | -2.18744 |
| C | 3.77798  | 0.02297  | 0.04524  | C | -1.30483  | 9.39139  | 0.01379  |
| C | -4.81335 | 2.09085  | 0.91915  | H | -1.90371  | 9.12563  | -0.86438 |
| C | 1.24122  | -0.21319 | -0.19590 | H | -1.18114  | 10.47962 | 0.00824  |
| C | 2.41639  | 1.99027  | -0.49891 | H | -1.87345  | 9.13085  | 0.91330  |
| C | 2.48057  | 0.57595  | -0.22912 | C | 6.02030   | 2.71033  | -1.38060 |
| C | -0.71118 | 4.02815  | 0.14999  | C | 10.25648  | -1.51942 | 0.45469  |
| C | 0.75367  | 4.01951  | -0.14289 | C | -10.28299 | -2.76030 | -1.19006 |
| C | -2.47688 | 0.59870  | 0.22894  | H | -9.72173  | -3.52934 | -0.64725 |
| C | -1.24648 | -0.20251 | 0.19068  | H | -9.85911  | -2.67287 | -2.19691 |
| C | -8.67191 | 0.37822  | 0.39992  | H | -11.31411 | -3.11567 | -1.29518 |
| C | 3.97751  | -1.19349 | 0.78994  | C | 0.85650   | 9.21507  | 1.24487  |
| C | -7.71357 | -1.51291 | -0.72449 | H | 0.35313   | 8.89200  | 2.16322  |
| C | 0.08627  | 8.72746  | -0.00820 | H | 0.90105   | 10.31041 | 1.24976  |
| C | 1.27019  | 6.50801  | -0.03551 | H | 1.88468   | 8.84175  | 1.27496  |
| C | -5.99183 | 2.76814  | 1.39183  | C | -10.93020 | -1.62384 | 0.94103  |
| C | -3.99496 | -1.15115 | -0.79325 | H | -11.94784 | -2.01578 | 0.82412  |
| C | 7.69212  | -1.59420 | 0.72766  | H | -10.99586 | -0.68979 | 1.50880  |
| C | -0.01278 | -2.31295 | -0.00763 | H | -10.35647 | -2.34137 | 1.53903  |
| C | 0.00743  | 1.87793  | 0.00145  | C | -11.12353 | -0.40677 | -1.26205 |
| C | -2.39697 | 2.01188  | 0.50197  | H | -10.68780 | -0.24285 | -2.25444 |
| C | 1.16048  | -1.61818 | -0.44401 | H | -11.19837 | 0.56513  | -0.76313 |
| C | -1.17903 | -1.60924 | 0.43168  | H | -12.14163 | -0.79161 | -1.39717 |
| C | 1.15035  | 2.65975  | -0.28135 | C | 10.91104  | -1.73610 | -0.93070 |
| C | 8.84022  | -0.94310 | 0.26633  | H | 10.98849  | -0.80174 | -1.49648 |
| C | -7.40690 | 0.94535  | 0.59823  | H | 10.33068  | -2.44601 | -1.53138 |
| C | 1.57513  | 5.15066  | -0.12993 | H | 11.92396  | -2.13965 | -0.81226 |
| C | -8.85358 | -0.85099 | -0.25899 | C | 11.11271  | -0.52501 | 1.27490  |
| C | -1.20884 | 6.52544  | 0.03755  | H | 12.12628  | -0.92107 | 1.41155  |
| C | 0.03044  | 7.17738  | -0.00237 | H | 10.67664  | -0.35809 | 2.26664  |
| C | 7.41442  | 0.87062  | -0.58921 | H | 11.19915  | 0.44688  | 0.77783  |
| C | -3.55325 | 2.68716  | 0.93376  | C | 10.24713  | -2.86922 | 1.19702  |
| C | 5.22055  | -1.70212 | 1.03189  | H | 9.67905   | -3.63135 | 0.65158  |
| C | 8.67304  | 0.28946  | -0.38981 | H | 9.82185   | -2.77903 | 2.20304  |
| C | 6.40337  | -1.05989 | 0.53938  | H | 11.27419  | -3.23567 | 1.30393  |
| C | -6.41870 | -0.99273 | -0.53752 | H | 2.14900   | 7.14512  | -0.02476 |
| C | -7.22870 | 2.21775  | 1.24894  | H | 2.64006   | 4.95046  | -0.18114 |
| C | -6.24943 | 0.24800  | 0.13607  | H | -2.08606  | 7.16025  | 0.02706  |

|   |          |          |          |   |          |          |          |
|---|----------|----------|----------|---|----------|----------|----------|
| H | -2.58608 | 4.97121  | 0.19626  | C | 1.00317  | -5.88162 | -0.62694 |
| H | 3.50909  | 3.66730  | -1.30438 | C | -1.06206 | -5.87116 | 0.59173  |
| H | 8.13865  | 2.66325  | -1.59361 | C | -0.03169 | -6.60247 | -0.02051 |
| H | 5.91288  | 3.68794  | -1.84428 | C | -0.07359 | -8.14234 | -0.00222 |
| H | 3.11397  | -1.69773 | 1.20430  | C | -1.36590 | -8.63076 | -0.69929 |
| H | 5.32765  | -2.60961 | 1.62128  | C | 1.13018  | -8.77152 | -0.72896 |
| H | 7.77155  | -2.54163 | 1.25002  | C | -0.06464 | -8.63811 | 1.46371  |
| H | 9.54289  | 0.82747  | -0.75759 | H | 2.98754  | -1.84454 | -1.59994 |
| H | -3.47103 | 3.69817  | 1.31429  | H | 2.86635  | -4.27733 | -1.78797 |
| H | -5.87312 | 3.74338  | 1.85777  | H | 1.81833  | -6.40191 | -1.11840 |
| H | -8.11009 | 2.74309  | 1.60859  | H | -1.88099 | -6.39312 | 1.07975  |
| H | -3.13765 | -1.66316 | -1.21104 | H | -2.91164 | -4.25685 | 1.76622  |
| H | -5.36168 | -2.55037 | -1.62637 | H | -3.00666 | -1.82240 | 1.59001  |
| H | -9.53526 | 0.92448  | 0.77088  | H | 1.05242  | -9.86370 | -0.68853 |
| H | -7.80409 | -2.45809 | -1.24914 | H | 2.08137  | -8.49033 | -0.26292 |
| C | 2.16604  | -2.37624 | -1.13520 | H | 1.16672  | -8.48136 | -1.78517 |
| C | -0.01950 | -3.74522 | -0.01126 | H | -1.39648 | -8.30025 | -1.74400 |
| C | 2.10026  | -3.73453 | -1.23989 | H | -1.41111 | -9.72650 | -0.68803 |
| C | 1.03909  | -4.47515 | -0.62227 | H | -2.26587 | -8.25505 | -0.20135 |
| C | -2.19187 | -2.36081 | 1.12118  | H | -0.92302 | -8.25908 | 2.02817  |
| C | -2.14081 | -3.71950 | 1.21946  | H | -0.10285 | -9.73380 | 1.49320  |
| C | -1.08735 | -4.46887 | 0.59677  | H | 0.84669  | -8.31588 | 1.98066  |

## Compound 2f (*meso*)

Energy: -7503971.074 kJ/mol

|   |          |          |          |   |           |          |          |
|---|----------|----------|----------|---|-----------|----------|----------|
| C | -3.63059 | 2.68370  | 0.00481  | C | -0.79227  | 8.38039  | 3.94648  |
| C | -0.00171 | 0.42156  | 0.33359  | H | -1.81943  | 8.00587  | 3.90043  |
| C | -5.89635 | 0.11359  | -1.46127 | H | -0.83193  | 9.41507  | 4.30658  |
| C | -4.79621 | 2.08088  | -0.46936 | H | -0.24838  | 7.78384  | 4.68775  |
| C | -4.75396 | 0.70330  | -0.83956 | C | 1.30776   | 8.97381  | 2.73865  |
| C | 3.56567  | -0.02555 | -0.62470 | H | 1.91310   | 8.46056  | 3.49393  |
| C | 1.15943  | 2.61005  | 0.56266  | H | 1.18375   | 10.01047 | 3.06963  |
| C | 4.74751  | 0.74758  | -0.84132 | H | 1.87004   | 8.99395  | 1.79848  |
| C | -3.56416 | -0.05797 | -0.62314 | C | -6.01402  | 2.82238  | -0.66660 |
| C | 4.77514  | 2.12623  | -0.47302 | C | -9.44196  | -1.68539 | -3.33416 |
| C | -1.25085 | -0.24074 | 0.44115  | C | 9.26563   | -3.06075 | -3.76373 |
| C | -2.45179 | 1.96055  | 0.24594  | H | 8.47247   | -3.16185 | -4.51321 |
| C | -2.44848 | 0.53418  | 0.04747  | H | 9.02012   | -3.70902 | -2.91486 |
| C | 0.72874  | 3.90418  | 0.97889  | H | 10.19241  | -3.43752 | -4.21063 |
| C | -0.76940 | 3.89521  | 0.98046  | C | -0.87134  | 9.18792  | 1.54778  |
| C | 2.44320  | 0.55590  | 0.04455  | H | -0.38099  | 9.17661  | 0.56764  |
| C | 1.25405  | -0.22999 | 0.43935  | H | -0.91683  | 10.22762 | 1.89226  |
| C | 8.20723  | 0.33062  | -2.23106 | H | -1.89932  | 8.83774  | 1.41401  |
| C | -3.52948 | -1.38207 | -1.19346 | C | 9.84069   | -0.76898 | -4.58122 |
| C | 7.01124  | -1.72725 | -2.53261 | H | 10.74547  | -1.17889 | -5.04617 |
| C | -0.08307 | 8.33058  | 2.56983  | H | 10.03858  | 0.27935  | -4.33442 |
| C | -1.26897 | 6.22401  | 1.87598  | H | 9.03570   | -0.79334 | -5.32483 |
| C | 5.98542  | 2.88005  | -0.67081 | C | 10.62711  | -1.54732 | -2.31213 |
| C | 3.54477  | -1.35033 | -1.19391 | H | 10.39098  | -2.13523 | -1.41759 |
| C | -6.99083 | -1.79269 | -2.53528 | H | 10.84818  | -0.52353 | -1.99264 |
| C | 0.01093  | -2.17048 | 1.31911  | H | 11.53851  | -1.96140 | -2.76017 |
| C | -0.00781 | 1.84385  | 0.38036  | C | -10.60898 | -1.64980 | -2.31852 |
| C | 2.43147  | 1.98296  | 0.24105  | H | -10.84095 | -0.62866 | -1.99827 |
| C | -1.24671 | -1.54266 | 1.01770  | H | -10.36807 | -2.23622 | -1.42428 |
| C | 1.26212  | -1.53152 | 1.01614  | H | -11.51549 | -2.07269 | -2.76824 |
| C | -1.18540 | 2.60134  | 0.56707  | C | -9.82752  | -0.86093 | -4.58567 |
| C | -8.18303 | -1.07732 | -2.68718 | H | -10.72749 | -1.27945 | -5.05230 |
| C | 7.09016  | 0.93256  | -1.63746 | H | -9.02135  | -0.87626 | -5.32824 |
| C | -1.58188 | 4.94244  | 1.42458  | H | -10.03635 | 0.18505  | -4.33790 |
| C | 8.19604  | -0.99989 | -2.68447 | C | -9.23038  | -3.14771 | -3.77002 |
| C | 1.21257  | 6.24283  | 1.87132  | H | -8.97916  | -3.79437 | -2.92161 |
| C | -0.02785 | 6.86316  | 2.06964  | H | -8.43547  | -3.23991 | -4.51879 |
| C | -7.09795 | 0.86499  | -1.63666 | H | -10.15282 | -3.53338 | -4.21831 |
| C | 3.60342  | 2.71774  | -0.00043 | H | -2.14428  | 6.81342  | 2.13078  |
| C | -4.61174 | -1.93656 | -1.81017 | H | -2.64521  | 4.72714  | 1.44338  |
| C | -8.20835 | 0.25228  | -2.23195 | H | 2.08728   | 6.83289  | 2.11522  |
| C | -5.85159 | -1.22678 | -1.93410 | H | 2.59557   | 4.74889  | 1.43343  |
| C | 5.86568  | -1.17232 | -1.93299 | H | -3.63693  | 3.75925  | 0.13299  |
| C | 7.09584  | 2.30748  | -1.21060 | H | -8.03331  | 2.81050  | -1.34284 |
| C | 5.89627  | 0.16901  | -1.46179 | H | -6.03280  | 3.86814  | -0.36956 |
| C | -7.11820 | 2.23908  | -1.20788 | H | -2.60511  | -1.94405 | -1.14926 |
| C | 9.46185  | -1.59588 | -3.32925 | H | -4.53881  | -2.93403 | -2.23702 |
| C | 4.63310  | -1.89454 | -1.80923 | H | -6.91695  | -2.81611 | -2.88736 |
| C | 1.53032  | 4.95479  | 1.41855  | H | -9.11280  | 0.84450  | -2.34458 |

|   |          |          |          |   |          |          |         |
|---|----------|----------|----------|---|----------|----------|---------|
| H | 3.59882  | 3.79350  | 0.12598  | C | 0.81293  | -7.32274 | 5.23452 |
| H | 5.99316  | 3.92637  | -0.37528 | C | -1.33182 | -7.99593 | 4.13844 |
| H | 8.00505  | 2.88816  | -1.34587 | C | 0.83217  | -8.40291 | 2.95297 |
| H | 2.62601  | -1.92151 | -1.14999 | H | -3.39452 | -1.68939 | 1.33045 |
| H | 4.57055  | -2.89311 | -2.23516 | H | -3.36148 | -3.88243 | 2.38171 |
| H | 9.10562  | 0.93198  | -2.34382 | H | -2.12369 | -5.83869 | 3.15154 |
| H | 6.94818  | -2.75184 | -2.88339 | H | 2.17690  | -5.82174 | 3.15229 |
| C | -2.44923 | -2.19996 | 1.45695  | H | 3.40195  | -3.84977 | 2.37993 |
| C | 0.01682  | -3.45316 | 1.96242  | H | 3.41178  | -1.65718 | 1.32841 |
| C | -2.43189 | -3.42219 | 2.05590  | H | -1.24360 | -8.98496 | 4.60165 |
| C | -1.20052 | -4.10932 | 2.30511  | H | -1.90212 | -8.11477 | 3.21014 |
| C | 2.47190  | -2.17755 | 1.45520  | H | -1.91240 | -7.36292 | 4.81907 |
| C | 2.46769  | -3.39916 | 2.05406  | H | 0.29241  | -6.63934 | 5.91536 |
| C | 1.24260  | -4.09915 | 2.30445  | H | 0.86010  | -8.30857 | 5.71278 |
| C | -1.17133 | -5.37713 | 2.91348  | H | 1.83949  | -6.96091 | 5.11489 |
| C | 1.22158  | -5.36299 | 2.91121  | H | 1.85869  | -8.07304 | 2.76177 |
| C | 0.02663  | -6.03126 | 3.21826  | H | 0.88103  | -9.39690 | 3.41384 |
| C | 0.07379  | -7.42173 | 3.87862  | H | 0.32473  | -8.50125 | 1.98630 |

## Compound (1a)<sup>+</sup>

Energy: -4486762.026 kJ/mol

|   |          |          |          |   |           |          |          |
|---|----------|----------|----------|---|-----------|----------|----------|
| C | 0.34709  | 2.25004  | -0.06412 | H | 0.69915   | 7.61479  | -0.21318 |
| C | 1.03968  | 0.95782  | -0.03796 | H | 0.39112   | 7.28791  | 1.51009  |
| C | 0.07353  | 0.00692  | 0.00080  | H | -0.038727 | 8.64892  | 0.70594  |
| C | -1.25077 | 0.66823  | -0.03812 | H | -1.12992  | 7.13401  | -1.96126 |
| C | -1.09025 | 2.01404  | -0.09646 | H | -2.03343  | 8.35022  | -1.04765 |
| C | -2.14244 | 2.97884  | -0.29173 | H | -2.78388  | 6.80652  | -1.42437 |
| C | -2.04791 | 4.31398  | -0.26543 | H | -1.95191  | 6.44953  | 2.25422  |
| C | -0.90543 | 5.18821  | 0.00793  | H | -3.27367  | 6.41101  | 1.07692  |
| C | 0.37089  | 4.76019  | 0.09544  | H | -2.52249  | 7.94231  | 1.49473  |
| C | 0.95416  | 3.44179  | -0.00544 | H | 1.26594   | -1.56209 | -1.87989 |
| C | 0.30793  | -1.44433 | 0.05210  | H | 1.64017   | -3.96773 | -1.78664 |
| C | -1.27046 | 6.70313  | 0.18418  | H | -0.25591  | -4.08793 | 2.10178  |
| C | -0.06956 | 7.60798  | 0.56825  | H | -0.60969  | -1.69206 | 1.99038  |
| C | -1.83753 | 7.27492  | -1.13586 | H | -0.61511  | -6.34119 | 1.60219  |
| C | -2.31369 | 6.88114  | 1.31361  | H | 0.96002   | -6.06805 | 2.37508  |
| C | 0.93333  | -2.11135 | -1.00249 | H | 0.66678   | -7.54315 | 1.45405  |
| C | 1.14339  | -3.49332 | -0.94330 | H | -0.81782  | -6.23273 | -0.97482 |
| C | 0.73024  | -4.25547 | 0.16639  | H | 0.39009   | -7.52764 | -0.98092 |
| C | 0.09609  | -3.56955 | 1.21456  | H | 0.64091   | -6.08585 | -1.96165 |
| C | -0.11200 | -2.18558 | 1.15861  | H | 3.03770   | -5.56776 | 0.91518  |
| C | 0.97757  | -5.77346 | 0.19552  | H | 2.92133   | -5.69278 | -0.84378 |
| C | 0.46724  | -6.46510 | 1.47992  | H | 2.69985   | -7.12934 | 0.15152  |
| C | 0.25881  | -6.43935 | -0.99770 | H | -3.13678  | 0.60930  | 1.90844  |
| C | 2.49271  | -6.05413 | 0.09741  | H | -5.26334  | -0.56283 | 1.89132  |
| C | -2.54305 | -0.03381 | -0.06503 | H | -4.38077  | -2.05777 | -2.07401 |
| C | 2.48683  | 0.71354  | -0.03255 | H | -0.25238  | -0.86769 | -2.03474 |
| C | -3.40963 | 0.03004  | 1.02880  | H | 2.55027   | -0.02189 | 1.99568  |
| C | -4.63343 | -0.65055 | 1.01067  | H | 4.94095   | -0.43444 | 2.00592  |
| C | -5.02519 | -1.41817 | -0.09831 | H | 5.18416   | 0.98687  | -2.07537 |
| C | -4.13605 | -1.47369 | -1.18950 | H | 2.77722   | 1.38945  | -2.06253 |
| C | -2.91394 | -0.79325 | -1.17475 | H | -7.49273  | -0.96532 | 1.28581  |
| C | 3.12456  | 0.20423  | 1.09986  | H | -6.71133  | -2.38493 | 2.01187  |
| C | 4.50528  | -0.03058 | 1.09641  | H | -8.16447  | -2.57624 | 1.03160  |
| C | 5.28984  | 0.24010  | -0.03666 | H | 6.93009   | -1.54449 | 1.49641  |
| C | 4.62974  | 0.75859  | -1.16771 | H | 7.21673   | 0.10735  | 2.08150  |
| C | 3.25056  | 0.99255  | -1.16722 | H | 8.46337   | -0.73896 | 1.16496  |
| C | -6.35803 | -2.18515 | -0.14995 | H | -7.38567  | -0.61123 | -1.27731 |
| C | -7.22607 | -2.01524 | 1.11736  | H | -8.16934  | -2.19552 | -1.38517 |
| C | 6.80722  | -0.01159 | -0.07616 | H | -6.70267  | -1.87522 | -2.30650 |
| C | 7.38126  | -0.57829 | 1.24209  | H | -5.45955  | -4.07369 | 0.50611  |
| C | -7.19768 | -1.68922 | -1.34711 | H | -5.55971  | -3.92092 | -1.25162 |
| C | -6.08037 | -3.69501 | -0.31457 | H | -7.01361  | -4.27026 | -0.31981 |
| C | 7.13496  | -1.02835 | -1.19096 | H | 6.60041   | -1.97265 | -1.03316 |
| C | 7.54636  | 1.31323  | -0.36323 | H | 8.20770   | -1.25279 | -1.21838 |
| H | -3.12406 | 2.56732  | -0.52268 | H | 6.86020   | -0.65721 | -2.18441 |
| H | -2.98381 | 4.82845  | -0.47701 | H | 7.30984   | 2.06911  | 0.39507  |
| H | 1.15504  | 5.48907  | 0.28902  | H | 7.28115   | 1.73299  | -1.33973 |
| H | 2.04320  | 3.45958  | 0.03724  | H | 8.63301   | 1.16796  | -0.36185 |

**Compound (1d)<sup>+</sup>****Energy: -5494388.608 kJ/mol**

|   |          |          |          |   |           |          |          |
|---|----------|----------|----------|---|-----------|----------|----------|
| C | 3.66992  | 0.39030  | 0.08958  | H | 8.62454   | 1.10779  | -1.03784 |
| C | 2.41775  | 0.92722  | 0.07291  | H | 8.40721   | -0.86149 | 2.19158  |
| C | 1.40478  | -0.15590 | 0.01449  | H | 8.64904   | 0.75728  | 1.51832  |
| C | 2.05192  | -1.35051 | -0.05526 | H | 9.91928   | -0.44652 | 1.37192  |
| C | 3.49031  | -1.05212 | -0.01665 | H | -0.11759  | 1.48867  | -1.52164 |
| C | 4.46081  | -1.96999 | -0.10124 | H | 2.07955   | -3.28988 | 1.82994  |
| C | 5.89671  | -1.79644 | -0.10103 | H | 1.29991   | 2.37104  | 2.09121  |
| C | 6.67460  | -0.70083 | 0.02820  | H | 2.89007   | 2.71972  | -1.89264 |
| C | 6.15481  | 0.65704  | 0.20829  | H | -4.61648  | 2.79233  | -2.32714 |
| C | 4.90044  | 1.12742  | 0.22905  | H | -2.17788  | 2.58982  | -2.33486 |
| C | -0.06590 | 0.01406  | 0.05003  | H | -2.56225  | -2.14358 | 2.46786  |
| C | 8.23938  | -0.80411 | 0.00510  | H | -5.00378  | -1.99129 | 2.42363  |
| C | 8.78124  | -2.24436 | -0.19561 | H | -7.05333  | -1.01184 | 1.50623  |
| C | 8.81791  | 0.03688  | -1.15718 | H | -6.80246  | 2.07720  | -1.49025 |
| C | 8.83180  | -0.30813 | 1.34575  | H | -8.82297  | 1.55663  | 1.98228  |
| C | -0.85096 | -0.72317 | 0.94929  | H | -9.02987  | -0.19975 | 2.02686  |
| C | -2.25072 | -0.63599 | 0.94559  | H | -10.33341 | 0.81426  | 1.43111  |
| C | -2.88408 | 0.26373  | 0.06381  | H | -8.87222  | 2.77881  | -0.34884 |
| C | -2.10741 | 1.05348  | -0.81164 | H | -10.33963 | 1.86221  | -0.70780 |
| C | -0.70900 | 0.90421  | -0.82003 | H | -8.98521  | 1.80262  | -1.82795 |
| C | 1.41909  | -2.67492 | -0.13222 | H | -8.91414  | -1.56415 | -0.13745 |
| C | 2.13750  | 2.37102  | 0.10269  | H | -8.83721  | -0.74703 | -1.70194 |
| C | 1.51190  | -3.56322 | 0.94273  | H | -10.30869 | -0.65201 | -0.72199 |
| C | 0.85593  | -4.79962 | 0.90663  | C | 1.38202   | 6.68598  | 0.13273  |
| C | 0.08884  | -5.18588 | -0.20433 | C | 0.70415   | 7.21622  | 1.41578  |
| C | 0.03277  | -4.29109 | -1.29082 | C | 0.47119   | 7.06828  | -1.05447 |
| C | 0.68621  | -3.05463 | -1.25706 | C | 2.73361   | 7.41934  | -0.00896 |
| C | 1.55888  | 2.97037  | 1.22108  | C | -0.67347  | -6.52111 | -0.26369 |
| C | 1.30666  | 4.34901  | 1.23812  | C | -0.08573  | -7.39606 | -1.39007 |
| C | 1.62434  | 5.16641  | 0.13966  | C | -2.16991  | -6.26164 | -0.54862 |
| C | 2.19725  | 4.54092  | -0.98364 | C | -0.60051  | -7.33941 | 1.04550  |
| C | 2.44559  | 3.16574  | -1.00524 | C | 0.43011   | -7.62097 | 1.29048  |
| C | -4.29805 | 0.36706  | 0.05448  | H | -1.17496  | -8.26989 | 0.96253  |
| C | -4.93540 | 1.27930  | -0.81011 | H | -1.01255  | -6.77926 | 1.89319  |
| C | -4.14868 | 2.07606  | -1.65532 | H | -0.18624  | -6.92423 | -2.37381 |
| C | -2.75507 | 1.96081  | -1.66057 | H | -0.59417  | -8.36581 | -1.44334 |
| C | -3.03279 | -1.43410 | 1.79062  | H | 0.98125   | -7.58740 | -1.22503 |
| C | -4.42628 | -1.34831 | 1.76333  | H | -2.33314  | -5.79671 | -1.52687 |
| C | -5.07242 | -0.44986 | 0.90319  | H | -2.60658  | -5.59924 | 0.20834  |
| C | -6.47389 | -0.35090 | 0.86476  | H | -2.74147  | -7.19722 | -0.54299 |
| C | -7.13923 | 0.56031  | 0.02172  | H | -0.27748  | 6.75426  | 1.57279  |
| C | -6.34129 | 1.36586  | -0.81002 | H | 0.54630   | 8.30006  | 1.35983  |
| C | -8.67788 | 0.61911  | 0.00428  | H | 1.31729   | 7.02715  | 2.30456  |
| C | -9.24283 | 0.70069  | 1.44113  | H | 3.41525   | 7.15192  | 0.80729  |
| C | -9.24466 | 1.83486  | -0.76368 | H | 2.59786   | 8.50696  | 0.01261  |
| C | -9.21351 | -0.65762 | -0.67581 | H | 3.23892   | 7.17754  | -0.95063 |
| H | 4.16846  | -3.01515 | -0.20290 | H | -0.48452  | 6.53312  | -1.00677 |
| H | 6.37669  | -2.76443 | -0.22935 | H | 0.93007   | 6.83702  | -2.02194 |
| H | 6.91323  | 1.42533  | 0.35025  | H | 0.25284   | 8.14269  | -1.05491 |
| H | 4.79457  | 2.19872  | 0.39384  | H | 0.85698   | 4.75899  | 2.13830  |
| H | 8.44949  | -2.67175 | -1.14894 | H | 2.46617   | 5.12047  | -1.86403 |
| H | 8.46683  | -2.91113 | 0.61576  | H | -0.53694  | -4.53897 | -2.18389 |
| H | 9.87815  | -2.25572 | -0.20733 | H | 0.95579   | -5.44072 | 1.77787  |
| H | 8.39162  | -0.27498 | -2.11783 | H | -0.36892  | -1.39982 | 1.65154  |
| H | 9.90625  | -0.07917 | -1.22436 | H | 0.59848   | -2.38324 | -2.10835 |

**Compound (1e)<sup>+</sup>****Energy: -6501990.421 kJ/mol**

|   |          |         |          |   |          |          |          |
|---|----------|---------|----------|---|----------|----------|----------|
| C | 0.77480  | 2.85916 | -0.12605 | C | -1.16295 | 5.35908  | 0.14805  |
| C | 1.20203  | 1.45316 | -0.16484 | C | 0.15175  | 5.99476  | 0.04391  |
| C | 0.06764  | 0.71238 | -0.10128 | C | 1.30777  | 5.32171  | -0.12714 |
| C | -1.10053 | 1.62293 | -0.02928 | C | 1.60066  | 3.90984  | -0.20667 |
| C | -0.67764 | 2.91125 | -0.00749 | C | -0.00263 | -0.75638 | -0.02385 |
| C | -1.52324 | 4.06995 | 0.12478  | C | 0.13299  | 7.55938  | 0.16266  |

|   |           |          |          |   |           |          |          |
|---|-----------|----------|----------|---|-----------|----------|----------|
| C | -0.44068  | 7.98271  | 1.53647  | H | 0.12634   | 7.52611  | 2.35636  |
| C | 1.53141   | 8.22542  | 0.06139  | H | -1.49097  | 7.69933  | 1.65895  |
| C | -0.72043  | 8.18109  | -0.96709 | H | -0.39257  | 9.07043  | 1.66663  |
| C | -0.65556  | -1.48873 | -1.01759 | H | 2.20128   | 7.88256  | 0.85865  |
| C | -0.80146  | -2.87703 | -0.90370 | H | 1.45772   | 9.31575  | 0.15757  |
| C | -0.29697  | -3.57579 | 0.20477  | H | 2.00589   | 8.02393  | -0.90598 |
| C | 0.37511   | -2.82430 | 1.18754  | H | -1.77677  | 7.90265  | -0.89829 |
| C | 0.51608   | -1.43723 | 1.07929  | H | -0.35516  | 7.86908  | -1.95239 |
| C | -2.50154  | 1.16838  | 0.01773  | H | -0.68320  | 9.27651  | -0.93146 |
| C | 2.57400   | 0.91924  | -0.18195 | H | -1.08022  | -0.98301 | -1.88192 |
| C | -3.35333  | 1.38863  | -1.07239 | H | -1.33580  | -3.38634 | -1.70072 |
| C | -4.65873  | 0.87423  | -1.08212 | H | 0.79136   | -3.30980 | 2.06747  |
| C | -5.11165  | 0.11329  | 0.01912  | H | 1.02325   | -0.89391 | 1.87314  |
| C | -4.26031  | -0.10515 | 1.12521  | H | -2.98536  | 1.94821  | -1.93067 |
| C | -2.96582  | 0.43385  | 1.11493  | H | -2.29799  | 0.25212  | 1.95509  |
| C | 3.00006   | 0.05357  | -1.19725 | H | 2.30813   | -0.21729 | -1.99278 |
| C | 4.29787   | -0.48238 | -1.19483 | H | 3.13738   | 1.92407  | 1.63862  |
| C | 5.19345   | -0.12537 | -0.16240 | H | -6.32769  | -2.01944 | 3.03825  |
| C | 4.77772   | 0.75807  | 0.85781  | H | -4.07926  | -1.05746 | 3.06074  |
| C | 3.46832   | 1.26032  | 0.84147  | H | -5.19283  | 1.66751  | -3.02535 |
| C | -6.41515  | -0.44362 | 0.00853  | H | -7.44758  | 0.71848  | -3.03304 |
| C | -6.86284  | -1.22022 | 1.09723  | H | -9.19576  | -0.62460 | -1.95173 |
| C | -6.00523  | -1.42271 | 2.18786  | H | -8.46540  | -2.37792 | 1.91771  |
| C | -4.72141  | -0.87211 | 2.20243  | H | -2.23995  | -4.88200 | 1.65710  |
| C | -5.51920  | 1.08312  | -2.16783 | H | -5.02396  | -5.02396 | 2.56979  |
| C | -6.80675  | 0.54021  | -2.17230 | H | -1.43285  | -6.45089 | 1.80950  |
| C | -7.26587  | -0.23056 | -1.09462 | H | -2.25011  | -5.37193 | -0.88105 |
| C | -8.55090  | -0.80100 | -1.09257 | H | -1.33333  | -6.85282 | -0.60593 |
| C | -9.02029  | -1.59192 | -0.02486 | H | -5.071700 | -5.64525 | -1.73426 |
| C | -8.15336  | -1.78083 | 1.06469  | H | 7.65758   | 0.89456  | 2.67110  |
| C | -0.47006  | -5.09413 | 0.38044  | H | 5.38462   | 1.79623  | 2.65890  |
| C | -1.26123  | -5.37631 | 1.67671  | H | 4.05153   | -1.66289 | -2.99300 |
| C | -1.23548  | -5.77400 | -0.77709 | H | 6.31991   | -2.57883 | -2.96291 |
| C | 6.50841   | -0.65499 | -0.14768 | H | 8.53658   | -2.72872 | -1.92917 |
| C | 7.40617   | -0.29218 | 0.87674  | H | 9.37989   | -0.51694 | 1.67369  |
| C | 6.98038   | 0.59715  | 1.87345  | H | 11.46653  | -0.39553 | -0.70925 |
| C | 5.68214   | 1.11254  | 1.86686  | H | 11.05709  | -1.45033 | -2.06611 |
| C | 4.72654   | -1.36767 | -2.19253 | H | 12.47553  | -1.80411 | -1.07043 |
| C | 6.02239   | -1.89114 | -2.17432 | H | 11.40211  | -1.28384 | 1.67241  |
| C | 6.92512   | -1.54362 | -1.15880 | H | 12.20597  | -2.79418 | 1.28549  |
| C | 8.23350   | -2.06086 | -1.12631 | H | 10.60221  | -2.82691 | 2.03143  |
| C | 9.14515   | -1.73320 | -0.10442 | H | 10.34893  | -3.86245 | -1.65240 |
| C | 8.70686   | -0.82832 | 0.87906  | H | 9.93080   | -4.40061 | -0.01648 |
| C | 10.57597  | -2.30411 | -0.10195 | H | 11.62273  | -4.19349 | -0.49447 |
| C | 11.44185  | -1.44084 | -1.03961 | H | -9.80228  | -3.88108 | -1.35299 |
| C | 11.22725  | -2.29965 | 1.30122  | H | -10.45751 | -2.51792 | -2.26754 |
| C | 10.61616  | -3.76983 | -0.59449 | H | -11.54679 | -3.57839 | -1.38024 |
| C | -10.42974 | -2.20835 | -0.08210 | H | -10.07721 | -3.93994 | 1.22693  |
| C | -10.56452 | -3.09293 | -1.34141 | H | -11.78113 | -3.52323 | 1.03971  |
| C | -10.77422 | -3.09887 | 1.13347  | H | -10.75242 | -2.53056 | 2.07056  |
| C | -11.48215 | -1.08086 | -0.13785 | H | -11.37473 | -0.45853 | -1.03306 |
| C | 0.91492   | -5.76923 | 0.47273  | H | -11.39905 | -0.42044 | 0.73349  |
| H | -2.58751  | 3.86852  | 0.23761  | H | -12.49921 | -1.48986 | -0.15062 |
| H | -1.99898  | 6.04640  | 0.26792  | H | 1.48789   | -5.42341 | 1.34004  |
| H | 2.23461   | 5.88681  | -0.20143 | H | 1.51466   | -5.56258 | -0.42155 |
| H | 2.66552   | 3.71557  | -0.33301 | H | 0.81853   | -6.85729 | 0.56611  |

## Compound (1f)<sup>+</sup>

Energy: -7509594.912 kJ/mol

|   |          |          |          |   |          |          |          |
|---|----------|----------|----------|---|----------|----------|----------|
| C | 0.58603  | 3.92141  | -0.20988 | C | -0.61361 | -1.91114 | -1.01729 |
| C | 1.07931  | 2.54071  | -0.30406 | C | 0.08229  | -2.54163 | 0.03881  |
| C | -0.01396 | 1.74216  | -0.20027 | C | 0.73256  | -1.76242 | 1.01992  |
| C | -1.22227 | 2.59017  | -0.06936 | C | -0.36538 | -0.36538 | 0.93447  |
| C | -0.86049 | 3.89706  | -0.02413 | C | -2.59946 | 2.06936  | -0.00095 |
| C | -1.75422 | 5.01228  | 0.16238  | C | 2.47576  | 2.06920  | -0.35414 |
| C | -1.45030 | 6.31414  | 0.23347  | C | -3.49709 | 2.31011  | -1.04994 |
| C | -0.16542 | 7.01056  | 0.14581  | C | -4.78435 | 1.75212  | -1.04129 |
| C | 1.00955  | 6.40213  | -0.11262 | C | -5.17133 | 0.92146  | 0.03380  |
| C | 1.35705  | 5.01224  | -0.29192 | C | -4.27247 | 0.67602  | 1.09601  |
| C | 0.01276  | 0.26996  | -0.12271 | C | -2.99814 | 1.26198  | 1.07034  |
| C | -0.23913 | 8.55773  | 0.39690  | C | 2.90244  | 1.16714  | -1.33780 |
| C | -0.78993 | 8.83763  | 1.81616  | C | 4.20156  | 0.63501  | -1.31900 |
| C | 1.13078  | 9.28406  | 0.32124  | C | 5.10481  | 1.04693  | -0.31461 |
| C | -1.14520 | 9.24095  | -0.65298 | C | 4.69691  | 1.98402  | 0.65941  |
| C | -0.63650 | -0.50869 | -1.08784 | C | 3.38227  | 2.47103  | 0.63666  |

|   |           |          |          |   |           |          |          |
|---|-----------|----------|----------|---|-----------|----------|----------|
| C | -6.45667  | 0.32326  | 0.04068  | H | -0.79858  | 9.02625  | -1.67040 |
| C | -6.83877  | -0.52274 | 1.10211  | H | -1.14345  | 10.33016 | -0.52509 |
| C | -5.93402  | -0.75370 | 2.14804  | H | -1.16624  | -0.01816 | -1.90219 |
| C | -4.66839  | -0.16163 | 2.14599  | H | 1.17287   | 0.23768  | 1.69359  |
| C | -5.69111  | 1.98836  | -2.08296 | H | -3.18095  | 2.92636  | -1.89002 |
| C | -6.96680  | 1.40503  | -2.06956 | H | -2.29701  | 1.86428  | 1.87928  |
| C | -7.35492  | 0.56531  | -1.01807 | H | 2.20407   | 0.84702  | -2.10910 |
| C | -8.62114  | -0.04556 | -0.99952 | H | 3.05353   | 3.15973  | 1.41322  |
| C | -9.02579  | -0.90447 | 0.04176  | H | -6.20436  | -1.40562 | 2.97582  |
| C | -8.11224  | -1.12220 | 1.08693  | H | -3.98895  | -0.37139 | 2.96938  |
| C | 0.13087   | -3.95603 | 0.11550  | H | -5.41608  | 2.62745  | -2.91921 |
| C | 0.83358   | -4.58510 | 1.16437  | H | -7.63930  | 1.60705  | -2.89546 |
| C | 1.47487   | -3.79354 | 2.12717  | H | -9.30277  | 0.15263  | -1.82487 |
| C | 1.42397   | -2.40008 | 2.05717  | H | -8.37266  | -1.77327 | 1.91757  |
| C | -1.26278  | -2.70403 | -1.97272 | H | 2.02569   | -4.25630 | 2.94298  |
| C | -1.21740  | -4.09892 | -1.89331 | H | 1.93812   | -1.81619 | 2.81750  |
| C | -0.52083  | -4.73906 | -0.85765 | H | -1.81328  | -2.24184 | -2.78931 |
| C | -0.45592  | -6.14112 | -0.76738 | H | -1.73277  | -4.68335 | -2.65221 |
| C | 0.24427   | -6.79661 | 0.26557  | H | -0.96449  | -6.73147 | -1.52766 |
| C | 0.88062   | -5.98980 | 1.22339  | H | 1.43380   | -6.44154 | 2.04278  |
| C | 6.41683   | 0.51209  | -0.27572 | H | 7.59232   | 2.22438  | 2.43615  |
| C | 7.32237   | 0.93178  | 0.71933  | H | 5.31870   | 3.12382  | 2.39277  |
| C | 6.90828   | 1.88275  | 1.66257  | H | 3.93745   | -0.65112 | -3.04092 |
| C | 5.61010   | 2.39702  | 1.63771  | H | 6.19705   | -1.58379 | -2.96290 |
| C | 4.61966   | -0.30975 | -2.26525 | H | 8.40661   | -1.70711 | -1.91765 |
| C | 5.91066   | -0.84361 | -2.21895 | H | 9.30231   | 0.74388  | 1.51391  |
| C | 6.82047   | -0.44366 | -1.22935 | H | 11.40901  | 0.76315  | -0.49010 |
| C | 8.12120   | -0.97779 | -1.16387 | H | 11.08509  | -0.17022 | -1.95483 |
| C | 9.03938   | -0.59421 | -0.16287 | H | 12.42962  | -0.62335 | -0.89696 |
| C | 8.61767   | 0.38547  | 0.74921  | H | 11.14920  | -0.31189 | 1.80228  |
| C | 10.46312  | -1.17963 | -0.11092 | H | 11.96157  | -1.80305 | 1.36866  |
| C | 11.39899  | -0.25061 | -0.90735 | H | 10.29808  | -1.85790 | 1.97117  |
| C | 10.99202  | -1.29171 | 1.33887  | H | 10.36614  | -2.60463 | -1.79448 |
| C | 10.55237  | -2.60067 | -0.71510 | H | 9.83230   | -3.27901 | -0.24264 |
| C | 0.29326   | -8.33442 | 0.31230  | H | 11.55220  | -3.02878 | -0.57435 |
| C | 0.94566   | -8.87181 | -0.97995 | H | 1.95529   | -8.46450 | -1.11064 |
| C | 1.10488   | -8.90032 | 1.50018  | H | 0.36868   | -8.61347 | -1.87468 |
| C | -1.13963  | -8.89624 | 0.43134  | H | 1.02740   | -9.96482 | -0.95651 |
| C | -10.41661 | -1.56340 | 0.00247  | H | 2.15054   | -8.57287 | 1.46714  |
| C | -10.55926 | -2.40452 | -1.28532 | H | 1.11099   | -9.99690 | 1.48787  |
| C | -10.69663 | -2.50834 | 1.19318  | H | 0.68004   | -8.59222 | 2.46263  |
| C | -11.50686 | -0.47086 | 0.01921  | H | -1.76032  | -8.63649 | -0.43314 |
| H | -2.80735  | 4.76085  | 0.27851  | H | -1.64201  | -8.50852 | 1.32562  |
| H | -2.31373  | 6.95941  | 0.38842  | H | -1.13059  | -9.99022 | 0.50192  |
| H | 1.91040   | 7.00947  | -0.17169 | H | -9.77439  | -3.16777 | -1.34666 |
| H | 2.42178   | 4.87478  | -0.47939 | H | -10.49420 | -1.79227 | -2.19133 |
| H | -0.18181  | 8.33701  | 2.57906  | H | -11.52724 | -2.91836 | -1.31675 |
| H | -1.82397  | 8.49974  | 1.93936  | H | -9.97457  | -3.33236 | 1.23225  |
| H | -0.78165  | 9.91120  | 2.03897  | H | -11.69407 | -2.95767 | 1.11494  |
| H | 1.83509   | 8.89812  | 1.06759  | H | -10.65944 | -1.97488 | 2.15008  |
| H | 1.02020   | 10.35785 | 0.51681  | H | -11.44915 | 0.18548  | -0.85601 |
| H | 1.58483   | 9.18782  | -0.67174 | H | -11.41816 | 0.16110  | 0.91080  |
| H | -2.18928  | 8.92080  | -0.58023 | H | -12.50980 | -0.91358 | 0.02265  |

## Compound (4a)<sup>+</sup>

Energy: -4483663.045 kJ/mol

|   |          |          |          |   |          |          |          |
|---|----------|----------|----------|---|----------|----------|----------|
| C | 0.25974  | 2.25085  | -0.22222 | C | -2.05839 | -3.79778 | -0.06536 |
| C | -0.61735 | 1.23607  | 0.01393  | C | -0.68245 | -3.78089 | 0.16625  |
| C | 0.13035  | -0.04648 | 0.13070  | C | 0.02077  | -2.57844 | 0.26458  |
| C | 1.46372  | 0.21862  | 0.07177  | C | -2.80481 | -5.13700 | -0.19787 |
| C | 1.58903  | 1.67340  | -0.07367 | C | -2.22165 | -5.93936 | -1.38163 |
| C | 2.74064  | 2.35738  | -0.00980 | C | -2.63722 | -5.95526 | 1.10112  |
| C | 2.92245  | 3.79213  | 0.08129  | C | -4.32269 | -4.99162 | -0.45101 |
| C | 2.09345  | 4.81269  | -0.22606 | C | 2.59093  | -0.71687 | 0.08047  |
| C | 0.76949  | 4.61782  | -0.81990 | C | -2.09694 | 1.23785  | 0.05306  |
| C | -0.03370 | 3.54521  | -0.78783 | C | 3.07203  | -1.25601 | -1.11312 |
| C | -0.61504 | -1.33431 | 0.14028  | C | 4.15951  | -2.13523 | -1.10007 |
| C | 2.50198  | 6.30467  | -0.00038 | C | 4.80430  | -2.49405 | 0.10059  |
| C | 1.40575  | 7.05502  | 0.79429  | C | 4.31244  | -1.92904 | 1.28933  |
| C | 3.81300  | 6.48373  | 0.80883  | C | 3.22316  | -1.04949 | 1.28062  |
| C | 2.72143  | 7.00796  | -1.35842 | C | -2.78075 | 0.00250  | -0.01900 |
| C | -2.02573 | -1.30249 | -0.02837 | C | -4.19910 | 0.05180  | 0.01223  |
| C | -2.69912 | -2.54860 | -0.15552 | C | -4.94680 | 1.24355  | 0.14234  |

|   |          |          |          |   |          |          |          |
|---|----------|----------|----------|---|----------|----------|----------|
| C | -4.22574 | 2.42599  | 0.28779  | H | -3.18838 | -6.90139 | 1.04632  |
| C | -2.82978 | 2.41852  | 0.26085  | H | -3.01349 | -5.39966 | 1.96831  |
| C | 5.99558  | -3.46807 | 0.07446  | H | -4.52669 | -4.44913 | -1.38154 |
| C | 7.12409  | -2.88773 | -0.80519 | H | -4.82019 | -4.46252 | 0.37020  |
| C | -6.48506 | 1.19772  | 0.16614  | H | -4.80427 | -5.97300 | -0.53907 |
| C | -7.01075 | 0.52210  | -1.11977 | H | 2.60055  | -0.99999 | -2.05950 |
| C | 6.60266  | -3.75029 | 1.46740  | H | 4.49773  | -2.53876 | -2.05217 |
| C | 5.54193  | -4.82348 | -0.50933 | H | 4.75997  | -2.15517 | 2.25318  |
| C | -6.95876 | 0.39193  | 1.39452  | H | 2.86853  | -0.62895 | 2.21943  |
| C | -7.14865 | 2.59170  | 0.24658  | H | -4.76736 | -0.87078 | -0.03404 |
| H | 3.67038  | 1.80201  | 0.10879  | H | -4.71792 | 3.38206  | 0.44059  |
| H | 3.90557  | 4.01627  | 0.48955  | H | -2.32671 | 3.36461  | 0.43907  |
| H | 0.37374  | 5.47334  | -1.36448 | H | 7.44686  | -1.90692 | -0.43628 |
| H | -0.97196 | 3.62203  | -1.33307 | H | 6.81384  | -2.76099 | -1.84813 |
| H | 1.19935  | 6.55530  | 1.74804  | H | 8.00000  | -3.54705 | -0.81021 |
| H | 0.46307  | 7.12598  | 0.24147  | H | -6.68820 | -0.52126 | -1.20433 |
| H | 1.71391  | 8.08318  | 1.01871  | H | -6.65841 | 1.04939  | -2.01424 |
| H | 3.74950  | 5.99716  | 1.78911  | H | -8.10683 | 0.51878  | -1.14461 |
| H | 4.02436  | 7.54493  | 0.98912  | H | 6.97927  | -2.83379 | 1.93644  |
| H | 4.67973  | 6.07891  | 0.27376  | H | 7.44716  | -4.44636 | 1.39665  |
| H | 1.80420  | 7.06326  | -1.95348 | H | 5.86844  | -4.20355 | 2.14360  |
| H | 3.47577  | 6.48325  | -1.95632 | H | 5.19489  | -4.73345 | -1.54455 |
| H | 3.06922  | 8.03816  | -1.21680 | H | 4.71957  | -5.25017 | 0.07720  |
| H | -3.76659 | -2.54814 | -0.33432 | H | 6.36371  | -5.54911 | -0.50870 |
| H | -0.12050 | -4.70744 | 0.26243  | H | -6.61858 | -0.64900 | 1.36350  |
| H | 1.08593  | -2.66182 | 0.43788  | H | -8.05316 | 0.37061  | 1.45500  |
| H | -1.16522 | -6.18867 | -1.23340 | H | -6.58177 | 0.83292  | 2.32495  |
| H | -2.29788 | -5.37289 | -2.31739 | H | -6.86308 | 3.22304  | -0.60298 |
| H | -2.75742 | -6.88577 | -1.52002 | H | -6.87643 | 3.11700  | 1.16942  |
| H | -1.58985 | -6.20673 | 1.30089  | H | -8.24223 | 2.50995  | 0.23650  |

### Compound (4d)<sup>+</sup>

Energy: -5491253.190 kJ/mol

|   |          |          |          |   |           |          |          |
|---|----------|----------|----------|---|-----------|----------|----------|
| C | 3.66338  | 0.14264  | 0.21096  | C | -8.55526  | 1.10417  | -0.21521 |
| C | 2.45365  | 0.74680  | 0.07692  | C | -9.06720  | 1.02172  | 1.23925  |
| C | 1.40596  | -0.32323 | -0.01364 | C | -8.99932  | 2.47345  | -0.77799 |
| C | 2.01162  | -1.57315 | 0.20298  | C | -9.25233  | 0.01699  | -1.06173 |
| C | 3.46446  | -1.30045 | 0.14383  | H | 4.17010   | -3.21816 | -0.33076 |
| C | 4.43296  | -2.18150 | -0.14677 | H | 6.27311   | -2.80706 | -0.90993 |
| C | 5.83475  | -1.93615 | -0.42701 | H | 6.90913   | 1.00414  | 0.87036  |
| C | 6.61700  | -0.86032 | -0.19677 | H | 4.76523   | 1.76978  | 1.10488  |
| C | 6.13687  | 0.35555  | 0.46103  | H | 7.98898   | -2.15187 | -2.36679 |
| C | 4.88503  | 0.81193  | 0.60097  | H | 8.48819   | -2.99341 | -0.87954 |
| C | 0.01094  | -0.20730 | -0.18396 | H | 9.46798   | -1.96961 | -1.74274 |
| C | 8.12657  | -0.83435 | -0.60601 | H | 7.78747   | 0.44572  | -2.35563 |
| C | 8.57580  | -2.05881 | -1.44557 | H | 9.47353   | 0.40339  | -1.82030 |
| C | 8.43412  | 0.41165  | -1.47100 | H | 8.29795   | 1.34792  | -0.91964 |
| C | 9.02014  | -0.81628 | 0.65500  | H | 8.80346   | -1.67339 | 1.30331  |
| C | -0.81713 | -1.33877 | 0.04242  | H | 8.88703   | 0.09320  | 1.24957  |
| C | -2.25752 | -1.08583 | 0.14344  | H | 10.08210  | -0.86468 | 0.38621  |
| C | -2.80844 | 0.15537  | -0.27230 | H | 0.05092   | 1.83091  | -0.91048 |
| C | -1.95694 | 1.18553  | -0.69070 | H | 2.85126   | -4.07212 | 0.98200  |
| C | -0.57903 | 1.00078  | -0.60422 | H | 1.30189   | 2.09505  | 2.13001  |
| C | 1.24769  | -2.73804 | 0.35375  | H | 3.21697   | 2.66241  | -1.68345 |
| C | 2.27963  | 2.20262  | 0.20736  | H | -4.23558  | 3.57387  | -1.53143 |
| C | 1.81061  | -3.99159 | 0.68396  | H | -1.82248  | 3.20308  | -1.47045 |
| C | 1.06890  | -5.17308 | 0.67456  | H | -2.85640  | -2.88374 | 1.22140  |
| C | -0.26973 | -5.15535 | 0.30942  | H | -5.22325  | -2.50139 | 1.18528  |
| C | -0.83733 | -3.88657 | 0.06290  | H | -7.14676  | -1.09397 | 0.62531  |
| C | -0.15469 | -2.64125 | 0.17634  | H | -6.49525  | 2.80427  | -1.08431 |
| C | 1.65692  | 2.74577  | 1.33329  | H | -8.56834  | 1.76244  | 1.87550  |
| C | 1.46993  | 4.12907  | 1.44561  | H | -8.89406  | 0.03604  | 1.68483  |
| C | 1.90343  | 5.00923  | 0.44018  | H | -10.14588 | 1.21084  | 1.29000  |
| C | 2.53920  | 4.44331  | -0.68225 | H | -8.57660  | 3.30373  | -0.20030 |
| C | 2.72658  | 3.06232  | -0.79837 | H | -10.09023 | 2.58021  | -0.74242 |
| C | -4.21425 | 0.40339  | -0.26068 | H | -8.69779  | 2.59642  | -1.82476 |
| C | -4.74049 | 1.63000  | -0.72356 | H | -9.08429  | -0.98992 | -0.66431 |
| C | -3.86070 | 2.61782  | -1.17378 | H | -8.88718  | 0.02789  | -2.09556 |
| C | -2.48457 | 2.40305  | -1.14413 | H | -10.33719 | 0.17272  | -1.08944 |
| C | -3.19343 | -1.98321 | 0.71506  | C | 1.70370   | 6.53261  | 0.52648  |
| C | -4.57351 | -1.75059 | 0.74121  | C | 1.00111   | 6.99841  | 1.82168  |
| C | -5.10029 | -0.56815 | 0.23133  | C | 0.83653   | 7.00754  | -0.65956 |
| C | -6.48514 | -0.32228 | 0.23547  | C | 3.07401   | 7.24184  | 0.47049  |
| C | -7.03265 | 0.88325  | -0.24051 | C | -1.11874  | -6.43015 | 0.17326  |
| C | -6.13141 | 1.84888  | -0.71484 | C | -0.35846  | -7.72559 | 0.53858  |

|   |          |          |          |   |          |          |          |
|---|----------|----------|----------|---|----------|----------|----------|
| C | -1.59758 | -6.57763 | -1.28706 | H | 0.88369  | 8.08868  | 1.83716  |
| C | -2.34734 | -6.34665 | 1.10513  | H | 1.57616  | 6.72369  | 2.71363  |
| H | -2.04228 | -6.19844 | 2.14778  | H | 3.72773  | 6.90135  | 1.28226  |
| H | -2.94160 | -7.26680 | 1.05884  | H | 2.96103  | 8.32811  | 0.56640  |
| H | -3.01690 | -5.52222 | 0.83747  | H | 3.59852  | 7.05740  | -0.47341 |
| H | 0.50874  | -7.88275 | -0.11339 | H | -0.13506 | 6.49920  | -0.66632 |
| H | -1.00373 | -8.60593 | 0.43214  | H | 1.31487  | 6.81460  | -1.62610 |
| H | -0.00643 | -7.70694 | 1.57662  | H | 0.64841  | 8.08619  | -0.60482 |
| H | -0.74790 | -6.61382 | -1.97920 | H | 0.97160  | 4.49036  | 2.34099  |
| H | -2.23964 | -5.74660 | -1.59895 | H | 2.89799  | 5.07475  | -1.49229 |
| H | -2.17705 | -7.49845 | -1.42187 | H | -1.86366 | -3.87503 | -0.29641 |
| H | -0.00189 | 6.56586  | 1.91487  | H | 1.58531  | -6.09447 | 0.92650  |

## Compound (4e)<sup>+</sup>

Energy: -6498847.177 kJ/mol

|   |           |          |          |   |           |          |          |
|---|-----------|----------|----------|---|-----------|----------|----------|
| C | -0.89485  | 2.58075  | 0.11295  | C | 11.32341  | -1.52647 | 1.61488  |
| C | -1.21310  | 1.27588  | -0.09529 | C | 11.11338  | -2.76647 | -0.52878 |
| C | 0.06072   | 0.49733  | -0.22307 | C | 11.59553  | -0.32774 | -0.58232 |
| C | 1.14353   | 1.35042  | 0.05096  | C | -0.30377  | -6.06283 | -0.98011 |
| C | 0.55611   | 2.70761  | 0.07586  | H | 2.28797   | 3.82793  | -0.30410 |
| C | 1.21437   | 3.85651  | -0.13742 | H | 1.44520   | 5.83097  | -0.77363 |
| C | 0.67812   | 5.18683  | -0.34870 | H | -2.46441  | 5.52365  | 0.87726  |
| C | -0.54857  | 5.70244  | -0.12107 | H | -2.75013  | 3.25851  | 0.98634  |
| C | -1.64912  | 4.93356  | 0.46250  | H | 0.48008   | 7.44931  | -2.16063 |
| C | -1.82515  | 3.60688  | 0.52940  | H | 1.14343   | 8.02942  | -0.61381 |
| C | 0.27447   | -0.87336 | -0.44509 | H | -0.07702  | 8.96927  | -1.46231 |
| C | -0.89171  | 7.19213  | -0.45508 | H | -2.00665  | 6.68473  | -2.27559 |
| C | 0.23101   | 7.94573  | -1.21553 | H | -2.35493  | 8.30511  | -1.65583 |
| C | -2.14543  | 7.27041  | -1.35925 | H | -3.04644  | 6.90094  | -0.85846 |
| C | -1.14720  | 7.98568  | 0.84647  | H | -0.28569  | 7.92249  | 1.52152  |
| C | 1.60004   | -1.37249 | -0.34114 | H | -2.02497  | 7.62456  | 1.39185  |
| C | 1.71943   | -2.79240 | -0.34452 | H | -1.32334  | 9.04673  | 0.63306  |
| C | 0.67217   | -3.70186 | -0.60607 | H | -2.67466  | -3.22681 | -0.06048 |
| C | -0.57701  | -3.15147 | -0.85140 | H | -1.44311  | -3.76449 | -1.08331 |
| C | -0.77026  | -1.77286 | -0.75847 | H | -1.77838  | -1.41832 | -0.94501 |
| C | 2.45373   | 0.86885  | 0.21065  | H | 3.21942   | 2.64045  | 1.18581  |
| C | -2.59783  | 0.78570  | -0.02267 | H | -2.34517  | -0.09720 | 1.92498  |
| C | 3.47275   | 1.67419  | 0.75566  | H | -3.13634  | 1.57862  | -1.95045 |
| C | 4.80275   | 1.26377  | 0.82466  | H | 6.28613   | -3.20331 | -1.55471 |
| C | 5.16257   | 0.03076  | 0.26328  | H | 3.96908   | -2.57448 | -1.54604 |
| C | 4.15730   | -0.82060 | -0.26674 | H | 5.50060   | 3.04363  | 1.84742  |
| C | 2.74166   | -0.47282 | -0.14109 | H | 7.84956   | 2.37643  | 1.86742  |
| C | -3.03863  | 0.08217  | 1.10500  | H | 9.60586   | 0.79605  | 1.24934  |
| C | -4.35303  | -0.40141 | 1.17976  | H | 8.59834   | -2.78935 | -0.91267 |
| C | -5.24161  | -0.16472 | 0.10603  | H | 3.00761   | -5.10609 | -1.34035 |
| C | -4.80476  | 0.55588  | -1.02871 | H | 1.78924   | -5.22764 | -2.61505 |
| C | -3.48447  | 1.02557  | -1.07954 | H | 2.21816   | -6.64853 | -1.64911 |
| C | 6.54430   | -0.32465 | 0.23430  | H | 2.30432   | -5.18060 | 1.12883  |
| C | 6.95924   | -1.51205 | -0.39200 | H | 1.52861   | -6.74026 | 0.86222  |
| C | 5.99813   | -2.30643 | -1.01076 | H | 0.60571   | -5.40091 | 1.56223  |
| C | 4.64454   | -1.95392 | -0.96222 | H | -7.67891  | 0.49419  | -2.85519 |
| C | 5.77742   | 2.08969  | 1.40320  | H | -5.38953  | 1.33521  | -2.96382 |
| C | 7.11883   | 1.71259  | 1.41133  | H | -4.13704  | -1.31364 | 3.13184  |
| C | 7.51952   | 0.51227  | 0.81847  | H | -6.43224  | -2.15400 | 3.23130  |
| C | 8.87386   | 0.13512  | 0.78820  | H | -8.65096  | -2.41122 | 2.21309  |
| C | 9.30685   | -1.05633 | 0.17682  | H | -9.43714  | -0.71562 | -1.67096 |
| C | 8.32288   | -1.86320 | -0.41464 | H | -11.39994 | -0.49660 | 1.56743  |
| C | 0.93245   | -5.21724 | -0.59723 | H | -10.88661 | -1.87315 | 2.54963  |
| C | 2.04953   | -5.56613 | -1.60517 | H | -12.41835 | -1.94059 | 1.68305  |
| C | 1.36825   | -5.65672 | 0.81696  | H | -11.66254 | -0.77800 | -0.99338 |
| C | -6.57137  | -0.65221 | 0.16615  | H | -12.56493 | -2.27105 | -0.73538 |
| C | -7.46099  | -0.41880 | -0.90291 | H | -11.13879 | -2.28575 | -1.77200 |
| C | -7.01059  | 0.30121  | -2.01877 | H | -10.11821 | -4.05045 | 1.41865  |
| C | -5.70030  | 0.78220  | -2.08144 | H | -10.10939 | -4.17938 | -0.34376 |
| C | -4.80425  | -1.11888 | 2.29486  | H | -11.64271 | -4.14853 | 0.54134  |
| C | -6.11508  | -1.59917 | 2.35098  | H | 10.75715  | -2.27312 | 2.18422  |
| C | -7.00917  | -1.37432 | 1.29454  | H | 11.24818  | -0.57565 | 2.15363  |
| C | -8.33019  | -1.85359 | 1.33481  | H | 12.37897  | -1.82205 | 1.63464  |
| C | -9.24072  | -1.63681 | 0.28145  | H | 10.60511  | -3.60254 | -0.03434 |
| C | -8.77730  | -0.91217 | -0.82977 | H | 12.18812  | -2.98355 | -0.50544 |
| C | -10.67518 | -2.18782 | 0.37616  | H | 10.81091  | -2.75708 | -1.58243 |
| C | -11.38123 | -1.59194 | 1.61354  | H | 11.52119  | 0.64827  | -0.09040 |
| C | -11.55495 | -1.85972 | -0.85162 | H | 11.22971  | -0.20723 | -1.60896 |
| C | -10.63170 | -3.72586 | 0.50702  | H | 12.66123  | -0.57942 | -0.63538 |
| C | 10.80182  | -1.42098 | 0.16524  | H | -0.66379  | -5.81702 | -1.98600 |



|   |          |          |          |
|---|----------|----------|----------|
| H | -1.13023 | -5.91310 | -0.27559 |
| H | -0.06755 | -7.13373 | -0.97359 |

### Compound (4f)<sup>+</sup>

Energy: -7506432.872 kJ/mol

|   |          |          |          |   |           |          |          |
|---|----------|----------|----------|---|-----------|----------|----------|
| C | 1.24139  | -3.41144 | 0.78143  | C | -0.90039  | 9.35166  | 0.62262  |
| C | 1.46928  | -2.02745 | 0.50636  | C | -3.19565  | 8.77482  | -0.18929 |
| C | 0.21051  | -1.39259 | 0.42747  | C | -10.18313 | -0.51774 | -2.40785 |
| C | -0.82558 | -2.35630 | 0.65231  | C | -11.16439 | -0.30477 | -1.22987 |
| C | -0.20202 | -3.64112 | 0.83240  | C | -10.28698 | 0.69788  | -3.34783 |
| C | -0.80130 | -4.89870 | 0.89026  | C | -10.59647 | -1.78106 | -3.20118 |
| C | -0.24108 | -6.16677 | 1.07407  | H | -1.87580  | -4.92025 | 0.75571  |
| C | 1.08956  | -6.58867 | 1.25579  | H | -0.98217  | -6.95989 | 1.08461  |
| C | 2.19687  | -5.72737 | 1.18549  | H | 3.16953   | -6.18772 | 1.30743  |
| C | 2.25746  | -4.35316 | 0.94200  | H | 3.26413   | -3.94632 | 0.87843  |
| C | -0.12228 | 0.01594  | 0.27479  | H | 1.32116   | -8.62791 | -0.62310 |
| C | 1.30442  | -8.10246 | 1.50951  | H | -0.98217  | -8.75081 | 0.11129  |
| C | 0.78293  | -8.90480 | 0.29018  | H | 0.93648   | -9.97596 | 0.46113  |
| C | 2.78342  | -8.48152 | 1.72252  | H | 3.39842   | -8.27254 | 0.84017  |
| C | 0.52512  | -8.52028 | 2.78253  | H | 2.85157   | -9.55677 | 1.91558  |
| C | -1.51460 | 0.39033  | 0.23632  | H | 3.22345   | -7.96823 | 2.58481  |
| C | -1.84674 | 1.78594  | 0.43098  | H | -0.55186  | -8.34848 | 2.69132  |
| C | -0.81946 | 2.77054  | 0.33584  | H | 0.88115   | -7.97042 | 3.66087  |
| C | 0.53769  | 2.37321  | 0.14409  | H | 0.67272   | -9.58931 | 2.97087  |
| C | 0.85438  | 1.00564  | 0.18044  | H | 1.89732   | 0.72360  | 0.13848  |
| C | -2.20359 | -1.97989 | 0.56891  | H | -3.10514  | -3.71864 | 1.48199  |
| C | 2.82828  | -1.45950 | 0.32377  | H | 3.30431   | -1.49443 | 2.42696  |
| C | -3.28487 | -2.81475 | 0.91512  | H | 2.64990   | -1.31781 | -1.82181 |
| C | -4.59981 | -2.50873 | 0.57249  | H | -5.46165  | 1.57756  | -2.74053 |
| C | -4.85102 | -1.35346 | -0.24612 | H | -3.25022  | 1.26352  | -1.75451 |
| C | -3.80337 | -0.43598 | -0.51697 | H | -5.51367  | -4.21076 | 1.57100  |
| C | -2.50746 | -0.64417 | 0.08686  | H | -7.77946  | -3.77582 | 0.72060  |
| C | 3.66808  | -1.26182 | 1.42914  | H | -9.29881  | -2.45184 | -0.68998 |
| C | 4.96631  | -0.74784 | 1.27553  | H | -7.85111  | 0.95876  | -2.87087 |
| C | 5.43649  | -0.43547 | -0.03574 | H | 2.01432   | 5.45410  | -0.05397 |
| C | 4.58826  | -0.64522 | -1.16627 | H | 2.57426   | 3.05433  | -0.15912 |
| C | 3.29752  | -1.15404 | -0.96407 | H | -3.91607  | 1.51184  | 1.04792  |
| C | -6.15169 | -1.14241 | -0.77982 | H | -4.42468  | 3.86921  | 1.31730  |
| C | -6.39883 | -0.05918 | -1.66656 | H | -3.73805  | 6.24472  | 1.14326  |
| C | -5.30289 | 0.78600  | -2.01283 | H | 0.35955   | 7.22583  | 0.29768  |
| C | -4.06317 | 0.61263  | -1.45602 | H | 6.72068   | 0.40091  | -3.64011 |
| C | -5.70318 | -3.35718 | 0.92563  | H | 4.45037   | -0.49112 | -3.33396 |
| C | -6.95734 | -3.11868 | 0.44899  | H | 5.48329   | -0.75935 | 3.38978  |
| C | -7.22587 | -2.01652 | -0.43792 | H | 7.75049   | 0.13735  | 3.06902  |
| C | -8.49393 | -1.77852 | -0.97119 | H | 9.52073   | 0.95646  | 1.57125  |
| C | -8.75976 | -0.70893 | -1.85565 | H | 8.87199   | 1.12475  | -2.67642 |
| C | -7.69884 | 0.12859  | -2.18993 | H | 11.09921  | 0.56606  | -2.69805 |
| C | -1.12285 | 4.15576  | 0.46927  | H | 11.67780  | -0.28705 | -1.25876 |
| C | -0.10419 | 5.13878  | 0.31601  | H | 12.59308  | 1.08697  | -1.90756 |
| C | 1.23645  | 4.70419  | 0.06348  | H | 10.18150  | 2.99378  | -2.46935 |
| C | 1.54769  | 3.37314  | -0.00138 | H | 11.69502  | 3.46164  | -1.68348 |
| C | -3.14420 | 2.23976  | 0.83668  | H | 10.14505  | 3.76613  | -0.87642 |
| C | -3.42995 | 3.56874  | 0.99833  | H | 11.72334  | 0.89550  | 1.02273  |
| C | -2.44436 | 4.57871  | 0.77770  | H | 11.09512  | 2.55044  | 1.17980  |
| C | -2.72068 | 5.95211  | 0.89869  | H | 12.58113  | 2.24607  | 0.27482  |
| C | -1.73711 | 6.93587  | 0.72036  | H | -1.90425  | 8.45263  | 3.03983  |
| C | -0.43653 | 6.50185  | 0.43257  | H | -3.54943  | 8.09267  | 2.49211  |
| C | 6.75049  | 0.08177  | -0.21681 | H | -2.92846  | 9.74429  | 2.38615  |
| C | 7.22950  | 0.39098  | -1.52361 | H | -0.10312  | 9.17851  | 1.35448  |
| C | 6.35394  | 0.16681  | -2.64372 | H | -1.21604  | 10.39518 | 0.72448  |
| C | 5.09632  | -0.32692 | -2.47511 | H | -0.47941  | 9.23357  | -0.38243 |
| C | 5.84405  | -0.52308 | 2.39184  | H | -4.10503  | 8.18034  | -0.05105 |
| C | 7.10025  | -0.02586 | 2.21310  | H | -2.83346  | 8.60318  | -1.20923 |
| C | 7.60118  | 0.29408  | 0.90428  | H | -3.47454  | 9.83112  | -0.10204 |
| C | 8.89427  | 0.80500  | 0.69889  | H | -10.89968 | 0.58824  | -0.65251 |
| C | 9.38020  | 1.11373  | -0.57678 | H | -11.17611 | -1.15765 | -0.54305 |
| C | 8.52669  | 0.89714  | -1.67151 | H | -12.18394 | -0.17292 | -1.60963 |
| C | 10.79607 | 1.67196  | -0.81402 | H | -10.03199 | 1.63361  | -2.83725 |
| C | 11.58364 | 0.70011  | -1.72519 | H | -11.31561 | 0.79273  | -3.71097 |
| C | 10.69352 | 3.05378  | -1.50322 | H | -9.63834  | 0.59446  | -4.22517 |
| C | 11.58557 | 1.84722  | 0.49704  | H | -10.58905 | -2.68062 | -2.57662 |
| C | -2.10825 | 8.42427  | 0.85466  | H | -9.92181  | -1.95359 | -4.04723 |
| C | -2.65573 | 8.68833  | 2.27795  | H | -11.61181 | -1.66132 | -3.59603 |



## References

- 1 T. D. Lash, J. A. El-Beck and G. M. Ferrence, Syntheses and reactivity of meso-unsubstituted azuliporphyrins derived from 6-tert-butyl- and 6-phenylazulene, *Journal of Organic Chemistry*, 2007, **72**, 8402–8415.
- 2 A. C. Bédard, A. Vlassova, A. C. Hernandez-Perez, A. Bessette, G. S. Hanan, M. A. Heuft and S. K. Collins, Synthesis, crystal structure and photophysical properties of pyrene-helicene hybrids, *Chemistry - A European Journal*, 2013, **19**, 16295–16302.
- 3 L. J. Bourhis, O. V. Dolomanov, R. J. Gildea, J. A. K. Howard and H. Puschmann, The anatomy of a comprehensive constrained, restrained refinement program for the modern computing environment - Olex2 dissected, *Acta Crystallogr A*, 2015, **71**, 59–75.
- 4 G. M. Sheldrick, A short history of SHELX, *Acta Crystallographica Section A*, 2008, **64**, 112–122.
- 5 G. M. Sheldrick, Crystal structure refinement with SHELXL, *Acta Crystallographica Section C*, 2015, **71**, 3–8.
- 6 M. J. Frisch, G. W. Trucks, H. B. Schlegel, G. E. Scuseria, M. A. Robb, J. R. Cheeseman, G. Scalmani, V. Barone, G. A. Petersson, H. Nakatsuji, X. Li, M. Caricato, A. V. Marenich, J. Bloino, B. G. Janesko, R. Gomperts, B. Mennucci, H. P. Hratchian, J. V. Ortiz, A. F. Izmaylov, J. L. Sonnenberg, D. Williams-Young, F. Ding, F. Lipparini, F. Egidi, J. Goings, B. Peng, A. Petrone, T. Henderson, D. Ranasinghe, V. G. Zakrzewski, J. Gao, N. Rega, G. Zheng, W. Liang, M. Hada, M. Ehara, K. Toyota, R. Fukuda, J. Hasegawa, M. Ishida, T. Nakajima, Y. Honda, O. Kitao, H. Nakai, T. Vreven, K. Throssell, J. A. Montgomery Jr., J. E. Peralta, F. Ogliaro, M. J. Bearpark, J. J. Heyd, E. N. Brothers, K. N. Kudin, V. N. Staroverov, T. A. Keith, R. Kobayashi, J. Normand, K. Raghavachari, A. P. Rendell, J. C. Burant, S. S. Iyengar, J. Tomasi, M. Cossi, J. M. Millam, M. Klene, C. Adamo, R. Cammi, J. W. Ochterski, R. L. Martin, K. Morokuma, O. Farkas, J. B. Foresman and D. J. Fox, 2016.
- 7 A. D. Becke, Density-functional thermochemistry. III. The role of exact exchange, *J Chem Phys*, 1993, **98**, 5648–5652.
- 8 P. J. Stephens, F. J. Devlin, C. F. Chabalowski and M. J. Frisch, Ab Initio Calculation of Vibrational Absorption and Circular Dichroism Spectra Using Density Functional Force Fields, *J Phys Chem*, 1994, **98**, 11623–11627.
- 9 T. Lu and F. Chen, Multiwfn: A multifunctional wavefunction analyzer, *J Comput Chem*, 2012, **33**, 580–592.
- 10 I. Seguy, P. Jolinat, P. Destruel, R. Mamy, H. Allouchi, C. Courseille, M. Cotrait and H. Bock, Crystal and Electronic Structure of a Fluorescent Columnar Liquid Crystalline Electron Transport Material, *ChemPhysChem*, 2001, **2**, 448–452.
